# Supplementary material for: Quantum chemical modification of indaceno dithiophene-based small acceptor molecules with enhanced photovoltaic aspects for highly efficient organic solar cells
Source: Royal Society of Chemistry journal article supplement (doi:10.1039/d2ra05239c), 2022-01-01
Supplement: d2ra05239c1.pdf [file d2ra05239c1.pdf]

## Quantum Chemical modification of indaceno dithiophene-based small acceptor molecules with enhanced Photovoltaic aspects for highly efficient organic solar cells

Supporting information, Cartesian coordinates of internally optimized geometries of all molecules (reference **IDSTR**, and investigated molecules **IDST1**, **IDST2**, **IDST3**, **IDST4**, **IDST5**, **IDST6** and **IDST7** along X, Y and Z axis at MPW1PW91/6-31G (d, p) level of density functional theory (DFT).

### Cartesian coordinates of Reference Molecule IDSTR

| -----  |        |        |                         |           |           |
|--------|--------|--------|-------------------------|-----------|-----------|
| Center | Atomic | Atomic | Coordinates (Angstroms) |           |           |
| Number | Number | Type   | X                       | Y         | Z         |
| -----  |        |        |                         |           |           |
| 1      | 6      | 0      | -1.064387               | -0.284287 | 0.165203  |
| 2      | 6      | 0      | -0.606803               | -1.585701 | -0.107777 |
| 3      | 6      | 0      | -1.447211               | -2.693408 | -0.209805 |
| 4      | 6      | 0      | -2.790185               | -2.454278 | 0.082721  |
| 5      | 6      | 0      | -3.285415               | -1.161676 | 0.340288  |
| 6      | 6      | 0      | -2.429285               | -0.034957 | 0.464318  |
| 7      | 1      | 0      | -1.083512               | -3.664365 | -0.470971 |
| 8      | 1      | 0      | -2.791413               | 0.934990  | 0.737189  |
| 9      | 6      | 0      | 0.156056                | 0.699301  | 0.063680  |
| 10     | 6      | 0      | 0.243696                | 1.704937  | 1.232732  |
| 11     | 6      | 0      | 0.089831                | 1.497267  | -1.245526 |
| 12     | 6      | 0      | -3.943831               | -3.483315 | 0.180472  |
| 13     | 6      | 0      | -3.940282               | -4.510661 | -0.963844 |
| 14     | 6      | 0      | -3.858784               | -4.243434 | 1.516072  |
| 15     | 6      | 0      | 0.904753                | -1.517025 | -0.228205 |
| 16     | 6      | 0      | 1.340440                | -0.291165 | -0.003803 |
| 17     | 6      | 0      | 2.880389                | -0.211099 | 0.134057  |

|    |    |   |           |           |           |
|----|----|---|-----------|-----------|-----------|
| 18 | 6  | 0 | 3.424216  | -1.464634 | -0.053376 |
| 19 | 16 | 0 | 2.189881  | -2.672283 | -0.531389 |
| 20 | 1  | 0 | 3.441296  | 0.676996  | 0.346701  |
| 21 | 6  | 0 | -4.826836 | -1.312246 | 0.400509  |
| 22 | 6  | 0 | -5.172880 | -2.571527 | 0.183265  |
| 23 | 6  | 0 | -6.685685 | -2.793030 | -0.022013 |
| 24 | 6  | 0 | -7.356737 | -1.601072 | 0.106497  |
| 25 | 16 | 0 | -6.238596 | -0.279270 | 0.627929  |
| 26 | 1  | 0 | -7.143800 | -3.734408 | -0.244035 |
| 27 | 6  | 0 | 4.907299  | -1.820681 | 0.111111  |
| 28 | 6  | 0 | 5.360158  | -3.094524 | 0.195333  |
| 29 | 16 | 0 | 6.217561  | -0.651035 | 0.206542  |
| 30 | 6  | 0 | 6.934774  | -3.144651 | -0.019107 |
| 31 | 6  | 0 | 7.487767  | -1.849274 | -0.038479 |
| 32 | 1  | 0 | 7.500070  | -4.048268 | -0.133541 |
| 33 | 6  | 0 | 8.985089  | -1.387051 | -0.211083 |
| 34 | 6  | 0 | 10.663985 | 0.681467  | -0.169693 |
| 35 | 6  | 0 | 9.278042  | -0.028684 | -0.152316 |
| 36 | 6  | 0 | 8.251585  | 1.116289  | -0.053089 |
| 37 | 6  | 0 | 11.883982 | 0.083884  | -0.231836 |
| 38 | 6  | 0 | 11.982161 | -1.448284 | -0.283719 |
| 39 | 6  | 0 | 13.178224 | 0.927195  | -0.253988 |
| 40 | 8  | 0 | 7.004447  | 0.991470  | 0.001293  |
| 41 | 7  | 0 | 12.055361 | -2.590054 | -0.322383 |
| 42 | 7  | 0 | 14.145089 | 1.545682  | -0.270883 |
| 43 | 6  | 0 | 10.818002 | 4.589647  | 0.018991  |
| 44 | 6  | 0 | 11.321666 | 3.268488  | -0.057815 |
| 45 | 6  | 0 | 10.400770 | 2.210976  | -0.080716 |

|    |   |   |            |           |           |
|----|---|---|------------|-----------|-----------|
| 46 | 6 | 0 | 9.034223   | 2.449253  | -0.020856 |
| 47 | 6 | 0 | 8.516723   | 3.742906  | 0.050146  |
| 48 | 6 | 0 | 9.419969   | 4.823951  | 0.069968  |
| 49 | 1 | 0 | 12.374882  | 3.086789  | -0.096718 |
| 50 | 1 | 0 | 7.460059   | 3.910764  | 0.091525  |
| 51 | 9 | 0 | 8.951926   | 6.089440  | 0.137623  |
| 52 | 9 | 0 | 11.671580  | 5.637060  | 0.045149  |
| 53 | 6 | 0 | -8.871231  | -1.409114 | -0.146747 |
| 54 | 6 | 0 | -10.805258 | 0.360720  | -0.215242 |
| 55 | 6 | 0 | -9.351848  | -0.150916 | -0.104593 |
| 56 | 6 | 0 | -8.474459  | 1.081368  | 0.077250  |
| 57 | 6 | 0 | -11.941176 | -0.376988 | -0.359875 |
| 58 | 6 | 0 | -11.879296 | -1.914042 | -0.438831 |
| 59 | 6 | 0 | -13.311871 | 0.323673  | -0.441729 |
| 60 | 8 | 0 | -7.225437  | 1.089651  | 0.223691  |
| 61 | 7 | 0 | -11.842126 | -3.058435 | -0.498380 |
| 62 | 7 | 0 | -14.334870 | 0.840359  | -0.503261 |
| 63 | 6 | 0 | -11.400475 | 4.212182  | -0.091774 |
| 64 | 6 | 0 | -11.747244 | 2.845181  | -0.194091 |
| 65 | 6 | 0 | -10.719174 | 1.905686  | -0.127969 |
| 66 | 6 | 0 | -9.396674  | 2.301519  | 0.037100  |
| 67 | 6 | 0 | -9.031039  | 3.633847  | 0.143092  |
| 68 | 6 | 0 | -10.045861 | 4.602789  | 0.075791  |
| 69 | 1 | 0 | -12.766230 | 2.542830  | -0.318476 |
| 70 | 1 | 0 | -8.005891  | 3.912823  | 0.270757  |
| 71 | 9 | 0 | -9.726687  | 5.910483  | 0.171817  |
| 72 | 9 | 0 | -12.362612 | 5.156350  | -0.154253 |
| 73 | 1 | 0 | -9.510719  | -2.242627 | -0.358682 |

|    |    |   |           |           |           |
|----|----|---|-----------|-----------|-----------|
| 74 | 1  | 0 | 9.771320  | -2.095203 | -0.360941 |
| 75 | 1  | 0 | -3.037270 | -5.082184 | -0.928948 |
| 76 | 1  | 0 | -4.780918 | -5.163218 | -0.861413 |
| 77 | 1  | 0 | -4.000585 | -3.996460 | -1.902020 |
| 78 | 1  | 0 | -3.859939 | -3.543787 | 2.325206  |
| 79 | 1  | 0 | -4.701748 | -4.896057 | 1.606923  |
| 80 | 1  | 0 | -2.957394 | -4.818381 | 1.541970  |
| 81 | 1  | 0 | 1.121085  | 2.308028  | 1.121031  |
| 82 | 1  | 0 | -0.622870 | 2.331164  | 1.228984  |
| 83 | 1  | 0 | 0.295026  | 1.171642  | 2.160074  |
| 84 | 1  | 0 | 0.971132  | 2.098498  | -1.340348 |
| 85 | 1  | 0 | 0.030942  | 0.820259  | -2.071847 |
| 86 | 1  | 0 | -0.772845 | 2.126624  | -1.235863 |
| 87 | 16 | 0 | 4.125597  | -4.383203 | 0.538764  |
| 88 | 6  | 0 | 4.288884  | -6.019043 | -0.148076 |
| 89 | 1  | 0 | 5.167121  | -6.487494 | 0.236631  |
| 90 | 1  | 0 | 3.424915  | -6.607973 | 0.123119  |
| 91 | 1  | 0 | 4.349504  | -5.954701 | -1.210109 |

**Cartesian coordinates of Designed Molecule IDST1**

| -----  |        |        |                         |           |           |
|--------|--------|--------|-------------------------|-----------|-----------|
| Center | Atomic | Atomic | Coordinates (Angstroms) |           |           |
| Number | Number | Type   | X                       | Y         | Z         |
| -----  |        |        |                         |           |           |
| 1      | 6      | 0      | -1.033345               | -1.286346 | 0.214335  |
| 2      | 6      | 0      | -0.569640               | -2.623920 | 0.180051  |
| 3      | 6      | 0      | -1.466177               | -3.696157 | -0.009614 |
| 4      | 6      | 0      | -2.784451               | -3.356668 | -0.194264 |
| 5      | 6      | 0      | -3.249044               | -2.016472 | -0.116682 |

|    |    |   |           |           |           |
|----|----|---|-----------|-----------|-----------|
| 6  | 6  | 0 | -2.346276 | -0.941708 | 0.015762  |
| 7  | 1  | 0 | -1.138487 | -4.715509 | -0.025184 |
| 8  | 1  | 0 | -2.668205 | 0.079205  | -0.017253 |
| 9  | 6  | 0 | 0.174832  | -0.372152 | 0.515802  |
| 10 | 6  | 0 | 0.106396  | 0.123451  | 1.971912  |
| 11 | 6  | 0 | 0.281449  | 0.852105  | -0.406873 |
| 12 | 6  | 0 | -3.987833 | -4.286026 | -0.500572 |
| 13 | 6  | 0 | -3.964671 | -4.786555 | -1.957411 |
| 14 | 6  | 0 | -4.028714 | -5.517474 | 0.422502  |
| 15 | 6  | 0 | 0.859060  | -2.609040 | 0.333157  |
| 16 | 6  | 0 | 1.329493  | -1.360896 | 0.370367  |
| 17 | 6  | 0 | 2.736532  | -1.214959 | 0.267436  |
| 18 | 6  | 0 | 3.397284  | -2.476147 | 0.266285  |
| 19 | 16 | 0 | 2.177347  | -3.791061 | 0.455389  |
| 20 | 1  | 0 | 3.240277  | -0.274531 | 0.205273  |
| 21 | 6  | 0 | -4.681437 | -2.034369 | -0.149212 |
| 22 | 6  | 0 | -5.158269 | -3.308896 | -0.325845 |
| 23 | 6  | 0 | -6.565073 | -3.446620 | -0.314852 |
| 24 | 6  | 0 | -7.230069 | -2.186721 | -0.181516 |
| 25 | 16 | 0 | -6.016305 | -0.874654 | 0.069301  |
| 26 | 1  | 0 | -7.075860 | -4.382646 | -0.420153 |
| 27 | 6  | 0 | 4.812675  | -2.634911 | 0.144978  |
| 28 | 6  | 0 | 5.520526  | -3.853259 | 0.301255  |
| 29 | 16 | 0 | 5.972381  | -1.317559 | -0.198061 |
| 30 | 6  | 0 | 6.932314  | -3.697955 | 0.262502  |
| 31 | 6  | 0 | 7.373673  | -2.371278 | 0.086888  |
| 32 | 1  | 0 | 7.608663  | -4.520930 | 0.366669  |
| 33 | 6  | 0 | 8.757873  | -2.046687 | 0.144896  |

|    |   |   |            |           |           |
|----|---|---|------------|-----------|-----------|
| 34 | 6 | 0 | 10.837825  | -0.552531 | -0.030935 |
| 35 | 6 | 0 | 9.318995   | -0.798662 | 0.050069  |
| 36 | 6 | 0 | 8.675374   | 0.597041  | 0.006072  |
| 37 | 6 | 0 | 11.788157  | -1.512461 | 0.019551  |
| 38 | 6 | 0 | 11.403318  | -2.854563 | 0.141595  |
| 39 | 6 | 0 | 13.144491  | -1.169586 | -0.039185 |
| 40 | 8 | 0 | 7.447711   | 0.865028  | 0.052105  |
| 41 | 7 | 0 | 11.078903  | -3.948916 | 0.241289  |
| 42 | 7 | 0 | 14.255626  | -0.891507 | -0.087078 |
| 43 | 6 | 0 | 12.188838  | 3.045789  | -0.284438 |
| 44 | 6 | 0 | 12.263860  | 1.677205  | -0.322300 |
| 45 | 6 | 0 | 11.063850  | 0.967509  | -0.166713 |
| 46 | 6 | 0 | 9.840901   | 1.619909  | -0.099104 |
| 47 | 6 | 0 | 9.768486   | 2.960909  | -0.125740 |
| 48 | 6 | 0 | 10.918859  | 3.683241  | -0.236168 |
| 49 | 1 | 0 | 13.201480  | 1.169641  | -0.450466 |
| 50 | 1 | 0 | 8.825957   | 3.458125  | -0.062542 |
| 51 | 6 | 0 | -8.655028  | -2.083397 | -0.276556 |
| 52 | 6 | 0 | -10.940862 | -0.857926 | -0.209601 |
| 53 | 6 | 0 | -9.397746  | -0.937376 | -0.105716 |
| 54 | 6 | 0 | -8.933293  | 0.489370  | 0.208415  |
| 55 | 6 | 0 | -11.754984 | -1.921434 | -0.447562 |
| 56 | 6 | 0 | -11.174611 | -3.178650 | -0.656555 |
| 57 | 6 | 0 | -13.152138 | -1.786889 | -0.490528 |
| 58 | 8 | 0 | -7.752981  | 0.864652  | 0.418633  |
| 59 | 7 | 0 | -10.688132 | -4.202883 | -0.826228 |
| 60 | 7 | 0 | -14.295019 | -1.693420 | -0.528741 |
| 61 | 6 | 0 | -12.655118 | 2.605457  | 0.050033  |

|    |    |   |            |           |           |
|----|----|---|------------|-----------|-----------|
| 62 | 6  | 0 | -12.615265 | 1.232189  | -0.020287 |
| 63 | 6  | 0 | -11.344145 | 0.627525  | -0.003222 |
| 64 | 6  | 0 | -10.197147 | 1.385822  | 0.208516  |
| 65 | 6  | 0 | -10.254902 | 2.718238  | 0.366282  |
| 66 | 6  | 0 | -11.457251 | 3.342595  | 0.219729  |
| 67 | 1  | 0 | -13.512915 | 0.651342  | -0.097213 |
| 68 | 1  | 0 | -9.373608  | 3.280458  | 0.586759  |
| 69 | 1  | 0 | -9.194975  | -2.979260 | -0.503470 |
| 70 | 1  | 0 | 9.435085   | -2.864471 | 0.272301  |
| 71 | 1  | 0 | -3.098736  | -5.395270 | -2.112501 |
| 72 | 1  | 0 | -4.846838  | -5.364036 | -2.144390 |
| 73 | 1  | 0 | -3.936120  | -3.951203 | -2.624291 |
| 74 | 1  | 0 | -4.046005  | -5.191916 | 1.443819  |
| 75 | 1  | 0 | -4.902229  | -6.094492 | 0.217511  |
| 76 | 1  | 0 | -3.156596  | -6.115606 | 0.255391  |
| 77 | 1  | 0 | 0.991232   | 0.679615  | 2.200709  |
| 78 | 1  | 0 | -0.751529  | 0.749568  | 2.095944  |
| 79 | 1  | 0 | 0.032960   | -0.716317 | 2.632495  |
| 80 | 1  | 0 | 1.163908   | 1.405944  | -0.163338 |
| 81 | 1  | 0 | 0.334101   | 0.524953  | -1.424122 |
| 82 | 1  | 0 | -0.577864  | 1.474605  | -0.275413 |
| 83 | 16 | 0 | 4.761914   | -5.444273 | 0.556619  |
| 84 | 6  | 0 | 5.983867   | -6.722690 | 0.308968  |
| 85 | 1  | 0 | 6.769615   | -6.606771 | 1.029182  |
| 86 | 1  | 0 | 5.527676   | -7.682828 | 0.433253  |
| 87 | 1  | 0 | 6.391070   | -6.646007 | -0.676483 |
| 88 | 6  | 0 | -11.499491 | 4.880867  | 0.219242  |
| 89 | 6  | 0 | -13.978365 | 3.398078  | -0.069558 |

|     |   |   |            |          |           |
|-----|---|---|------------|----------|-----------|
| 90  | 6 | 0 | -12.592909 | 6.924942 | 0.430136  |
| 91  | 6 | 0 | -15.107611 | 5.459859 | 0.322461  |
| 92  | 8 | 0 | -10.443244 | 5.533032 | 0.417342  |
| 93  | 8 | 0 | -15.088560 | 2.805059 | -0.109100 |
| 94  | 8 | 0 | -13.910583 | 4.832866 | -0.148786 |
| 95  | 8 | 0 | -12.725845 | 5.575715 | -0.020460 |
| 96  | 1 | 0 | -11.787015 | 7.394343 | -0.096666 |
| 97  | 1 | 0 | -13.501031 | 7.457134 | 0.239026  |
| 98  | 1 | 0 | -12.387074 | 6.934848 | 1.478795  |
| 99  | 1 | 0 | -15.015558 | 6.522411 | 0.215635  |
| 100 | 1 | 0 | -15.941674 | 5.115865 | -0.252263 |
| 101 | 1 | 0 | -15.259031 | 5.217652 | 1.352295  |
| 102 | 6 | 0 | 10.792677  | 5.217565 | -0.323833 |
| 103 | 6 | 0 | 13.454601  | 3.932642 | -0.258961 |
| 104 | 6 | 0 | 11.672425  | 7.357339 | -0.100417 |
| 105 | 6 | 0 | 14.306541  | 6.185330 | -0.273383 |
| 106 | 8 | 0 | 9.671766   | 5.745196 | -0.112765 |
| 107 | 8 | 0 | 14.586138  | 3.477059 | -0.575530 |
| 108 | 8 | 0 | 11.901681  | 6.058041 | -0.654814 |
| 109 | 1 | 0 | 10.699979  | 7.700691 | -0.390517 |
| 110 | 1 | 0 | 11.728672  | 7.304355 | 0.965317  |
| 111 | 1 | 0 | 12.412754  | 8.039550 | -0.464099 |
| 112 | 1 | 0 | 14.122863  | 7.155592 | 0.140047  |
| 113 | 1 | 0 | 15.261711  | 5.833493 | 0.057546  |
| 114 | 1 | 0 | 14.296210  | 6.243230 | -1.338587 |
| 115 | 8 | 0 | 13.284698  | 5.294030 | 0.172719  |



## Cartesian coordinates of Designed Molecule IDST2

---

| Center<br>Number | Atomic<br>Number | Atomic<br>Type | Coordinates (Angstroms) |           |           |
|------------------|------------------|----------------|-------------------------|-----------|-----------|
|                  |                  |                | X                       | Y         | Z         |
| 1                | 6                | 0              | -1.055448               | -0.947397 | 0.207256  |
| 2                | 6                | 0              | -0.587483               | -2.283610 | 0.178168  |
| 3                | 6                | 0              | -1.480881               | -3.359574 | -0.005084 |
| 4                | 6                | 0              | -2.800568               | -3.025173 | -0.188925 |
| 5                | 6                | 0              | -3.269353               | -1.686146 | -0.116549 |
| 6                | 6                | 0              | -2.369833               | -0.607891 | 0.009461  |
| 7                | 1                | 0              | -1.149926               | -4.377925 | -0.016649 |
| 8                | 1                | 0              | -2.695117               | 0.411819  | -0.027576 |
| 9                | 6                | 0              | 0.150296                | -0.027963 | 0.502468  |
| 10               | 6                | 0              | 0.082816                | 0.473970  | 1.956452  |
| 11               | 6                | 0              | 0.251334                | 1.192463  | -0.425893 |
| 12               | 6                | 0              | -4.001476               | -3.959776 | -0.488918 |
| 13               | 6                | 0              | -3.979255               | -4.466785 | -1.943529 |
| 14               | 6                | 0              | -4.036755               | -5.187180 | 0.439758  |
| 15               | 6                | 0              | 0.841428                | -2.263433 | 0.328675  |
| 16               | 6                | 0              | 1.307889                | -1.013624 | 0.359437  |
| 17               | 6                | 0              | 2.714266                | -0.863616 | 0.253358  |
| 18               | 6                | 0              | 3.379088                | -2.122659 | 0.256711  |
| 19               | 16               | 0              | 2.163741                | -3.440635 | 0.453888  |
| 20               | 1                | 0              | 3.214859                | 0.078141  | 0.186074  |
| 21               | 6                | 0              | -4.701736               | -1.708808 | -0.146462 |
| 22               | 6                | 0              | -5.174755               | -2.985648 | -0.316515 |
| 23               | 6                | 0              | -6.581086               | -3.127856 | -0.302411 |

|    |    |   |           |           |           |
|----|----|---|-----------|-----------|-----------|
| 24 | 6  | 0 | -7.249915 | -1.869520 | -0.173566 |
| 25 | 16 | 0 | -6.039959 | -0.552431 | 0.069197  |
| 26 | 1  | 0 | -7.089028 | -4.065990 | -0.402596 |
| 27 | 6  | 0 | 4.794769  | -2.277404 | 0.133612  |
| 28 | 6  | 0 | 5.506828  | -3.492747 | 0.294114  |
| 29 | 16 | 0 | 5.949608  | -0.957878 | -0.217402 |
| 30 | 6  | 0 | 6.918037  | -3.333068 | 0.252163  |
| 31 | 6  | 0 | 7.354796  | -2.005779 | 0.069802  |
| 32 | 1  | 0 | 7.597224  | -4.153380 | 0.358833  |
| 33 | 6  | 0 | 8.738039  | -1.676469 | 0.123898  |
| 34 | 6  | 0 | 10.812839 | -0.176421 | -0.062336 |
| 35 | 6  | 0 | 9.294957  | -0.427081 | 0.022464  |
| 36 | 6  | 0 | 8.646752  | 0.966328  | -0.026671 |
| 37 | 6  | 0 | 11.766356 | -1.133045 | -0.009216 |
| 38 | 6  | 0 | 11.386072 | -2.475817 | 0.119545  |
| 39 | 6  | 0 | 13.121469 | -0.786067 | -0.071896 |
| 40 | 8  | 0 | 7.418312  | 1.230560  | 0.020330  |
| 41 | 7  | 0 | 11.065372 | -3.570751 | 0.224735  |
| 42 | 7  | 0 | 14.231614 | -0.504625 | -0.123006 |
| 43 | 6  | 0 | 12.151767 | 3.425058  | -0.334415 |
| 44 | 6  | 0 | 12.231145 | 2.056566  | -0.366253 |
| 45 | 6  | 0 | 11.033710 | 1.343713  | -0.205350 |
| 46 | 6  | 0 | 9.808780  | 1.992464  | -0.138511 |
| 47 | 6  | 0 | 9.731985  | 3.333090  | -0.171051 |
| 48 | 6  | 0 | 10.879820 | 4.058623  | -0.286764 |
| 49 | 1  | 0 | 13.170175 | 1.551456  | -0.493795 |
| 50 | 1  | 0 | 8.787966  | 3.827544  | -0.108420 |
| 51 | 6  | 0 | -8.675366 | -1.771221 | -0.266546 |

|    |   |   |            |           |           |
|----|---|---|------------|-----------|-----------|
| 52 | 6 | 0 | -10.965027 | -0.552837 | -0.201056 |
| 53 | 6 | 0 | -9.421482  | -0.626842 | -0.099548 |
| 54 | 6 | 0 | -8.961093  | 0.802794  | 0.207339  |
| 55 | 6 | 0 | -11.776124 | -1.620026 | -0.432789 |
| 56 | 6 | 0 | -11.192058 | -2.876292 | -0.637152 |
| 57 | 6 | 0 | -13.173780 | -1.490181 | -0.473885 |
| 58 | 8 | 0 | -7.781633  | 1.182823  | 0.413776  |
| 59 | 7 | 0 | -10.702571 | -3.899705 | -0.803077 |
| 60 | 7 | 0 | -14.317022 | -1.400571 | -0.510493 |
| 61 | 6 | 0 | -12.690010 | 2.906135  | 0.046032  |
| 62 | 6 | 0 | -12.645843 | 1.532700  | -0.018181 |
| 63 | 6 | 0 | -11.372746 | 0.932221  | -0.000647 |
| 64 | 6 | 0 | -10.227835 | 1.695157  | 0.205646  |
| 65 | 6 | 0 | -10.289620 | 3.028077  | 0.357519  |
| 66 | 6 | 0 | -11.494236 | 3.647888  | 0.210288  |
| 67 | 1 | 0 | -13.541744 | 0.948621  | -0.090903 |
| 68 | 1 | 0 | -9.409761  | 3.594124  | 0.573904  |
| 69 | 1 | 0 | -9.212812  | -2.669832 | -0.488471 |
| 70 | 1 | 0 | 9.418114   | -2.491482 | 0.253781  |
| 71 | 1 | 0 | -3.111631  | -5.073397 | -2.097412 |
| 72 | 1 | 0 | -4.859879  | -5.047943 | -2.126346 |
| 73 | 1 | 0 | -3.954576  | -3.634357 | -2.614209 |
| 74 | 1 | 0 | -4.053304  | -4.857083 | 1.459629  |
| 75 | 1 | 0 | -4.908760  | -5.767929 | 0.238912  |
| 76 | 1 | 0 | -3.163003  | -5.783243 | 0.273795  |
| 77 | 1 | 0 | 0.966250   | 1.034009  | 2.181178  |
| 78 | 1 | 0 | -0.776910  | 1.097869  | 2.079185  |
| 79 | 1 | 0 | 0.013255   | -0.363047 | 2.620935  |

|     |    |   |            |           |           |
|-----|----|---|------------|-----------|-----------|
| 80  | 1  | 0 | 1.132424   | 1.750236  | -0.186414 |
| 81  | 1  | 0 | 0.303257   | 0.860904  | -1.441751 |
| 82  | 1  | 0 | -0.609754  | 1.812775  | -0.295713 |
| 83  | 16 | 0 | 4.753813   | -5.085032 | 0.557976  |
| 84  | 6  | 0 | 5.979454   | -6.360606 | 0.313914  |
| 85  | 1  | 0 | 6.766087   | -6.238911 | 1.032207  |
| 86  | 1  | 0 | 5.526588   | -7.321639 | 0.443325  |
| 87  | 1  | 0 | 6.384676   | -6.287049 | -0.672592 |
| 88  | 6  | 0 | -11.541448 | 5.185998  | 0.202957  |
| 89  | 6  | 0 | -14.016020 | 3.693938  | -0.074780 |
| 90  | 6  | 0 | -12.641096 | 7.227466  | 0.406590  |
| 91  | 8  | 0 | -10.486968 | 5.842451  | 0.396250  |
| 92  | 8  | 0 | -12.770461 | 5.875802  | -0.037696 |
| 93  | 1  | 0 | -11.837650 | 7.697085  | -0.123745 |
| 94  | 1  | 0 | -13.551268 | 7.755861  | 0.214697  |
| 95  | 1  | 0 | -12.433452 | 7.242759  | 1.454827  |
| 96  | 6  | 0 | 10.748526  | 5.592121  | -0.381106 |
| 97  | 6  | 0 | 13.414700  | 4.316094  | -0.315169 |
| 98  | 6  | 0 | 11.621745  | 7.735705  | -0.168876 |
| 99  | 8  | 0 | 9.626288   | 6.117081  | -0.170429 |
| 100 | 8  | 0 | 11.854225  | 6.434670  | -0.717828 |
| 101 | 1  | 0 | 10.647686  | 8.074610  | -0.458795 |
| 102 | 1  | 0 | 11.680035  | 7.687704  | 0.896984  |
| 103 | 1  | 0 | 12.359225  | 8.418655  | -0.536934 |
| 104 | 7  | 0 | -14.961397 | 4.183352  | 0.304216  |
| 105 | 7  | 0 | 14.468774  | 4.634801  | -0.061689 |

### Cartesian coordinates of Designed Molecule IDST3

---

| Center<br>Number | Atomic<br>Number | Atomic<br>Type | Coordinates (Angstroms) |           |           |
|------------------|------------------|----------------|-------------------------|-----------|-----------|
|                  |                  |                | X                       | Y         | Z         |
| 1                | 6                | 0              | 0.990871                | -0.346246 | -0.099808 |
| 2                | 6                | 0              | 0.561688                | -1.695032 | 0.009102  |
| 3                | 6                | 0              | 1.471429                | -2.750087 | 0.136239  |
| 4                | 6                | 0              | 2.819072                | -2.439769 | 0.151896  |
| 5                | 6                | 0              | 3.247369                | -1.093556 | 0.040223  |
| 6                | 6                | 0              | 2.335755                | -0.037038 | -0.086031 |
| 7                | 1                | 0              | 1.125671                | -3.775110 | 0.220371  |
| 8                | 1                | 0              | 2.682639                | 0.987699  | -0.170329 |
| 9                | 6                | 0              | -0.195318               | 0.607667  | -0.227152 |
| 10               | 6                | 0              | -0.162130               | 1.364272  | -1.564389 |
| 11               | 6                | 0              | -0.245977               | 1.596756  | 0.948393  |
| 12               | 6                | 0              | 4.003366                | -3.395815 | 0.281669  |
| 13               | 6                | 0              | 3.968697                | -4.149266 | 1.620469  |
| 14               | 6                | 0              | 4.051303                | -4.388022 | -0.891411 |
| 15               | 6                | 0              | -0.876915               | -1.668249 | -0.040877 |
| 16               | 6                | 0              | -1.345252               | -0.374547 | -0.173516 |
| 17               | 6                | 0              | -2.739401               | -0.303425 | -0.235180 |
| 18               | 6                | 0              | -3.347314               | -1.555322 | -0.145241 |
| 19               | 16               | 0              | -2.140144               | -2.824705 | 0.014358  |
| 20               | 1                | 0              | -3.308022               | 0.610564  | -0.352708 |
| 21               | 6                | 0              | 4.684445                | -1.110138 | 0.086819  |
| 22               | 6                | 0              | 5.153790                | -2.413798 | 0.224739  |
| 23               | 6                | 0              | 6.537130                | -2.466240 | 0.273226  |

|    |    |   |            |           |           |
|----|----|---|------------|-----------|-----------|
| 24 | 6  | 0 | 7.144794   | -1.198507 | 0.169339  |
| 25 | 16 | 0 | 5.922420   | 0.066625  | 0.011638  |
| 26 | 1  | 0 | 7.134005   | -3.364789 | 0.378005  |
| 27 | 6  | 0 | -4.757727  | -1.805288 | -0.152251 |
| 28 | 6  | 0 | -5.474899  | -3.014771 | -0.242110 |
| 29 | 16 | 0 | -5.825176  | -0.437396 | -0.038921 |
| 30 | 6  | 0 | -6.853858  | -2.794643 | -0.230965 |
| 31 | 6  | 0 | -7.237487  | -1.454010 | -0.130640 |
| 32 | 1  | 0 | -7.596382  | -3.578554 | -0.299812 |
| 33 | 6  | 0 | -8.606609  | -1.112742 | -0.111431 |
| 34 | 6  | 0 | -10.732832 | 0.265121  | -0.022596 |
| 35 | 6  | 0 | -9.285389  | 0.084244  | -0.026384 |
| 36 | 6  | 0 | -8.659739  | 1.409979  | 0.077654  |
| 37 | 6  | 0 | -11.719218 | -0.694062 | -0.101334 |
| 38 | 6  | 0 | -11.457831 | -2.091038 | -0.202335 |
| 39 | 6  | 0 | -13.110571 | -0.388967 | -0.088814 |
| 40 | 8  | 0 | -7.470874  | 1.681809  | 0.105278  |
| 41 | 7  | 0 | -11.271521 | -3.235689 | -0.285542 |
| 42 | 7  | 0 | -14.253294 | -0.176729 | -0.081433 |
| 43 | 6  | 0 | -12.088991 | 3.855744  | 0.237523  |
| 44 | 6  | 0 | -12.171330 | 2.461461  | 0.131747  |
| 45 | 6  | 0 | -10.991284 | 1.723607  | 0.084747  |
| 46 | 6  | 0 | -9.763842  | 2.394545  | 0.143658  |
| 47 | 6  | 0 | -9.660072  | 3.766272  | 0.248354  |
| 48 | 6  | 0 | -10.838950 | 4.515097  | 0.296333  |
| 49 | 1  | 0 | -13.149712 | 2.004473  | 0.089453  |
| 50 | 1  | 0 | -8.689105  | 4.244644  | 0.291860  |
| 51 | 6  | 0 | 8.549184   | -1.087025 | 0.195738  |

|    |   |   |           |           |           |
|----|---|---|-----------|-----------|-----------|
| 52 | 6 | 0 | 10.884231 | -0.101689 | 0.149397  |
| 53 | 6 | 0 | 9.428489  | -0.026258 | 0.110139  |
| 54 | 6 | 0 | 9.048933  | 1.384018  | -0.046869 |
| 55 | 6 | 0 | 11.685836 | -1.213852 | 0.290960  |
| 56 | 6 | 0 | 11.183471 | -2.539802 | 0.429654  |
| 57 | 6 | 0 | 13.108880 | -1.155450 | 0.313794  |
| 58 | 8 | 0 | 7.928699  | 1.861821  | -0.115581 |
| 59 | 7 | 0 | 10.800820 | -3.631783 | 0.544736  |
| 60 | 7 | 0 | 14.270871 | -1.146345 | 0.336785  |
| 61 | 6 | 0 | 12.915753 | 3.258344  | -0.189848 |
| 62 | 6 | 0 | 12.691331 | 1.802115  | -0.030572 |
| 63 | 6 | 0 | 11.398966 | 1.284496  | 0.006207  |
| 64 | 6 | 0 | 10.310869 | 2.157463  | -0.107668 |
| 65 | 6 | 0 | 10.452576 | 3.521395  | -0.257389 |
| 66 | 6 | 0 | 11.689203 | 4.027347  | -0.294159 |
| 67 | 1 | 0 | 13.572599 | 1.182639  | 0.053499  |
| 68 | 1 | 0 | 9.581777  | 4.160444  | -0.341693 |
| 69 | 1 | 0 | 9.002825  | -2.064941 | 0.305974  |
| 70 | 1 | 0 | -9.222139 | -2.001809 | -0.178715 |
| 71 | 1 | 0 | 3.091096  | -4.798462 | 1.671439  |
| 72 | 1 | 0 | 4.857117  | -4.776375 | 1.727505  |
| 73 | 1 | 0 | 3.932972  | -3.455301 | 2.462246  |
| 74 | 1 | 0 | 4.072835  | -3.865308 | -1.849599 |
| 75 | 1 | 0 | 4.942016  | -5.017340 | -0.822120 |
| 76 | 1 | 0 | 3.176170  | -5.042461 | -0.876072 |
| 77 | 1 | 0 | -1.053197 | 1.987712  | -1.671415 |
| 78 | 1 | 0 | 0.712326  | 2.017775  | -1.612733 |
| 79 | 1 | 0 | -0.122377 | 0.672027  | -2.407385 |

|    |    |   |            |           |           |
|----|----|---|------------|-----------|-----------|
| 80 | 1  | 0 | -1.140015  | 2.221840  | 0.882029  |
| 81 | 1  | 0 | -0.263885  | 1.071362  | 1.905105  |
| 82 | 1  | 0 | 0.625691   | 2.255785  | 0.933438  |
| 83 | 16 | 0 | -4.705530  | -4.590927 | -0.382413 |
| 84 | 6  | 0 | -6.124133  | -5.711762 | -0.368743 |
| 85 | 1  | 0 | -6.767057  | -5.557933 | -1.237180 |
| 86 | 1  | 0 | -5.700004  | -6.714228 | -0.421169 |
| 87 | 1  | 0 | -6.696123  | -5.620039 | 0.556233  |
| 88 | 6  | 0 | 12.024881  | 5.445430  | -0.445498 |
| 89 | 6  | 0 | 14.242175  | 3.790418  | -0.228444 |
| 90 | 6  | 0 | -10.768030 | 5.937817  | 0.405084  |
| 91 | 6  | 0 | -13.299696 | 4.614750  | 0.285045  |
| 92 | 7  | 0 | 15.324729  | 4.206355  | -0.259551 |
| 93 | 7  | 0 | -14.290547 | 5.216482  | 0.323052  |
| 94 | 7  | 0 | 12.252730  | 6.576326  | -0.566811 |
| 95 | 7  | 0 | -10.677729 | 7.091018  | 0.493428  |

**Cartesian coordinates of Designed Molecule IDST4**

| -----  |        |        |                         |           |           |
|--------|--------|--------|-------------------------|-----------|-----------|
| Center | Atomic | Atomic | Coordinates (Angstroms) |           |           |
| Number | Number | Type   | X                       | Y         | Z         |
| -----  |        |        |                         |           |           |
| 1      | 6      | 0      | -1.079015               | -0.500271 | 0.248328  |
| 2      | 6      | 0      | -0.616956               | -1.837973 | 0.200582  |
| 3      | 6      | 0      | -1.516461               | -2.910927 | 0.017701  |
| 4      | 6      | 0      | -2.833826               | -2.567367 | -0.166155 |
| 5      | 6      | 0      | -3.294927               | -1.226620 | -0.082195 |
| 6      | 6      | 0      | -2.392044               | -0.153502 | 0.057543  |
| 7      | 1      | 0      | -1.190518               | -3.930132 | 0.006990  |



|    |    |   |           |           |           |
|----|----|---|-----------|-----------|-----------|
| 8  | 1  | 0 | -2.713304 | 0.866769  | 0.038773  |
| 9  | 6  | 0 | 0.130897  | 0.409601  | 0.556151  |
| 10 | 6  | 0 | 0.080392  | 0.877261  | 2.020497  |
| 11 | 6  | 0 | 0.224376  | 1.653210  | -0.344722 |
| 12 | 6  | 0 | -4.041182 | -3.488542 | -0.480077 |
| 13 | 6  | 0 | -4.020697 | -3.946782 | -1.949962 |
| 14 | 6  | 0 | -4.089492 | -4.746221 | 0.407221  |
| 15 | 6  | 0 | 0.813344  | -1.823045 | 0.334159  |
| 16 | 6  | 0 | 1.283935  | -0.575759 | 0.379458  |
| 17 | 6  | 0 | 2.689003  | -0.427902 | 0.253898  |
| 18 | 6  | 0 | 3.349000  | -1.689899 | 0.227091  |
| 19 | 16 | 0 | 2.132387  | -3.006448 | 0.422644  |
| 20 | 1  | 0 | 3.192158  | 0.513644  | 0.192476  |
| 21 | 6  | 0 | -4.726524 | -1.239554 | -0.115425 |
| 22 | 6  | 0 | -5.204849 | -2.515701 | -0.265676 |
| 23 | 6  | 0 | -6.606522 | -2.659527 | -0.194669 |
| 24 | 6  | 0 | -7.266198 | -1.400678 | -0.072851 |
| 25 | 16 | 0 | -6.054394 | -0.072364 | 0.088361  |
| 26 | 1  | 0 | -7.118306 | -3.597709 | -0.249039 |
| 27 | 6  | 0 | 4.761558  | -1.851731 | 0.078479  |
| 28 | 6  | 0 | 5.464395  | -3.076313 | 0.202825  |
| 29 | 16 | 0 | 5.924204  | -0.536867 | -0.263380 |
| 30 | 6  | 0 | 6.876090  | -2.929518 | 0.145436  |
| 31 | 6  | 0 | 7.322774  | -1.603930 | -0.016362 |
| 32 | 1  | 0 | 7.547898  | -3.758431 | 0.228265  |
| 33 | 6  | 0 | 8.709475  | -1.286696 | 0.025678  |
| 34 | 6  | 0 | 10.785588 | 0.230936  | -0.139407 |
| 35 | 6  | 0 | 9.267356  | -0.035125 | -0.057845 |

|    |   |   |            |           |           |
|----|---|---|------------|-----------|-----------|
| 36 | 6 | 0 | 8.605569   | 1.352025  | -0.083610 |
| 37 | 6 | 0 | 11.744678  | -0.732500 | -0.130359 |
| 38 | 6 | 0 | 11.356797  | -2.077837 | -0.033697 |
| 39 | 6 | 0 | 13.102798  | -0.393871 | -0.208780 |
| 40 | 8 | 0 | 7.375143   | 1.600814  | -0.034317 |
| 41 | 7 | 0 | 11.039794  | -3.178049 | 0.045343  |
| 42 | 7 | 0 | 14.214414  | -0.124046 | -0.272605 |
| 43 | 6 | 0 | 12.067669  | 3.879331  | -0.245098 |
| 44 | 6 | 0 | 12.171142  | 2.509633  | -0.320206 |
| 45 | 6 | 0 | 10.985564  | 1.764685  | -0.222760 |
| 46 | 6 | 0 | 9.750052   | 2.397828  | -0.169179 |
| 47 | 6 | 0 | 9.645298   | 3.739937  | -0.189964 |
| 48 | 6 | 0 | 10.785529  | 4.492095  | -0.209943 |
| 49 | 1 | 0 | 13.120989  | 2.027714  | -0.445782 |
| 50 | 1 | 0 | 8.686779   | 4.210717  | -0.178048 |
| 51 | 6 | 0 | -8.686775  | -1.307448 | -0.106287 |
| 52 | 6 | 0 | -10.950544 | -0.084930 | -0.028193 |
| 53 | 6 | 0 | -9.411985  | -0.165251 | 0.071308  |
| 54 | 6 | 0 | -8.936112  | 1.260809  | 0.385099  |
| 55 | 6 | 0 | -11.789900 | -1.122478 | -0.265552 |
| 56 | 6 | 0 | -11.233744 | -2.380032 | -0.499269 |
| 57 | 6 | 0 | -13.188969 | -0.964242 | -0.288746 |
| 58 | 8 | 0 | -7.756601  | 1.633049  | 0.615882  |
| 59 | 7 | 0 | -10.768505 | -3.406937 | -0.690305 |
| 60 | 7 | 0 | -14.331979 | -0.848762 | -0.310463 |
| 61 | 6 | 0 | -12.659461 | 3.292569  | 0.060764  |
| 62 | 6 | 0 | -12.600340 | 1.948295  | 0.146382  |
| 63 | 6 | 0 | -11.335450 | 1.382625  | 0.160281  |

|    |    |   |            |           |           |
|----|----|---|------------|-----------|-----------|
| 64 | 6  | 0 | -10.198958 | 2.153537  | 0.337913  |
| 65 | 6  | 0 | -10.277067 | 3.488712  | 0.415911  |
| 66 | 6  | 0 | -11.478007 | 4.063207  | 0.110523  |
| 67 | 1  | 0 | -13.488513 | 1.354522  | 0.185499  |
| 68 | 1  | 0 | -9.430458  | 4.081322  | 0.690411  |
| 69 | 1  | 0 | -9.238014  | -2.204215 | -0.293355 |
| 70 | 1  | 0 | 9.386654   | -2.109454 | 0.129173  |
| 71 | 1  | 0 | -3.158566  | -4.555165 | -2.122775 |
| 72 | 1  | 0 | -4.905624  | -4.515628 | -2.154906 |
| 73 | 1  | 0 | -3.990147  | -3.092686 | -2.591987 |
| 74 | 1  | 0 | -4.105686  | -4.452428 | 1.437242  |
| 75 | 1  | 0 | -4.969116  | -5.310779 | 0.184014  |
| 76 | 1  | 0 | -3.223110  | -5.346148 | 0.221733  |
| 77 | 1  | 0 | 0.967913   | 1.430345  | 2.247965  |
| 78 | 1  | 0 | -0.775932  | 1.500297  | 2.166915  |
| 79 | 1  | 0 | 0.016602   | 0.025030  | 2.664700  |
| 80 | 1  | 0 | 1.109639   | 2.203036  | -0.102413 |
| 81 | 1  | 0 | 0.264226   | 1.347175  | -1.369973 |
| 82 | 1  | 0 | -0.633773  | 2.271728  | -0.190296 |
| 83 | 16 | 0 | 4.702257   | -4.667347 | 0.444199  |
| 84 | 6  | 0 | 5.913349   | -5.942538 | 0.136067  |
| 85 | 1  | 0 | 6.720498   | -5.841302 | 0.834296  |
| 86 | 1  | 0 | 5.459141   | -6.904011 | 0.255527  |
| 87 | 1  | 0 | 6.291169   | -5.847711 | -0.859747 |
| 88 | 6  | 0 | -11.544867 | 5.430954  | -0.170187 |
| 89 | 6  | 0 | -12.789785 | 6.066969  | -0.195431 |
| 90 | 6  | 0 | -13.966081 | 5.310267  | -0.118153 |
| 91 | 6  | 0 | -13.896540 | 3.917492  | -0.087048 |

|     |   |   |            |          |           |
|-----|---|---|------------|----------|-----------|
| 92  | 6 | 0 | 13.222256  | 4.691809 | -0.185249 |
| 93  | 6 | 0 | 13.094978  | 6.091118 | -0.111309 |
| 94  | 6 | 0 | 11.826673  | 6.687530 | -0.132305 |
| 95  | 6 | 0 | 10.679353  | 5.888586 | -0.192645 |
| 96  | 1 | 0 | 14.196906  | 4.247334 | -0.191494 |
| 97  | 1 | 0 | 13.967445  | 6.708073 | -0.037950 |
| 98  | 1 | 0 | 11.733993  | 7.753678 | -0.100837 |
| 99  | 1 | 0 | 9.714286   | 6.350307 | -0.220229 |
| 100 | 1 | 0 | -12.840378 | 7.129209 | -0.272944 |
| 101 | 1 | 0 | -10.647705 | 5.985574 | -0.366634 |
| 102 | 1 | 0 | -14.917566 | 5.794484 | -0.086612 |
| 103 | 1 | 0 | -14.784903 | 3.329046 | -0.174303 |

#### Cartesian coordinates of Designed Molecule IDST5

| Center<br>Number | Atomic<br>Number | Atomic<br>Type | Coordinates (Angstroms) |           |           |
|------------------|------------------|----------------|-------------------------|-----------|-----------|
|                  |                  |                | X                       | Y         | Z         |
| 1                | 6                | 0              | -1.103161               | -1.464092 | 0.206422  |
| 2                | 6                | 0              | -0.637743               | -2.801431 | 0.200475  |
| 3                | 6                | 0              | -1.534637               | -3.881104 | 0.048961  |
| 4                | 6                | 0              | -2.854097               | -3.546888 | -0.139108 |
| 5                | 6                | 0              | -3.319114               | -2.205916 | -0.094334 |
| 6                | 6                | 0              | -2.418091               | -1.126763 | 0.008749  |
| 7                | 1                | 0              | -1.205454               | -4.899149 | 0.063403  |
| 8                | 1                | 0              | -2.741968               | -0.108355 | -0.041223 |
| 9                | 6                | 0              | 0.105206                | -0.541586 | 0.480241  |
| 10               | 6                | 0              | 0.052626                | -0.020171 | 1.925988  |
| 11               | 6                | 0              | 0.197627                | 0.667489  | -0.466591 |

|    |    |   |           |           |           |
|----|----|---|-----------|-----------|-----------|
| 12 | 6  | 0 | -4.058895 | -4.482777 | -0.416925 |
| 13 | 6  | 0 | -4.042238 | -5.001383 | -1.866766 |
| 14 | 6  | 0 | -4.096636 | -5.702693 | 0.522042  |
| 15 | 6  | 0 | 0.792590  | -2.779346 | 0.335145  |
| 16 | 6  | 0 | 1.260459  | -1.530389 | 0.339420  |
| 17 | 6  | 0 | 2.665452  | -1.383631 | 0.213130  |
| 18 | 6  | 0 | 3.328699  | -2.643795 | 0.230784  |
| 19 | 16 | 0 | 2.114452  | -3.956368 | 0.464935  |
| 20 | 1  | 0 | 3.166714  | -0.443554 | 0.122132  |
| 21 | 6  | 0 | -4.751523 | -2.224460 | -0.122108 |
| 22 | 6  | 0 | -5.227186 | -3.504842 | -0.243311 |
| 23 | 6  | 0 | -6.631774 | -3.647364 | -0.189660 |
| 24 | 6  | 0 | -7.296844 | -2.383750 | -0.099687 |
| 25 | 16 | 0 | -6.083731 | -1.056538 | 0.057588  |
| 26 | 1  | 0 | -7.140742 | -4.587702 | -0.234723 |
| 27 | 6  | 0 | 4.742446  | -2.804682 | 0.092725  |
| 28 | 6  | 0 | 5.451209  | -4.020659 | 0.262601  |
| 29 | 16 | 0 | 5.899015  | -1.496126 | -0.291107 |
| 30 | 6  | 0 | 6.862012  | -3.868132 | 0.204320  |
| 31 | 6  | 0 | 7.301658  | -2.547257 | -0.002516 |
| 32 | 1  | 0 | 7.538886  | -4.689609 | 0.316582  |
| 33 | 6  | 0 | 8.685871  | -2.224112 | 0.025079  |
| 34 | 6  | 0 | 10.759075 | -0.724212 | -0.213309 |
| 35 | 6  | 0 | 9.242118  | -0.977814 | -0.116503 |
| 36 | 6  | 0 | 8.589000  | 0.419735  | -0.183328 |
| 37 | 6  | 0 | 11.719238 | -1.677450 | -0.154481 |
| 38 | 6  | 0 | 11.338384 | -3.017979 | 0.003510  |
| 39 | 6  | 0 | 13.078096 | -1.336539 | -0.230863 |

|    |   |   |            |           |           |
|----|---|---|------------|-----------|-----------|
| 40 | 8 | 0 | 7.359987   | 0.673973  | -0.125049 |
| 41 | 7 | 0 | 11.011493  | -4.111253 | 0.132261  |
| 42 | 7 | 0 | 14.188016  | -1.058053 | -0.293255 |
| 43 | 6 | 0 | 12.067344  | 2.854063  | -0.316616 |
| 44 | 6 | 0 | 12.162665  | 1.503628  | -0.481806 |
| 45 | 6 | 0 | 10.968307  | 0.799483  | -0.353119 |
| 46 | 6 | 0 | 9.742768   | 1.456214  | -0.302813 |
| 47 | 6 | 0 | 9.653946   | 2.810727  | -0.336836 |
| 48 | 6 | 0 | 10.826924  | 3.528937  | -0.280009 |
| 49 | 1 | 0 | 13.099644  | 1.014152  | -0.675965 |
| 50 | 1 | 0 | 8.709099   | 3.304935  | -0.386570 |
| 51 | 6 | 0 | -8.722786  | -2.289316 | -0.159001 |
| 52 | 6 | 0 | -11.012950 | -1.060676 | -0.102047 |
| 53 | 6 | 0 | -9.463856  | -1.141049 | -0.008479 |
| 54 | 6 | 0 | -8.993313  | 0.288739  | 0.266383  |
| 55 | 6 | 0 | -11.831051 | -2.122042 | -0.307005 |
| 56 | 6 | 0 | -11.253085 | -3.387667 | -0.501099 |
| 57 | 6 | 0 | -13.224348 | -1.986561 | -0.341132 |
| 58 | 8 | 0 | -7.808876  | 0.673423  | 0.447484  |
| 59 | 7 | 0 | -10.770784 | -4.416576 | -0.658245 |
| 60 | 7 | 0 | -14.366585 | -1.887543 | -0.370918 |
| 61 | 6 | 0 | -12.604610 | 2.490720  | 0.079332  |
| 62 | 6 | 0 | -12.667637 | 1.081078  | 0.061576  |
| 63 | 6 | 0 | -11.409321 | 0.438107  | 0.074388  |
| 64 | 6 | 0 | -10.244135 | 1.185115  | 0.254809  |
| 65 | 6 | 0 | -10.249430 | 2.521058  | 0.372941  |
| 66 | 6 | 0 | -11.374652 | 3.148811  | 0.182431  |
| 67 | 1 | 0 | -13.592676 | 0.498642  | 0.021414  |

|    |    |   |            |           |           |
|----|----|---|------------|-----------|-----------|
| 68 | 1  | 0 | -9.397340  | 3.079727  | 0.598523  |
| 69 | 1  | 0 | -9.264539  | -3.194008 | -0.341703 |
| 70 | 1  | 0 | 9.365858   | -3.037672 | 0.169344  |
| 71 | 1  | 0 | -3.178512  | -5.613118 | -2.018178 |
| 72 | 1  | 0 | -4.925964  | -5.582182 | -2.043318 |
| 73 | 1  | 0 | -4.018431  | -4.175132 | -2.544103 |
| 74 | 1  | 0 | -4.109413  | -5.365548 | 1.539011  |
| 75 | 1  | 0 | -4.973506  | -6.281075 | 0.327533  |
| 76 | 1  | 0 | -3.227281  | -6.304853 | 0.357695  |
| 77 | 1  | 0 | 0.938896   | 0.542522  | 2.133612  |
| 78 | 1  | 0 | -0.805005  | 0.606395  | 2.048269  |
| 79 | 1  | 0 | -0.010447  | -0.847984 | 2.601268  |
| 80 | 1  | 0 | 1.081788   | 1.227421  | -0.244243 |
| 81 | 1  | 0 | 0.239219   | 0.323051  | -1.479652 |
| 82 | 1  | 0 | -0.661573  | 1.289896  | -0.336577 |
| 83 | 16 | 0 | 4.695832   | -5.605833 | 0.559064  |
| 84 | 6  | 0 | 5.913899   | -6.887509 | 0.309947  |
| 85 | 1  | 0 | 6.713982   | -6.757689 | 1.011572  |
| 86 | 1  | 0 | 5.461471   | -7.845491 | 0.460815  |
| 87 | 1  | 0 | 6.300976   | -6.828571 | -0.685046 |
| 88 | 6  | 0 | 13.237080  | 3.829577  | -0.110844 |
| 89 | 6  | 0 | 12.857566  | 5.140994  | -0.036822 |
| 90 | 16 | 0 | 11.084995  | 5.273530  | -0.069273 |
| 91 | 1  | 0 | 14.241076  | 3.484781  | -0.042490 |
| 92 | 6  | 0 | -13.194661 | 4.888216  | 0.004141  |
| 93 | 6  | 0 | -13.693371 | 3.614357  | -0.009352 |
| 94 | 16 | 0 | -11.442712 | 4.894362  | 0.027425  |
| 95 | 1  | 0 | -14.731061 | 3.389270  | -0.066734 |

|    |    |   |            |          |          |
|----|----|---|------------|----------|----------|
| 96 | 35 | 0 | -14.201477 | 6.521884 | 0.004883 |
| 97 | 35 | 0 | 14.082909  | 6.625579 | 0.053073 |

### Cartesian coordinates of Designed Molecule IDST6

---

| Center<br>Number | Atomic<br>Number | Atomic<br>Type | Coordinates (Angstroms) |           |           |
|------------------|------------------|----------------|-------------------------|-----------|-----------|
|                  |                  |                | X                       | Y         | Z         |
| 1                | 6                | 0              | -1.048066               | -0.929193 | 0.252205  |
| 2                | 6                | 0              | -0.588097               | -2.267379 | 0.198226  |
| 3                | 6                | 0              | -1.489373               | -3.338130 | 0.011199  |
| 4                | 6                | 0              | -2.806330               | -2.991736 | -0.170251 |
| 5                | 6                | 0              | -3.265311               | -1.650668 | -0.080046 |
| 6                | 6                | 0              | -2.360686               | -0.579567 | 0.063837  |
| 7                | 1                | 0              | -1.165006               | -4.357777 | -0.004243 |
| 8                | 1                | 0              | -2.680388               | 0.441269  | 0.049801  |
| 9                | 6                | 0              | 0.163449                | -0.022553 | 0.563243  |
| 10               | 6                | 0              | 0.114635                | 0.438694  | 2.029679  |
| 11               | 6                | 0              | 0.258245                | 1.224889  | -0.332177 |
| 12               | 6                | 0              | -4.015309               | -3.909656 | -0.487440 |
| 13               | 6                | 0              | -3.996505               | -4.361413 | -1.959353 |
| 14               | 6                | 0              | -4.064966               | -5.171177 | 0.394312  |
| 15               | 6                | 0              | 0.842312                | -2.255239 | 0.330910  |
| 16               | 6                | 0              | 1.314852                | -1.008891 | 0.381416  |
| 17               | 6                | 0              | 2.720063                | -0.862637 | 0.255571  |
| 18               | 6                | 0              | 3.378099                | -2.125515 | 0.222734  |
| 19               | 16               | 0              | 2.159591                | -3.441047 | 0.413270  |
| 20               | 1                | 0              | 3.224625                | 0.078398  | 0.197982  |
| 21               | 6                | 0              | -4.696948               | -1.661255 | -0.112374 |



|    |    |   |           |           |           |
|----|----|---|-----------|-----------|-----------|
| 22 | 6  | 0 | -5.177336 | -2.935988 | -0.267954 |
| 23 | 6  | 0 | -6.579181 | -3.077975 | -0.196646 |
| 24 | 6  | 0 | -7.236838 | -1.818666 | -0.068813 |
| 25 | 16 | 0 | -6.022885 | -0.492941 | 0.097468  |
| 26 | 1  | 0 | -7.092444 | -4.015120 | -0.254827 |
| 27 | 6  | 0 | 4.790307  | -2.288857 | 0.072460  |
| 28 | 6  | 0 | 5.491341  | -3.515055 | 0.190911  |
| 29 | 16 | 0 | 5.954748  | -0.974278 | -0.264352 |
| 30 | 6  | 0 | 6.903222  | -3.370176 | 0.133227  |
| 31 | 6  | 0 | 7.351838  | -2.044572 | -0.022999 |
| 32 | 1  | 0 | 7.573809  | -4.200478 | 0.211935  |
| 33 | 6  | 0 | 8.739053  | -1.729657 | 0.019516  |
| 34 | 6  | 0 | 10.817389 | -0.214499 | -0.140238 |
| 35 | 6  | 0 | 9.298804  | -0.478587 | -0.058838 |
| 36 | 6  | 0 | 8.639136  | 0.909678  | -0.078017 |
| 37 | 6  | 0 | 11.775001 | -1.179438 | -0.136099 |
| 38 | 6  | 0 | 11.385115 | -2.524593 | -0.045136 |
| 39 | 6  | 0 | 13.133588 | -0.842551 | -0.213929 |
| 40 | 8  | 0 | 7.409126  | 1.160136  | -0.026798 |
| 41 | 7  | 0 | 11.066471 | -3.624655 | 0.029244  |
| 42 | 7  | 0 | 14.245575 | -0.574153 | -0.277304 |
| 43 | 6  | 0 | 12.105012 | 3.432354  | -0.230632 |
| 44 | 6  | 0 | 12.206327 | 2.062846  | -0.311874 |
| 45 | 6  | 0 | 11.019669 | 1.319295  | -0.216932 |
| 46 | 6  | 0 | 9.785169  | 1.954091  | -0.159721 |
| 47 | 6  | 0 | 9.682467  | 3.296438  | -0.174492 |
| 48 | 6  | 0 | 10.823840 | 4.046925  | -0.191905 |
| 49 | 1  | 0 | 13.155349 | 1.580029  | -0.440219 |

|    |   |   |            |           |           |
|----|---|---|------------|-----------|-----------|
| 50 | 1 | 0 | 8.724681   | 3.768633  | -0.159850 |
| 51 | 6 | 0 | -8.657292  | -1.723107 | -0.100883 |
| 52 | 6 | 0 | -10.919125 | -0.497472 | -0.015860 |
| 53 | 6 | 0 | -9.380626  | -0.580595 | 0.082254  |
| 54 | 6 | 0 | -8.902351  | 0.843329  | 0.402037  |
| 55 | 6 | 0 | -11.760233 | -1.532667 | -0.257249 |
| 56 | 6 | 0 | -11.206168 | -2.790027 | -0.496905 |
| 57 | 6 | 0 | -13.159072 | -1.372182 | -0.278804 |
| 58 | 8 | 0 | -7.722115  | 1.212731  | 0.633676  |
| 59 | 7 | 0 | -10.742637 | -3.816788 | -0.692797 |
| 60 | 7 | 0 | -14.301918 | -1.254852 | -0.299243 |
| 61 | 6 | 0 | -12.622783 | 2.882221  | 0.089196  |
| 62 | 6 | 0 | -12.565674 | 1.537492  | 0.168822  |
| 63 | 6 | 0 | -11.301647 | 0.969824  | 0.179368  |
| 64 | 6 | 0 | -10.163852 | 1.738195  | 0.359650  |
| 65 | 6 | 0 | -10.239855 | 3.073130  | 0.443612  |
| 66 | 6 | 0 | -11.440112 | 3.650816  | 0.141576  |
| 67 | 1 | 0 | -13.454734 | 0.944916  | 0.205904  |
| 68 | 1 | 0 | -9.392154  | 3.663218  | 0.720167  |
| 69 | 1 | 0 | -9.210034  | -2.618189 | -0.291551 |
| 70 | 1 | 0 | 9.415034   | -2.553905 | 0.118913  |
| 71 | 1 | 0 | -3.135426  | -4.970347 | -2.135437 |
| 72 | 1 | 0 | -4.882441  | -4.927985 | -2.166222 |
| 73 | 1 | 0 | -3.965067  | -3.504529 | -2.597610 |
| 74 | 1 | 0 | -4.080025  | -4.881925 | 1.425634  |
| 75 | 1 | 0 | -4.945606  | -5.733389 | 0.169197  |
| 76 | 1 | 0 | -3.199632  | -5.771607 | 0.205589  |
| 77 | 1 | 0 | 1.003157   | 0.989401  | 2.259000  |

|     |    |   |            |           |           |
|-----|----|---|------------|-----------|-----------|
| 78  | 1  | 0 | -0.740632  | 1.062389  | 2.179428  |
| 79  | 1  | 0 | 0.049961   | -0.416284 | 2.670145  |
| 80  | 1  | 0 | 1.144513   | 1.772276  | -0.088029 |
| 81  | 1  | 0 | 0.296943   | 0.923337  | -1.358799 |
| 82  | 1  | 0 | -0.598849  | 1.844034  | -0.174439 |
| 83  | 16 | 0 | 4.726916   | -5.105971 | 0.425748  |
| 84  | 6  | 0 | 5.935840   | -6.381643 | 0.111162  |
| 85  | 1  | 0 | 6.743606   | -6.284740 | 0.809290  |
| 86  | 1  | 0 | 5.480232   | -7.342936 | 0.226667  |
| 87  | 1  | 0 | 6.313145   | -6.282986 | -0.884476 |
| 88  | 6  | 0 | -11.505053 | 5.019893  | -0.133030 |
| 89  | 6  | 0 | -12.749008 | 5.657926  | -0.154623 |
| 90  | 6  | 0 | -13.926415 | 4.902696  | -0.079909 |
| 91  | 6  | 0 | -13.858997 | 3.509692  | -0.055018 |
| 92  | 6  | 0 | 13.260887  | 4.242785  | -0.167959 |
| 93  | 6  | 0 | 13.135811  | 5.641947  | -0.087739 |
| 94  | 6  | 0 | 11.868412  | 6.240393  | -0.105243 |
| 95  | 6  | 0 | 10.719824  | 5.443488  | -0.168351 |
| 96  | 1  | 0 | 14.234848  | 3.796846  | -0.176825 |
| 97  | 1  | 0 | 9.755451   | 5.906808  | -0.193245 |
| 98  | 1  | 0 | -10.607169 | 5.574000  | -0.327620 |
| 99  | 1  | 0 | -14.748322 | 2.923003  | -0.144282 |
| 100 | 9  | 0 | -12.811059 | 7.003347  | -0.246763 |
| 101 | 9  | 0 | -15.128081 | 5.516389  | -0.036526 |
| 102 | 9  | 0 | 14.236734  | 6.417455  | 0.007429  |
| 103 | 9  | 0 | 11.753644  | 7.584729  | -0.059534 |

### Cartesian coordinates of Designed Molecule IDST7

---

| Center<br>Number | Atomic<br>Number | Atomic<br>Type | Coordinates (Angstroms) |           |           |
|------------------|------------------|----------------|-------------------------|-----------|-----------|
|                  |                  |                | X                       | Y         | Z         |
| 1                | 6                | 0              | -1.109207               | -0.259575 | 0.201722  |
| 2                | 6                | 0              | -0.639690               | -1.595349 | 0.182304  |
| 3                | 6                | 0              | -1.532531               | -2.675335 | 0.011543  |
| 4                | 6                | 0              | -2.852561               | -2.342811 | -0.176300 |
| 5                | 6                | 0              | -3.322315               | -1.004065 | -0.115893 |
| 6                | 6                | 0              | -2.424673               | 0.076480  | 0.002793  |
| 7                | 1                | 0              | -1.200139               | -3.692532 | 0.013339  |
| 8                | 1                | 0              | -2.751177               | 1.094311  | -0.036103 |
| 9                | 6                | 0              | 0.095274                | 0.663239  | 0.491907  |
| 10               | 6                | 0              | 0.033483                | 1.169852  | 1.941950  |
| 11               | 6                | 0              | 0.189437                | 1.881899  | -0.442880 |
| 12               | 6                | 0              | -4.052620               | -3.280038 | -0.469196 |
| 13               | 6                | 0              | -4.029401               | -3.786117 | -1.922859 |
| 14               | 6                | 0              | -4.088741               | -4.507736 | 0.459910  |
| 15               | 6                | 0              | 0.789971                | -1.570876 | 0.325950  |
| 16               | 6                | 0              | 1.254035                | -0.320713 | 0.345739  |
| 17               | 6                | 0              | 2.659232                | -0.168853 | 0.227869  |
| 18               | 6                | 0              | 3.326565                | -1.426803 | 0.236090  |
| 19               | 16               | 0              | 2.114642                | -2.745574 | 0.448485  |
| 20               | 1                | 0              | 3.158460                | 0.773970  | 0.153829  |
| 21               | 6                | 0              | -4.754895               | -1.028229 | -0.148727 |
| 22               | 6                | 0              | -5.224598               | -2.308954 | -0.292353 |
| 23               | 6                | 0              | -6.627760               | -2.458378 | -0.255062 |

|    |    |   |            |           |           |
|----|----|---|------------|-----------|-----------|
| 24 | 6  | 0 | -7.296452  | -1.203919 | -0.148876 |
| 25 | 16 | 0 | -6.093709  | 0.128733  | 0.046078  |
| 26 | 1  | 0 | -7.135058  | -3.397559 | -0.324170 |
| 27 | 6  | 0 | 4.741883   | -1.580847 | 0.105231  |
| 28 | 6  | 0 | 5.454476   | -2.795988 | 0.265223  |
| 29 | 16 | 0 | 5.897393   | -0.264183 | -0.254473 |
| 30 | 6  | 0 | 6.865736   | -2.637282 | 0.219761  |
| 31 | 6  | 0 | 7.302545   | -1.312556 | 0.033790  |
| 32 | 1  | 0 | 7.544595   | -3.457949 | 0.320868  |
| 33 | 6  | 0 | 8.688924   | -0.982940 | 0.098795  |
| 34 | 6  | 0 | 10.778383  | 0.539542  | -0.045654 |
| 35 | 6  | 0 | 9.236607   | 0.273628  | 0.010450  |
| 36 | 6  | 0 | 8.519745   | 1.652515  | -0.052154 |
| 37 | 6  | 0 | 11.734748  | -0.412451 | -0.026052 |
| 38 | 6  | 0 | 11.349374  | -1.754048 | 0.078008  |
| 39 | 6  | 0 | 13.085426  | -0.062192 | -0.124724 |
| 40 | 8  | 0 | 7.288169   | 1.885473  | -0.000692 |
| 41 | 7  | 0 | 11.016975  | -2.846078 | 0.163676  |
| 42 | 7  | 0 | 14.193112  | 0.225062  | -0.205653 |
| 43 | 6  | 0 | -8.718154  | -1.114960 | -0.219647 |
| 44 | 6  | 0 | -10.997697 | 0.121842  | -0.139493 |
| 45 | 6  | 0 | -9.435363  | 0.037666  | -0.061412 |
| 46 | 6  | 0 | -8.882080  | 1.462149  | 0.216531  |
| 47 | 6  | 0 | -11.825884 | -0.938939 | -0.369353 |
| 48 | 6  | 0 | -11.251536 | -2.202295 | -0.577612 |
| 49 | 6  | 0 | -13.225803 | -0.806867 | -0.409600 |
| 50 | 8  | 0 | -7.687077  | 1.786084  | 0.408807  |
| 51 | 7  | 0 | -10.765326 | -3.227359 | -0.745667 |

|    |    |   |            |           |           |
|----|----|---|------------|-----------|-----------|
| 52 | 7  | 0 | -14.370213 | -0.722873 | -0.446932 |
| 53 | 1  | 0 | -9.264988  | -2.012080 | -0.415769 |
| 54 | 1  | 0 | 9.369951   | -1.797893 | 0.210079  |
| 55 | 1  | 0 | -3.163211  | -4.393448 | -2.076861 |
| 56 | 1  | 0 | -4.910717  | -4.368494 | -2.107158 |
| 57 | 1  | 0 | -4.006575  | -2.954213 | -2.593483 |
| 58 | 1  | 0 | -4.106176  | -4.178899 | 1.479329  |
| 59 | 1  | 0 | -4.962548  | -5.088172 | 0.257696  |
| 60 | 1  | 0 | -3.216392  | -5.104942 | 0.293131  |
| 61 | 1  | 0 | 0.917058   | 1.732824  | 2.159944  |
| 62 | 1  | 0 | -0.826530  | 1.792824  | 2.065814  |
| 63 | 1  | 0 | -0.030930  | 0.335100  | 2.608412  |
| 64 | 1  | 0 | 1.070843   | 2.441951  | -0.210299 |
| 65 | 1  | 0 | 0.237465   | 1.547597  | -1.459169 |
| 66 | 1  | 0 | -0.672146  | 2.500642  | -0.311504 |
| 67 | 16 | 0 | 4.702993   | -4.387061 | 0.541010  |
| 68 | 6  | 0 | 5.927290   | -5.662415 | 0.290261  |
| 69 | 1  | 0 | 6.721094   | -5.537192 | 1.000228  |
| 70 | 1  | 0 | 5.476712   | -6.623327 | 0.428329  |
| 71 | 1  | 0 | 6.322332   | -5.592337 | -0.700376 |
| 72 | 6  | 0 | -12.479279 | 2.357633  | 0.174208  |
| 73 | 6  | 0 | -11.355114 | 1.609195  | 0.072269  |
| 74 | 6  | 0 | -10.087301 | 2.406282  | 0.210391  |
| 75 | 6  | 0 | -10.262214 | 3.743447  | 0.285516  |
| 76 | 16 | 0 | -12.012532 | 4.082686  | 0.247495  |
| 77 | 1  | 0 | -13.476759 | 1.992463  | 0.209866  |
| 78 | 17 | 0 | -8.998351  | 4.961632  | 0.339767  |
| 79 | 6  | 0 | 12.007139  | 2.942641  | -0.218747 |

|    |    |   |           |          |           |
|----|----|---|-----------|----------|-----------|
| 80 | 6  | 0 | 10.972710 | 2.060793 | -0.156922 |
| 81 | 6  | 0 | 9.620696  | 2.704762 | -0.202113 |
| 82 | 6  | 0 | 9.634835  | 4.035917 | -0.352537 |
| 83 | 16 | 0 | 11.330485 | 4.572752 | -0.504834 |
| 84 | 1  | 0 | 13.045853 | 2.717000 | -0.121219 |
| 85 | 17 | 0 | 8.218594  | 5.066092 | -0.410831 |

Atomic coordinates of TD-DFT for all molecules (reference **IDSTR**, and investigated molecules **IDST1**, **IDST2**, **IDST3**, **IDST4**, **IDST5**, **IDST6** and **IDST7** along X, Y and Z axis at MPW1PW91/6-31G (d, p) level.

### Atomic coordinates of Designed Molecule **IDSTR**

| -----  |        |        |                         |           |           |
|--------|--------|--------|-------------------------|-----------|-----------|
| Center | Atomic | Atomic | Coordinates (Angstroms) |           |           |
| Number | Number | Type   | X                       | Y         | Z         |
| -----  |        |        |                         |           |           |
| 1      | 6      | 0      | -1.018145               | -0.137158 | 0.248365  |
| 2      | 6      | 0      | -0.583730               | -1.468807 | 0.021219  |
| 3      | 6      | 0      | -1.489207               | -2.506705 | -0.219099 |
| 4      | 6      | 0      | -2.837540               | -2.196872 | -0.230490 |
| 5      | 6      | 0      | -3.271062               | -0.867380 | -0.003495 |
| 6      | 6      | 0      | -2.363889               | 0.171650  | 0.237520  |
| 7      | 1      | 0      | -1.140458               | -3.519902 | -0.391718 |
| 8      | 1      | 0      | -2.713838               | 1.184611  | 0.409607  |
| 9      | 6      | 0      | 0.163577                | 0.800580  | 0.484758  |
| 10     | 6      | 0      | 0.107936                | 1.423612  | 1.888286  |
| 11     | 6      | 0      | 0.229661                | 1.899645  | -0.586910 |
| 12     | 6      | 0      | -4.017500               | -3.136401 | -0.469651 |
| 13     | 6      | 0      | -3.954897               | -3.764069 | -1.870704 |
| 14     | 6      | 0      | -4.087167               | -4.232126 | 0.605211  |
| 15     | 6      | 0      | 0.855624                | -1.444522 | 0.095239  |

|    |    |   |           |           |           |
|----|----|---|-----------|-----------|-----------|
| 16 | 6  | 0 | 1.317567  | -0.169009 | 0.355443  |
| 17 | 6  | 0 | 2.712597  | -0.102597 | 0.447912  |
| 18 | 6  | 0 | 3.323325  | -1.337710 | 0.253428  |
| 19 | 16 | 0 | 2.124426  | -2.588720 | -0.045234 |
| 20 | 1  | 0 | 3.279579  | 0.794030  | 0.666694  |
| 21 | 6  | 0 | -4.709038 | -0.880734 | -0.081023 |
| 22 | 6  | 0 | -5.170894 | -2.164765 | -0.347157 |
| 23 | 6  | 0 | -6.555561 | -2.213010 | -0.429718 |
| 24 | 6  | 0 | -7.167062 | -0.962977 | -0.226612 |
| 25 | 16 | 0 | -5.953399 | 0.282385  | 0.072465  |
| 26 | 1  | 0 | -7.147815 | -3.098908 | -0.628390 |
| 27 | 6  | 0 | 4.737404  | -1.586096 | 0.241207  |
| 28 | 6  | 0 | 5.456965  | -2.785337 | 0.371002  |
| 29 | 16 | 0 | 5.796789  | -0.221640 | 0.050014  |
| 30 | 6  | 0 | 6.837170  | -2.561391 | 0.334395  |
| 31 | 6  | 0 | 7.213152  | -1.226866 | 0.173932  |
| 32 | 1  | 0 | 7.583646  | -3.338830 | 0.431075  |
| 33 | 6  | 0 | 8.585132  | -0.879834 | 0.126105  |
| 34 | 6  | 0 | 10.705036 | 0.498272  | -0.040447 |
| 35 | 6  | 0 | 9.256834  | 0.310273  | -0.016106 |
| 36 | 6  | 0 | 8.627107  | 1.633686  | -0.176563 |
| 37 | 6  | 0 | 11.693002 | -0.455554 | 0.078608  |
| 38 | 6  | 0 | 11.439353 | -1.846810 | 0.253280  |
| 39 | 6  | 0 | 13.083322 | -0.146618 | 0.039668  |
| 40 | 8  | 0 | 7.435199  | 1.893182  | -0.207834 |
| 41 | 7  | 0 | 11.262954 | -2.987280 | 0.396514  |
| 42 | 7  | 0 | 14.225040 | 0.069943  | 0.012193  |
| 43 | 6  | 0 | 12.032588 | 4.053089  | -0.482479 |



|    |   |   |            |           |           |
|----|---|---|------------|-----------|-----------|
| 44 | 6 | 0 | 12.138022  | 2.682438  | -0.313215 |
| 45 | 6 | 0 | 10.955118  | 1.946177  | -0.219387 |
| 46 | 6 | 0 | 9.725019   | 2.611556  | -0.298493 |
| 47 | 6 | 0 | 9.617171   | 3.982037  | -0.468098 |
| 48 | 6 | 0 | 10.794432  | 4.701105  | -0.559650 |
| 49 | 1 | 0 | 13.126291  | 2.247327  | -0.262115 |
| 50 | 1 | 0 | 8.653093   | 4.472291  | -0.527553 |
| 51 | 9 | 0 | 10.780013  | 6.019907  | -0.722935 |
| 52 | 9 | 0 | 13.131571  | 4.794817  | -0.577184 |
| 53 | 6 | 0 | -8.574861  | -0.847252 | -0.279747 |
| 54 | 6 | 0 | -10.911854 | 0.128522  | -0.218253 |
| 55 | 6 | 0 | -9.456422  | 0.198291  | -0.128339 |
| 56 | 6 | 0 | -9.088323  | 1.596255  | 0.157797  |
| 57 | 6 | 0 | -11.703162 | -0.971364 | -0.474032 |
| 58 | 6 | 0 | -11.195743 | -2.283014 | -0.702653 |
| 59 | 6 | 0 | -13.125138 | -0.910524 | -0.537795 |
| 60 | 8 | 0 | -7.969355  | 2.060543  | 0.303315  |
| 61 | 7 | 0 | -10.813649 | -3.364774 | -0.892987 |
| 62 | 7 | 0 | -14.286039 | -0.897523 | -0.597045 |
| 63 | 6 | 0 | -12.885824 | 3.358022  | 0.307689  |
| 64 | 6 | 0 | -12.731163 | 2.005256  | 0.053315  |
| 65 | 6 | 0 | -11.431762 | 1.494630  | 0.019218  |
| 66 | 6 | 0 | -10.350624 | 2.356740  | 0.239902  |
| 67 | 6 | 0 | -10.502552 | 3.709705  | 0.493750  |
| 68 | 6 | 0 | -11.793069 | 4.204622  | 0.525623  |
| 69 | 1 | 0 | -13.618907 | 1.409412  | -0.106321 |
| 70 | 1 | 0 | -9.648445  | 4.354633  | 0.660834  |
| 71 | 9 | 0 | -12.026971 | 5.491580  | 0.762873  |

|    |    |   |            |           |           |
|----|----|---|------------|-----------|-----------|
| 72 | 9  | 0 | -14.104366 | 3.888827  | 0.349945  |
| 73 | 1  | 0 | -9.022109  | -1.813137 | -0.486099 |
| 74 | 1  | 0 | 9.203533   | -1.764662 | 0.224754  |
| 75 | 1  | 0 | -3.073648  | -4.403838 | -1.966398 |
| 76 | 1  | 0 | -4.838955  | -4.380835 | -2.052359 |
| 77 | 1  | 0 | -3.906841  | -2.995387 | -2.644619 |
| 78 | 1  | 0 | -4.130254  | -3.799354 | 1.606725  |
| 79 | 1  | 0 | -4.975502  | -4.852330 | 0.459867  |
| 80 | 1  | 0 | -3.210663  | -4.883136 | 0.549388  |
| 81 | 1  | 0 | 0.994490   | 2.037252  | 2.068898  |
| 82 | 1  | 0 | -0.771023  | 2.065603  | 1.989385  |
| 83 | 1  | 0 | 0.060648   | 0.652186  | 2.659490  |
| 84 | 1  | 0 | 1.120560   | 2.517053  | -0.444995 |
| 85 | 1  | 0 | 0.266083   | 1.469719  | -1.589880 |
| 86 | 1  | 0 | -0.644779  | 2.552710  | -0.524013 |
| 87 | 16 | 0 | 4.689529   | -4.354338 | 0.597840  |
| 88 | 6  | 0 | 6.110192   | -5.471659 | 0.614552  |
| 89 | 1  | 0 | 6.766631   | -5.276340 | 1.463760  |
| 90 | 1  | 0 | 5.689354   | -6.471842 | 0.721543  |
| 91 | 1  | 0 | 6.667944   | -5.423879 | -0.321624 |

### Atomic coordinates of Designed Molecule IDST1

| -----  |        |        |                         |           |           |
|--------|--------|--------|-------------------------|-----------|-----------|
| Center | Atomic | Atomic | Coordinates (Angstroms) |           |           |
| Number | Number | Type   | X                       | Y         | Z         |
| -----  |        |        |                         |           |           |
| 1      | 6      | 0      | 0.921211                | -1.102663 | -0.236327 |
| 2      | 6      | 0      | 0.490282                | -2.437131 | -0.018337 |
| 3      | 6      | 0      | 1.397154                | -3.470764 | 0.234974  |

|    |    |   |           |           |           |
|----|----|---|-----------|-----------|-----------|
| 4  | 6  | 0 | 2.743387  | -3.153856 | 0.268937  |
| 5  | 6  | 0 | 3.173511  | -1.821674 | 0.050819  |
| 6  | 6  | 0 | 2.264901  | -0.786897 | -0.203367 |
| 7  | 1  | 0 | 1.050907  | -4.485994 | 0.400570  |
| 8  | 1  | 0 | 2.612329  | 0.228192  | -0.367818 |
| 9  | 6  | 0 | -0.261541 | -0.170450 | -0.488904 |
| 10 | 6  | 0 | -0.187802 | 0.456459  | -1.889874 |
| 11 | 6  | 0 | -0.349896 | 0.925477  | 0.584381  |
| 12 | 6  | 0 | 3.924030  | -4.087587 | 0.526660  |
| 13 | 6  | 0 | 3.840900  | -4.718662 | 1.925070  |
| 14 | 6  | 0 | 4.018087  | -5.180378 | -0.549283 |
| 15 | 6  | 0 | -0.947657 | -2.420293 | -0.114750 |
| 16 | 6  | 0 | -1.412189 | -1.146446 | -0.379525 |
| 17 | 6  | 0 | -2.805749 | -1.086913 | -0.492255 |
| 18 | 6  | 0 | -3.413209 | -2.325610 | -0.308660 |
| 19 | 16 | 0 | -2.212394 | -3.571204 | 0.005164  |
| 20 | 1  | 0 | -3.373805 | -0.192484 | -0.717208 |
| 21 | 6  | 0 | 4.609803  | -1.827062 | 0.152930  |
| 22 | 6  | 0 | 5.073982  | -3.109429 | 0.425945  |
| 23 | 6  | 0 | 6.456477  | -3.149857 | 0.534339  |
| 24 | 6  | 0 | 7.064813  | -1.895576 | 0.343524  |
| 25 | 16 | 0 | 5.849673  | -0.656771 | 0.022117  |
| 26 | 1  | 0 | 7.050122  | -4.031980 | 0.745279  |
| 27 | 6  | 0 | -4.825841 | -2.580214 | -0.318124 |
| 28 | 6  | 0 | -5.538372 | -3.784165 | -0.450562 |
| 29 | 16 | 0 | -5.893550 | -1.218944 | -0.154297 |
| 30 | 6  | 0 | -6.919331 | -3.565960 | -0.437678 |
| 31 | 6  | 0 | -7.303739 | -2.231381 | -0.293119 |

|    |   |   |            |           |           |
|----|---|---|------------|-----------|-----------|
| 32 | 1 | 0 | -7.661088  | -4.346975 | -0.541311 |
| 33 | 6 | 0 | -8.676957  | -1.890283 | -0.272455 |
| 34 | 6 | 0 | -10.804328 | -0.516288 | -0.157529 |
| 35 | 6 | 0 | -9.356005  | -0.700684 | -0.150736 |
| 36 | 6 | 0 | -8.730973  | 0.623272  | 0.017721  |
| 37 | 6 | 0 | -11.786888 | -1.468406 | -0.320749 |
| 38 | 6 | 0 | -11.522255 | -2.856567 | -0.506727 |
| 39 | 6 | 0 | -13.180099 | -1.168913 | -0.334003 |
| 40 | 8 | 0 | -7.539971  | 0.882720  | 0.068808  |
| 41 | 7 | 0 | -11.336166 | -3.994284 | -0.659271 |
| 42 | 7 | 0 | -14.325972 | -0.976200 | -0.359035 |
| 43 | 6 | 0 | -12.164278 | 3.054568  | 0.286889  |
| 44 | 6 | 0 | -12.239609 | 1.669236  | 0.116377  |
| 45 | 6 | 0 | -11.061075 | 0.931740  | 0.031024  |
| 46 | 6 | 0 | -9.834050  | 1.600512  | 0.124736  |
| 47 | 6 | 0 | -9.745072  | 2.965555  | 0.312363  |
| 48 | 6 | 0 | -10.923644 | 3.704809  | 0.413815  |
| 49 | 1 | 0 | -13.220712 | 1.219081  | 0.050140  |
| 50 | 1 | 0 | -8.782036  | 3.455656  | 0.394461  |
| 51 | 6 | 0 | 8.469321   | -1.771858 | 0.429669  |
| 52 | 6 | 0 | 10.801092  | -0.779775 | 0.427549  |
| 53 | 6 | 0 | 9.348934   | -0.720674 | 0.296303  |
| 54 | 6 | 0 | 8.977705   | 0.670068  | -0.016678 |
| 55 | 6 | 0 | 11.589668  | -1.862993 | 0.750959  |
| 56 | 6 | 0 | 11.078560  | -3.167710 | 1.011188  |
| 57 | 6 | 0 | 13.007745  | -1.796574 | 0.875279  |
| 58 | 8 | 0 | 7.858557   | 1.122792  | -0.192064 |
| 59 | 7 | 0 | 10.692715  | -4.243115 | 1.228085  |

|    |    |   |           |           |           |
|----|----|---|-----------|-----------|-----------|
| 60 | 7  | 0 | 14.163811 | -1.794536 | 0.995602  |
| 61 | 6  | 0 | 12.791293 | 2.464377  | -0.137028 |
| 62 | 6  | 0 | 12.611697 | 1.105307  | 0.135947  |
| 63 | 6  | 0 | 11.320198 | 0.584304  | 0.163412  |
| 64 | 6  | 0 | 10.239202 | 1.437566  | -0.089214 |
| 65 | 6  | 0 | 10.402860 | 2.777639  | -0.378460 |
| 66 | 6  | 0 | 11.695937 | 3.299090  | -0.422843 |
| 67 | 1  | 0 | 13.491708 | 0.505455  | 0.323808  |
| 68 | 1  | 0 | 9.548455  | 3.412350  | -0.582256 |
| 69 | 1  | 0 | 8.916949  | -2.734914 | 0.647876  |
| 70 | 1  | 0 | -9.290020 | -2.778356 | -0.374869 |
| 71 | 1  | 0 | 2.961996  | -5.363919 | 2.004157  |
| 72 | 1  | 0 | 4.725393  | -5.330539 | 2.120610  |
| 73 | 1  | 0 | 3.774947  | -3.952005 | 2.699666  |
| 74 | 1  | 0 | 4.076514  | -4.744971 | -1.548867 |
| 75 | 1  | 0 | 4.906836  | -5.796450 | -0.389710 |
| 76 | 1  | 0 | 3.143998  | -5.835836 | -0.510199 |
| 77 | 1  | 0 | -1.074914 | 1.065617  | -2.082351 |
| 78 | 1  | 0 | 0.688892  | 1.103721  | -1.975719 |
| 79 | 1  | 0 | -0.124337 | -0.312631 | -2.662263 |
| 80 | 1  | 0 | -1.241578 | 1.538692  | 0.430097  |
| 81 | 1  | 0 | -0.399627 | 0.492775  | 1.585577  |
| 82 | 1  | 0 | 0.522026  | 1.583122  | 0.536535  |
| 83 | 16 | 0 | -4.760803 | -5.351384 | -0.653035 |
| 84 | 6  | 0 | -6.176041 | -6.475418 | -0.678214 |
| 85 | 1  | 0 | -6.821250 | -6.291949 | -1.538599 |
| 86 | 1  | 0 | -5.749295 | -7.474721 | -0.768729 |
| 87 | 1  | 0 | -6.747139 | -6.420239 | 0.249474  |

|     |   |   |            |          |           |
|-----|---|---|------------|----------|-----------|
| 88  | 6 | 0 | 11.816383  | 4.727106 | -0.846214 |
| 89  | 6 | 0 | 14.201778  | 2.958176 | -0.044343 |
| 90  | 6 | 0 | 13.031588  | 6.268964 | -2.106145 |
| 91  | 6 | 0 | 15.600527  | 4.626475 | 0.788988  |
| 92  | 8 | 0 | 11.008149  | 5.579550 | -0.563998 |
| 93  | 8 | 0 | 15.156446  | 2.349557 | -0.461684 |
| 94  | 8 | 0 | 14.278234  | 4.107769 | 0.637357  |
| 95  | 8 | 0 | 12.870360  | 4.926530 | -1.645995 |
| 96  | 1 | 0 | 13.187593  | 6.945041 | -1.263926 |
| 97  | 1 | 0 | 13.904680  | 6.254612 | -2.754802 |
| 98  | 1 | 0 | 12.147646  | 6.591639 | -2.658029 |
| 99  | 1 | 0 | 15.494410  | 5.535555 | 1.376958  |
| 100 | 1 | 0 | 16.235921  | 3.905887 | 1.305722  |
| 101 | 1 | 0 | 16.038431  | 4.846636 | -0.186030 |
| 102 | 6 | 0 | -10.765069 | 5.158587 | 0.722224  |
| 103 | 6 | 0 | -13.475092 | 3.778420 | 0.266433  |
| 104 | 6 | 0 | -11.584440 | 6.971541 | 1.940773  |
| 105 | 6 | 0 | -14.647454 | 5.601115 | -0.592809 |
| 106 | 8 | 0 | -9.855093  | 5.835164 | 0.305589  |
| 107 | 8 | 0 | -14.472948 | 3.377124 | 0.813202  |
| 108 | 8 | 0 | -11.692729 | 5.592944 | 1.582505  |
| 109 | 1 | 0 | -10.607391 | 7.175147 | 2.380984  |
| 110 | 1 | 0 | -11.714899 | 7.605405 | 1.062137  |
| 111 | 1 | 0 | -12.376458 | 7.150278 | 2.664612  |
| 112 | 1 | 0 | -14.450329 | 6.425407 | -1.274751 |
| 113 | 1 | 0 | -15.444917 | 4.964569 | -0.978450 |
| 114 | 1 | 0 | -14.938909 | 5.975110 | 0.390074  |
| 115 | 8 | 0 | -13.422856 | 4.870386 | -0.505672 |

## Atomic coordinates of Designed Molecule IDST2

| Center<br>Number | Atomic<br>Number | Atomic<br>Type | Coordinates (Angstroms) |           |           |
|------------------|------------------|----------------|-------------------------|-----------|-----------|
|                  |                  |                | X                       | Y         | Z         |
| 1                | 6                | 0              | 0.948248                | -0.823016 | -0.204453 |
| 2                | 6                | 0              | 0.513317                | -2.159957 | -0.008317 |
| 3                | 6                | 0              | 1.417141                | -3.202532 | 0.218562  |
| 4                | 6                | 0              | 2.764977                | -2.892410 | 0.247720  |
| 5                | 6                | 0              | 3.198837                | -1.557836 | 0.051334  |
| 6                | 6                | 0              | 2.293288                | -0.513943 | -0.175978 |
| 7                | 1                | 0              | 1.067330                | -4.219088 | 0.367338  |
| 8                | 1                | 0              | 2.644304                | 0.502355  | -0.324255 |
| 9                | 6                | 0              | -0.231833               | 0.118871  | -0.431374 |
| 10               | 6                | 0              | -0.164764               | 0.771952  | -1.820741 |
| 11               | 6                | 0              | -0.308496               | 1.194579  | 0.663210  |
| 12               | 6                | 0              | 3.943504                | -3.836067 | 0.477351  |
| 13               | 6                | 0              | 3.870476                | -4.491938 | 1.864960  |
| 14               | 6                | 0              | 4.022674                | -4.909614 | -0.619079 |
| 15               | 6                | 0              | -0.924775               | -2.135510 | -0.094658 |
| 16               | 6                | 0              | -1.385620               | -0.854385 | -0.332671 |
| 17               | 6                | 0              | -2.778854               | -0.787001 | -0.433968 |
| 18               | 6                | 0              | -3.390772               | -2.026940 | -0.268750 |
| 19               | 16               | 0              | -2.192950               | -3.283202 | 0.012951  |
| 20               | 1                | 0              | -3.343998               | 0.114396  | -0.637425 |
| 21               | 6                | 0              | 4.635201                | -1.571024 | 0.139582  |
| 22               | 6                | 0              | 5.096946                | -2.861233 | 0.383565  |

|    |    |   |            |           |           |
|----|----|---|------------|-----------|-----------|
| 23 | 6  | 0 | 6.479374   | -2.909274 | 0.474770  |
| 24 | 6  | 0 | 7.091431   | -1.652914 | 0.300244  |
| 25 | 16 | 0 | 5.877069   | -0.402948 | 0.017676  |
| 26 | 1  | 0 | 7.071804   | -3.798007 | 0.659755  |
| 27 | 6  | 0 | -4.803671  | -2.274490 | -0.275377 |
| 28 | 6  | 0 | -5.522602  | -3.476959 | -0.402897 |
| 29 | 16 | 0 | -5.864586  | -0.907906 | -0.113763 |
| 30 | 6  | 0 | -6.901432  | -3.252520 | -0.386859 |
| 31 | 6  | 0 | -7.280046  | -1.914854 | -0.244927 |
| 32 | 1  | 0 | -7.646944  | -4.030687 | -0.484955 |
| 33 | 6  | 0 | -8.649687  | -1.568385 | -0.218495 |
| 34 | 6  | 0 | -10.769961 | -0.185709 | -0.094449 |
| 35 | 6  | 0 | -9.323883  | -0.373585 | -0.097871 |
| 36 | 6  | 0 | -8.691740  | 0.947409  | 0.055033  |
| 37 | 6  | 0 | -11.759836 | -1.136918 | -0.214786 |
| 38 | 6  | 0 | -11.504504 | -2.530430 | -0.369689 |
| 39 | 6  | 0 | -13.150758 | -0.828774 | -0.197930 |
| 40 | 8  | 0 | -7.500211  | 1.204250  | 0.098876  |
| 41 | 7  | 0 | -11.324213 | -3.672084 | -0.496986 |
| 42 | 7  | 0 | -14.294079 | -0.619950 | -0.189054 |
| 43 | 6  | 0 | -12.112383 | 3.406313  | 0.293312  |
| 44 | 6  | 0 | -12.193212 | 2.011886  | 0.136130  |
| 45 | 6  | 0 | -11.020089 | 1.268542  | 0.064984  |
| 46 | 6  | 0 | -9.790508  | 1.932716  | 0.151712  |
| 47 | 6  | 0 | -9.695216  | 3.300297  | 0.305867  |
| 48 | 6  | 0 | -10.862597 | 4.059929  | 0.379082  |
| 49 | 1  | 0 | -13.173071 | 1.559832  | 0.075617  |
| 50 | 1  | 0 | -8.733343  | 3.794791  | 0.371651  |



|    |   |   |           |           |           |
|----|---|---|-----------|-----------|-----------|
| 51 | 6 | 0 | 8.495903  | -1.537661 | 0.364021  |
| 52 | 6 | 0 | 10.831470 | -0.555679 | 0.331850  |
| 53 | 6 | 0 | 9.378654  | -0.485765 | 0.236378  |
| 54 | 6 | 0 | 9.005291  | 0.913292  | -0.026594 |
| 55 | 6 | 0 | 11.626611 | -1.655265 | 0.574459  |
| 56 | 6 | 0 | 11.119443 | -2.970853 | 0.781261  |
| 57 | 6 | 0 | 13.048254 | -1.595396 | 0.646398  |
| 58 | 8 | 0 | 7.885819  | 1.376171  | -0.167724 |
| 59 | 7 | 0 | 10.734962 | -4.054715 | 0.953305  |
| 60 | 7 | 0 | 14.208670 | -1.590272 | 0.713002  |
| 61 | 6 | 0 | 12.820219 | 2.713099  | -0.140782 |
| 62 | 6 | 0 | 12.639628 | 1.338839  | 0.092753  |
| 63 | 6 | 0 | 11.349876 | 0.819098  | 0.117303  |
| 64 | 6 | 0 | 10.267818 | 1.681957  | -0.092311 |
| 65 | 6 | 0 | 10.428844 | 3.032482  | -0.322110 |
| 66 | 6 | 0 | 11.715721 | 3.569423  | -0.349392 |
| 67 | 1 | 0 | 13.516823 | 0.726344  | 0.246284  |
| 68 | 1 | 0 | 9.576739  | 3.682420  | -0.481923 |
| 69 | 1 | 0 | 8.943763  | -2.506461 | 0.554637  |
| 70 | 1 | 0 | -9.267724 | -2.453626 | -0.315215 |
| 71 | 1 | 0 | 2.989666  | -5.134980 | 1.940040  |
| 72 | 1 | 0 | 4.753971  | -5.110978 | 2.041234  |
| 73 | 1 | 0 | 3.814647  | -3.739460 | 2.654114  |
| 74 | 1 | 0 | 4.073324  | -4.456847 | -1.611337 |
| 75 | 1 | 0 | 4.910081  | -5.532314 | -0.479188 |
| 76 | 1 | 0 | 3.146250  | -5.562035 | -0.583042 |
| 77 | 1 | 0 | -1.050844 | 1.387716  | -1.995870 |
| 78 | 1 | 0 | 0.713461  | 1.417940  | -1.899607 |

|     |    |   |            |           |           |
|-----|----|---|------------|-----------|-----------|
| 79  | 1  | 0 | -0.108764  | 0.017748  | -2.608229 |
| 80  | 1  | 0 | -1.198645  | 1.814165  | 0.526808  |
| 81  | 1  | 0 | -0.352928  | 0.743501  | 1.656506  |
| 82  | 1  | 0 | 0.565552   | 1.849725  | 0.621366  |
| 83  | 16 | 0 | -4.752647  | -5.047688 | -0.601084 |
| 84  | 6  | 0 | -6.172413  | -6.166081 | -0.619364 |
| 85  | 1  | 0 | -6.818399  | -5.982842 | -1.479187 |
| 86  | 1  | 0 | -5.749595  | -7.167231 | -0.707583 |
| 87  | 1  | 0 | -6.740955  | -6.105695 | 0.309552  |
| 88  | 6  | 0 | 11.798350  | 5.041152  | -0.604987 |
| 89  | 6  | 0 | 14.182829  | 3.159165  | -0.150509 |
| 90  | 6  | 0 | 13.197819  | 6.897949  | -0.844384 |
| 91  | 8  | 0 | 10.820504  | 5.729694  | -0.789541 |
| 92  | 8  | 0 | 13.046696  | 5.496976  | -0.604764 |
| 93  | 1  | 0 | 12.679443  | 7.471355  | -0.074737 |
| 94  | 1  | 0 | 14.268534  | 7.083159  | -0.810041 |
| 95  | 1  | 0 | 12.789131  | 7.161049  | -1.820881 |
| 96  | 6  | 0 | -10.667372 | 5.533973  | 0.546986  |
| 97  | 6  | 0 | -13.371378 | 4.089351  | 0.356426  |
| 98  | 6  | 0 | -11.700998 | 7.617423  | 0.784618  |
| 99  | 8  | 0 | -9.572871  | 6.046529  | 0.606541  |
| 100 | 8  | 0 | -11.813620 | 6.201548  | 0.622743  |
| 101 | 1  | 0 | -11.170638 | 7.851223  | 1.708676  |
| 102 | 1  | 0 | -11.160611 | 8.052705  | -0.056960 |
| 103 | 1  | 0 | -12.723061 | 7.986142  | 0.821065  |
| 104 | 7  | 0 | 15.315516  | 3.409522  | -0.138051 |
| 105 | 7  | 0 | -14.441210 | 4.536295  | 0.394536  |

### Atomic coordinates of Designed Molecule IDST3

---

| Center<br>Number | Atomic<br>Number | Atomic<br>Type | Coordinates (Angstroms) |           |           |
|------------------|------------------|----------------|-------------------------|-----------|-----------|
|                  |                  |                | X                       | Y         | Z         |
| 1                | 6                | 0              | 0.995616                | -0.353332 | -0.216114 |
| 2                | 6                | 0              | 0.563239                | -1.690853 | -0.016436 |
| 3                | 6                | 0              | 1.468856                | -2.733446 | 0.203060  |
| 4                | 6                | 0              | 2.816648                | -2.422968 | 0.221257  |
| 5                | 6                | 0              | 3.248162                | -1.087918 | 0.021079  |
| 6                | 6                | 0              | 2.340581                | -0.043913 | -0.198857 |
| 7                | 1                | 0              | 1.120467                | -3.750002 | 0.354772  |
| 8                | 1                | 0              | 2.690088                | 0.972442  | -0.350049 |
| 9                | 6                | 0              | -0.186770               | 0.588001  | -0.433056 |
| 10               | 6                | 0              | -0.131860               | 1.240829  | -1.823155 |
| 11               | 6                | 0              | -0.254785               | 1.663758  | 0.662134  |
| 12               | 6                | 0              | 3.996789                | -3.366482 | 0.441781  |
| 13               | 6                | 0              | 3.934827                | -4.021959 | 1.830197  |
| 14               | 6                | 0              | 4.067780                | -4.440197 | -0.655172 |
| 15               | 6                | 0              | -0.875166               | -1.667496 | -0.090838 |
| 16               | 6                | 0              | -1.338989               | -0.386085 | -0.324446 |
| 17               | 6                | 0              | -2.732641               | -0.320174 | -0.412952 |
| 18               | 6                | 0              | -3.341851               | -1.561460 | -0.242979 |
| 19               | 16               | 0              | -2.140395               | -2.816686 | 0.027085  |
| 20               | 1                | 0              | -3.300374               | 0.580759  | -0.611178 |
| 21               | 6                | 0              | 4.684656                | -1.100568 | 0.097752  |
| 22               | 6                | 0              | 5.149051                | -2.391420 | 0.338671  |
| 23               | 6                | 0              | 6.531169                | -2.439117 | 0.419111  |

|    |    |   |            |           |           |
|----|----|---|------------|-----------|-----------|
| 24 | 6  | 0 | 7.142046   | -1.181812 | 0.239236  |
| 25 | 16 | 0 | 5.924550   | 0.067898  | -0.034502 |
| 26 | 1  | 0 | 7.125218   | -3.327617 | 0.599929  |
| 27 | 6  | 0 | -4.753706  | -1.810613 | -0.237760 |
| 28 | 6  | 0 | -5.471611  | -3.015982 | -0.357456 |
| 29 | 16 | 0 | -5.815557  | -0.446089 | -0.069503 |
| 30 | 6  | 0 | -6.849779  | -2.794300 | -0.330735 |
| 31 | 6  | 0 | -7.230547  | -1.456361 | -0.187738 |
| 32 | 1  | 0 | -7.594435  | -3.574150 | -0.421798 |
| 33 | 6  | 0 | -8.598867  | -1.113190 | -0.150739 |
| 34 | 6  | 0 | -10.721631 | 0.265696  | -0.011208 |
| 35 | 6  | 0 | -9.275627  | 0.081699  | -0.025585 |
| 36 | 6  | 0 | -8.645899  | 1.401189  | 0.121926  |
| 37 | 6  | 0 | -11.710885 | -0.687019 | -0.123882 |
| 38 | 6  | 0 | -11.453785 | -2.079930 | -0.280647 |
| 39 | 6  | 0 | -13.101610 | -0.379323 | -0.096079 |
| 40 | 8  | 0 | -7.456336  | 1.668776  | 0.157053  |
| 41 | 7  | 0 | -11.270628 | -3.220884 | -0.409207 |
| 42 | 7  | 0 | -14.243828 | -0.165332 | -0.077519 |
| 43 | 6  | 0 | -12.068591 | 3.847197  | 0.384353  |
| 44 | 6  | 0 | -12.154576 | 2.457989  | 0.229100  |
| 45 | 6  | 0 | -10.976725 | 1.719422  | 0.149866  |
| 46 | 6  | 0 | -9.747133  | 2.385290  | 0.227416  |
| 47 | 6  | 0 | -9.640088  | 3.752455  | 0.380822  |
| 48 | 6  | 0 | -10.816926 | 4.501323  | 0.460878  |
| 49 | 1  | 0 | -13.134282 | 2.004693  | 0.176093  |
| 50 | 1  | 0 | -8.667737  | 4.226702  | 0.437531  |
| 51 | 6  | 0 | 8.545109   | -1.066377 | 0.292488  |

|    |   |   |           |           |           |
|----|---|---|-----------|-----------|-----------|
| 52 | 6 | 0 | 10.880835 | -0.083884 | 0.243495  |
| 53 | 6 | 0 | 9.427898  | -0.013249 | 0.157846  |
| 54 | 6 | 0 | 9.052876  | 1.382810  | -0.102970 |
| 55 | 6 | 0 | 11.678246 | -1.183044 | 0.479974  |
| 56 | 6 | 0 | 11.172624 | -2.498732 | 0.689568  |
| 57 | 6 | 0 | 13.100176 | -1.120705 | 0.541270  |
| 58 | 8 | 0 | 7.935614  | 1.852895  | -0.238354 |
| 59 | 7 | 0 | 10.788183 | -3.582183 | 0.863571  |
| 60 | 7 | 0 | 14.261013 | -1.108070 | 0.598139  |
| 61 | 6 | 0 | 12.864842 | 3.177033  | -0.240040 |
| 62 | 6 | 0 | 12.693364 | 1.807092  | -0.005287 |
| 63 | 6 | 0 | 11.400598 | 1.290334  | 0.025974  |
| 64 | 6 | 0 | 10.316294 | 2.152456  | -0.177164 |
| 65 | 6 | 0 | 10.462747 | 3.504722  | -0.409156 |
| 66 | 6 | 0 | 11.756251 | 4.031686  | -0.442559 |
| 67 | 1 | 0 | 13.571930 | 1.195518  | 0.143686  |
| 68 | 1 | 0 | 9.594942  | 4.135169  | -0.560996 |
| 69 | 1 | 0 | 8.995365  | -2.034552 | 0.480385  |
| 70 | 1 | 0 | -9.216509 | -1.999296 | -0.241539 |
| 71 | 1 | 0 | 3.054583  | -4.664817 | 1.912153  |
| 72 | 1 | 0 | 4.819407  | -4.641321 | 1.999393  |
| 73 | 1 | 0 | 3.885357  | -3.269572 | 2.619846  |
| 74 | 1 | 0 | 4.110530  | -3.987981 | -1.648046 |
| 75 | 1 | 0 | 4.956238  | -5.062765 | -0.521880 |
| 76 | 1 | 0 | 3.191899  | -5.092808 | -0.611947 |
| 77 | 1 | 0 | -1.019429 | 1.856471  | -1.990715 |
| 78 | 1 | 0 | 0.745365  | 1.887135  | -1.909462 |
| 79 | 1 | 0 | -0.082361 | 0.486764  | -2.611191 |

|    |    |   |            |           |           |
|----|----|---|------------|-----------|-----------|
| 80 | 1  | 0 | -1.146344  | 2.282842  | 0.533083  |
| 81 | 1  | 0 | -0.290382  | 1.213130  | 1.655982  |
| 82 | 1  | 0 | 0.618259   | 2.319625  | 0.612571  |
| 83 | 16 | 0 | -4.699493  | -4.584479 | -0.558902 |
| 84 | 6  | 0 | -6.116720  | -5.706136 | -0.571714 |
| 85 | 1  | 0 | -6.767004  | -5.523129 | -1.428313 |
| 86 | 1  | 0 | -5.691677  | -6.705986 | -0.663625 |
| 87 | 1  | 0 | -6.680472  | -5.648771 | 0.360285  |
| 88 | 6  | 0 | 11.944608  | 5.427747  | -0.681091 |
| 89 | 6  | 0 | 14.191772  | 3.709068  | -0.273085 |
| 90 | 6  | 0 | -10.742513 | 5.919281  | 0.619483  |
| 91 | 6  | 0 | -13.277399 | 4.606762  | 0.465779  |
| 92 | 7  | 0 | 15.273819  | 4.126149  | -0.297083 |
| 93 | 7  | 0 | -14.266570 | 5.208995  | 0.530346  |
| 94 | 7  | 0 | 12.065258  | 6.564776  | -0.876991 |
| 95 | 7  | 0 | -10.649307 | 7.068421  | 0.748011  |

**Atomic coordinates of Designed Molecule IDST4**

| -----  |        |        |                         |           |           |
|--------|--------|--------|-------------------------|-----------|-----------|
| Center | Atomic | Atomic | Coordinates (Angstroms) |           |           |
| Number | Number | Type   | X                       | Y         | Z         |
| -----  |        |        |                         |           |           |
| 1      | 6      | 0      | 0.990201                | -0.409548 | -0.228619 |
| 2      | 6      | 0      | 0.556560                | -1.742313 | -0.006826 |
| 3      | 6      | 0      | 1.462923                | -2.778675 | 0.237269  |
| 4      | 6      | 0      | 2.810592                | -2.466166 | 0.257653  |
| 5      | 6      | 0      | 3.243208                | -1.135500 | 0.036059  |
| 6      | 6      | 0      | 2.335220                | -0.098056 | -0.208566 |
| 7      | 1      | 0      | 1.115205                | -3.792974 | 0.405649  |

|    |    |   |            |           |           |
|----|----|---|------------|-----------|-----------|
| 8  | 1  | 0 | 2.684278   | 0.915922  | -0.376554 |
| 9  | 6  | 0 | -0.191635  | 0.526476  | -0.470942 |
| 10 | 6  | 0 | -0.127817  | 1.152645  | -1.872654 |
| 11 | 6  | 0 | -0.266799  | 1.623066  | 0.602575  |
| 12 | 6  | 0 | 3.991277   | -3.403716 | 0.501674  |
| 13 | 6  | 0 | 3.922156   | -4.034233 | 1.901087  |
| 14 | 6  | 0 | 4.069103   | -4.497243 | -0.574761 |
| 15 | 6  | 0 | -0.882438  | -1.720339 | -0.090243 |
| 16 | 6  | 0 | -1.344770  | -0.445292 | -0.351352 |
| 17 | 6  | 0 | -2.739265  | -0.380544 | -0.453603 |
| 18 | 6  | 0 | -3.349914  | -1.616519 | -0.265348 |
| 19 | 16 | 0 | -2.151131  | -2.866419 | 0.039533  |
| 20 | 1  | 0 | -3.306097  | 0.515605  | -0.674612 |
| 21 | 6  | 0 | 4.680825   | -1.145713 | 0.121600  |
| 22 | 6  | 0 | 5.143449   | -2.429495 | 0.387466  |
| 23 | 6  | 0 | 6.527796   | -2.475207 | 0.476719  |
| 24 | 6  | 0 | 7.138135   | -1.223564 | 0.278893  |
| 25 | 16 | 0 | 5.923591   | 0.020541  | -0.023122 |
| 26 | 1  | 0 | 7.121260   | -3.360111 | 0.676215  |
| 27 | 6  | 0 | -4.764047  | -1.865737 | -0.263630 |
| 28 | 6  | 0 | -5.482103  | -3.064996 | -0.399388 |
| 29 | 16 | 0 | -5.825123  | -0.501124 | -0.080050 |
| 30 | 6  | 0 | -6.862595  | -2.841329 | -0.373471 |
| 31 | 6  | 0 | -7.240191  | -1.506834 | -0.215555 |
| 32 | 1  | 0 | -7.608581  | -3.618422 | -0.476289 |
| 33 | 6  | 0 | -8.613398  | -1.161664 | -0.180007 |
| 34 | 6  | 0 | -10.737673 | 0.213182  | -0.034551 |
| 35 | 6  | 0 | -9.287979  | 0.028037  | -0.043790 |

|    |   |   |            |           |           |
|----|---|---|------------|-----------|-----------|
| 36 | 6 | 0 | -8.654472  | 1.350335  | 0.124299  |
| 37 | 6 | 0 | -11.719156 | -0.749266 | -0.166913 |
| 38 | 6 | 0 | -11.456475 | -2.138147 | -0.340784 |
| 39 | 6 | 0 | -13.111463 | -0.450479 | -0.144138 |
| 40 | 8 | 0 | -7.458024  | 1.594647  | 0.165827  |
| 41 | 7 | 0 | -11.272326 | -3.277853 | -0.483758 |
| 42 | 7 | 0 | -14.255818 | -0.245063 | -0.130466 |
| 43 | 6 | 0 | -12.094890 | 3.792833  | 0.402545  |
| 44 | 6 | 0 | -12.159324 | 2.385912  | 0.226050  |
| 45 | 6 | 0 | -10.993710 | 1.657669  | 0.143606  |
| 46 | 6 | 0 | -9.745757  | 2.332258  | 0.237310  |
| 47 | 6 | 0 | -9.644526  | 3.683467  | 0.407701  |
| 48 | 6 | 0 | -10.828706 | 4.455819  | 0.495144  |
| 49 | 1 | 0 | -13.135493 | 1.924297  | 0.161371  |
| 50 | 1 | 0 | -8.668003  | 4.152009  | 0.474899  |
| 51 | 6 | 0 | 8.545977   | -1.107781 | 0.337209  |
| 52 | 6 | 0 | 10.884511  | -0.134221 | 0.280760  |
| 53 | 6 | 0 | 9.428497   | -0.061823 | 0.189109  |
| 54 | 6 | 0 | 9.054531   | 1.336049  | -0.097250 |
| 55 | 6 | 0 | 11.669161  | -1.240573 | 0.542951  |
| 56 | 6 | 0 | 11.155097  | -2.547905 | 0.776535  |
| 57 | 6 | 0 | 13.090823  | -1.189582 | 0.609579  |
| 58 | 8 | 0 | 7.927770   | 1.786467  | -0.239294 |
| 59 | 7 | 0 | 10.766981  | -3.627212 | 0.971121  |
| 60 | 7 | 0 | 14.251966  | -1.187824 | 0.671892  |
| 61 | 6 | 0 | 12.888350  | 3.113035  | -0.262343 |
| 62 | 6 | 0 | 12.688244  | 1.732352  | -0.000276 |
| 63 | 6 | 0 | 11.407956  | 1.227393  | 0.039640  |



|    |    |   |           |           |           |
|----|----|---|-----------|-----------|-----------|
| 64 | 6  | 0 | 10.310008 | 2.101921  | -0.183297 |
| 65 | 6  | 0 | 10.463146 | 3.434954  | -0.436297 |
| 66 | 6  | 0 | 11.769863 | 3.979862  | -0.482789 |
| 67 | 1  | 0 | 13.559945 | 1.112495  | 0.161212  |
| 68 | 1  | 0 | 9.592092  | 4.061294  | -0.599637 |
| 69 | 1  | 0 | 8.991582  | -2.074393 | 0.543422  |
| 70 | 1  | 0 | -9.228841 | -2.047782 | -0.284718 |
| 71 | 1  | 0 | 3.041860  | -4.676272 | 1.990771  |
| 72 | 1  | 0 | 4.806799  | -4.649041 | 2.086622  |
| 73 | 1  | 0 | 3.868012  | -3.266976 | 2.676025  |
| 74 | 1  | 0 | 4.116757  | -4.062240 | -1.575107 |
| 75 | 1  | 0 | 4.958148  | -5.115614 | -0.425863 |
| 76 | 1  | 0 | 3.193727  | -5.150346 | -0.525087 |
| 77 | 1  | 0 | -1.014499 | 1.764760  | -2.057986 |
| 78 | 1  | 0 | 0.750634  | 1.796482  | -1.966660 |
| 79 | 1  | 0 | -0.073877 | 0.382789  | -2.644998 |
| 80 | 1  | 0 | -1.157998 | 2.239064  | 0.456250  |
| 81 | 1  | 0 | -0.309117 | 1.190592  | 1.604220  |
| 82 | 1  | 0 | 0.606981  | 2.277752  | 0.547064  |
| 83 | 16 | 0 | -4.712801 | -4.634148 | -0.620562 |
| 84 | 6  | 0 | -6.133177 | -5.751747 | -0.644039 |
| 85 | 1  | 0 | -6.784473 | -5.558024 | -1.497564 |
| 86 | 1  | 0 | -5.711855 | -6.752244 | -0.746220 |
| 87 | 1  | 0 | -6.697043 | -5.701613 | 0.288345  |
| 88 | 6  | 0 | 12.003352 | 5.350820  | -0.741334 |
| 89 | 6  | 0 | 13.283005 | 5.848245  | -0.782558 |
| 90 | 6  | 0 | 14.386998 | 4.995552  | -0.566164 |
| 91 | 6  | 0 | 14.193999 | 3.659928  | -0.311836 |

|     |   |   |            |          |           |
|-----|---|---|------------|----------|-----------|
| 92  | 6 | 0 | -13.277452 | 4.567397 | 0.490311  |
| 93  | 6 | 0 | -13.214398 | 5.928525 | 0.661232  |
| 94  | 6 | 0 | -11.965387 | 6.579889 | 0.752498  |
| 95  | 6 | 0 | -10.799002 | 5.859062 | 0.671305  |
| 96  | 1 | 0 | -14.236423 | 4.064594 | 0.419697  |
| 97  | 1 | 0 | -14.127780 | 6.509276 | 0.726866  |
| 98  | 1 | 0 | -11.930425 | 7.655301 | 0.887711  |
| 99  | 1 | 0 | -9.837123  | 6.356451 | 0.741520  |
| 100 | 1 | 0 | 13.450009  | 6.901051 | -0.982019 |
| 101 | 1 | 0 | 11.152223  | 6.003179 | -0.907411 |
| 102 | 1 | 0 | 15.392190  | 5.400833 | -0.601555 |
| 103 | 1 | 0 | 15.041075  | 3.002602 | -0.144883 |

#### Atomic coordinates of Designed Molecule IDST5

| -----  |        |        |                         |           |           |
|--------|--------|--------|-------------------------|-----------|-----------|
| Center | Atomic | Atomic | Coordinates (Angstroms) |           |           |
| Number | Number | Type   | X                       | Y         | Z         |
| -----  |        |        |                         |           |           |
| 1      | 6      | 0      | 0.908711                | -1.279595 | -0.195349 |
| 2      | 6      | 0      | 0.478551                | -2.616021 | 0.010572  |
| 3      | 6      | 0      | 1.386478                | -3.650609 | 0.256150  |
| 4      | 6      | 0      | 2.732462                | -3.332693 | 0.293928  |
| 5      | 6      | 0      | 3.161768                | -1.998438 | 0.087973  |
| 6      | 6      | 0      | 2.252137                | -0.962704 | -0.157918 |
| 7      | 1      | 0      | 1.041219                | -4.667708 | 0.412222  |
| 8      | 1      | 0      | 2.598668                | 0.054093  | -0.313657 |
| 9      | 6      | 0      | -0.274576               | -0.346610 | -0.442816 |
| 10     | 6      | 0      | -0.197628               | 0.293138  | -1.837683 |
| 11     | 6      | 0      | -0.367031               | 0.739319  | 0.640164  |

|    |    |   |            |           |           |
|----|----|---|------------|-----------|-----------|
| 12 | 6  | 0 | 3.914155   | -4.267584 | 0.542892  |
| 13 | 6  | 0 | 3.832441   | -4.910676 | 1.935877  |
| 14 | 6  | 0 | 4.008156   | -5.351219 | -0.542230 |
| 15 | 6  | 0 | -0.959367  | -2.599768 | -0.089256 |
| 16 | 6  | 0 | -1.424574  | -1.324726 | -0.345420 |
| 17 | 6  | 0 | -2.817982  | -1.265819 | -0.463664 |
| 18 | 6  | 0 | -3.424966  | -2.506249 | -0.292498 |
| 19 | 16 | 0 | -2.223742  | -3.752754 | 0.016668  |
| 20 | 1  | 0 | -3.386134  | -0.370259 | -0.683733 |
| 21 | 6  | 0 | 4.598460   | -2.003875 | 0.189079  |
| 22 | 6  | 0 | 5.063418   | -3.287773 | 0.449611  |
| 23 | 6  | 0 | 6.446977   | -3.328905 | 0.553914  |
| 24 | 6  | 0 | 7.054398   | -2.073619 | 0.372709  |
| 25 | 16 | 0 | 5.838485   | -0.832064 | 0.066818  |
| 26 | 1  | 0 | 7.041400   | -4.213196 | 0.753293  |
| 27 | 6  | 0 | -4.837445  | -2.763212 | -0.311868 |
| 28 | 6  | 0 | -5.546963  | -3.967334 | -0.450132 |
| 29 | 16 | 0 | -5.909448  | -1.403484 | -0.155117 |
| 30 | 6  | 0 | -6.929041  | -3.751385 | -0.446177 |
| 31 | 6  | 0 | -7.316476  | -2.418329 | -0.303525 |
| 32 | 1  | 0 | -7.668832  | -4.533683 | -0.553917 |
| 33 | 6  | 0 | -8.691948  | -2.080397 | -0.290593 |
| 34 | 6  | 0 | -10.825073 | -0.715570 | -0.188473 |
| 35 | 6  | 0 | -9.375067  | -0.893974 | -0.174853 |
| 36 | 6  | 0 | -8.755501  | 0.434471  | -0.011569 |
| 37 | 6  | 0 | -11.799729 | -1.683369 | -0.321652 |
| 38 | 6  | 0 | -11.527924 | -3.073644 | -0.472951 |
| 39 | 6  | 0 | -13.194288 | -1.392844 | -0.322528 |

|    |   |   |            |           |           |
|----|---|---|------------|-----------|-----------|
| 40 | 8 | 0 | -7.563311  | 0.694227  | 0.046973  |
| 41 | 7 | 0 | -11.338251 | -4.214362 | -0.597943 |
| 42 | 7 | 0 | -14.339774 | -1.194008 | -0.327820 |
| 43 | 6 | 0 | -12.203809 | 2.843488  | 0.180104  |
| 44 | 6 | 0 | -12.277879 | 1.449608  | 0.021848  |
| 45 | 6 | 0 | -11.092156 | 0.731520  | -0.031982 |
| 46 | 6 | 0 | -9.856561  | 1.408529  | 0.072259  |
| 47 | 6 | 0 | -9.748606  | 2.774076  | 0.229000  |
| 48 | 6 | 0 | -10.943024 | 3.489291  | 0.281675  |
| 49 | 1 | 0 | -13.248330 | 0.979201  | -0.052888 |
| 50 | 1 | 0 | -8.773848  | 3.242052  | 0.305081  |
| 51 | 6 | 0 | 8.461018   | -1.951915 | 0.448933  |
| 52 | 6 | 0 | 10.794861  | -0.965340 | 0.429794  |
| 53 | 6 | 0 | 9.340212   | -0.901393 | 0.319254  |
| 54 | 6 | 0 | 8.967213   | 0.496347  | 0.035993  |
| 55 | 6 | 0 | 11.582455  | -2.067426 | 0.695605  |
| 56 | 6 | 0 | 11.072938  | -3.379584 | 0.914445  |
| 57 | 6 | 0 | 13.003126  | -2.010043 | 0.782021  |
| 58 | 8 | 0 | 7.843813   | 0.949784  | -0.120029 |
| 59 | 7 | 0 | 10.690435  | -4.462700 | 1.097480  |
| 60 | 7 | 0 | 14.163186  | -2.002739 | 0.860200  |
| 61 | 6 | 0 | 12.781093  | 2.279095  | -0.061133 |
| 62 | 6 | 0 | 12.607224  | 0.907568  | 0.188450  |
| 63 | 6 | 0 | 11.315285  | 0.402300  | 0.204080  |
| 64 | 6 | 0 | 10.222025  | 1.265660  | -0.027840 |
| 65 | 6 | 0 | 10.357162  | 2.615105  | -0.274778 |
| 66 | 6 | 0 | 11.657082  | 3.116177  | -0.289323 |
| 67 | 1 | 0 | 13.477314  | 0.289217  | 0.359425  |

|    |    |   |            |           |           |
|----|----|---|------------|-----------|-----------|
| 68 | 1  | 0 | 9.482049   | 3.231324  | -0.446056 |
| 69 | 1  | 0 | 8.908642   | -2.917834 | 0.653874  |
| 70 | 1  | 0 | -9.301092  | -2.970641 | -0.396713 |
| 71 | 1  | 0 | 2.954341   | -5.557672 | 2.009995  |
| 72 | 1  | 0 | 4.717862   | -5.523002 | 2.125847  |
| 73 | 1  | 0 | 3.765970   | -4.150616 | 2.716921  |
| 74 | 1  | 0 | 4.065010   | -4.907216 | -1.538120 |
| 75 | 1  | 0 | 4.897861   | -5.967560 | -0.388990 |
| 76 | 1  | 0 | 3.134847   | -6.008020 | -0.507760 |
| 77 | 1  | 0 | -1.085311  | 0.902383  | -2.027559 |
| 78 | 1  | 0 | 0.678306   | 0.942566  | -1.915193 |
| 79 | 1  | 0 | -0.130540  | -0.468951 | -2.616669 |
| 80 | 1  | 0 | -1.259149  | 1.352878  | 0.489387  |
| 81 | 1  | 0 | -0.418911  | 0.297132  | 1.637098  |
| 82 | 1  | 0 | 0.504370   | 1.398297  | 0.600794  |
| 83 | 16 | 0 | -4.766961  | -5.534289 | -0.647802 |
| 84 | 6  | 0 | -6.180840  | -6.659995 | -0.677146 |
| 85 | 1  | 0 | -6.822282  | -6.479373 | -1.540942 |
| 86 | 1  | 0 | -5.752589  | -7.659063 | -0.763179 |
| 87 | 1  | 0 | -6.756590  | -6.603107 | 0.247551  |
| 88 | 6  | 0 | -13.291885 | 3.772292  | 0.258963  |
| 89 | 6  | 0 | -12.858042 | 5.047299  | 0.412013  |
| 90 | 16 | 0 | -11.124596 | 5.209133  | 0.470707  |
| 91 | 1  | 0 | -14.336217 | 3.497090  | 0.203305  |
| 92 | 6  | 0 | 13.814039  | 4.320506  | -0.385201 |
| 93 | 6  | 0 | 14.014526  | 3.005967  | -0.123187 |
| 94 | 16 | 0 | 12.139899  | 4.763706  | -0.572183 |
| 95 | 1  | 0 | 14.991603  | 2.565577  | 0.020664  |

|    |    |   |            |          |           |
|----|----|---|------------|----------|-----------|
| 96 | 35 | 0 | 15.120909  | 5.635920 | -0.555304 |
| 97 | 35 | 0 | -13.912650 | 6.574137 | 0.556793  |

### Atomic coordinates of Designed Molecule IDST6

---

| Center<br>Number | Atomic<br>Number | Atomic<br>Type | Coordinates (Angstroms) |           |           |
|------------------|------------------|----------------|-------------------------|-----------|-----------|
|                  |                  |                | X                       | Y         | Z         |
| 1                | 6                | 0              | 0.950959                | -0.819808 | -0.204609 |
| 2                | 6                | 0              | 0.518701                | -2.155443 | 0.003138  |
| 3                | 6                | 0              | 1.425442                | -3.192458 | 0.243276  |
| 4                | 6                | 0              | 2.772381                | -2.877841 | 0.273798  |
| 5                | 6                | 0              | 3.203552                | -1.544378 | 0.066053  |
| 6                | 6                | 0              | 2.295173                | -0.506208 | -0.174448 |
| 7                | 1                | 0              | 1.078522                | -4.208747 | 0.400822  |
| 8                | 1                | 0              | 2.643410                | 0.509761  | -0.331674 |
| 9                | 6                | 0              | -0.231141               | 0.116261  | -0.445271 |
| 10               | 6                | 0              | -0.160484               | 0.755678  | -1.840661 |
| 11               | 6                | 0              | -0.314695               | 1.202507  | 0.638145  |
| 12               | 6                | 0              | 3.953372                | -3.815479 | 0.515943  |
| 13               | 6                | 0              | 3.878059                | -4.458487 | 1.909356  |
| 14               | 6                | 0              | 4.038945                | -4.899216 | -0.569805 |
| 15               | 6                | 0              | -0.919642               | -2.135535 | -0.088544 |
| 16               | 6                | 0              | -1.382940               | -0.858868 | -0.341319 |
| 17               | 6                | 0              | -2.776590               | -0.795987 | -0.450834 |
| 18               | 6                | 0              | -3.386058               | -2.034998 | -0.276600 |
| 19               | 16               | 0              | -2.186454               | -3.285146 | 0.024197  |
| 20               | 1                | 0              | -3.343599               | 0.101235  | -0.666998 |
| 21               | 6                | 0              | 4.640406                | -1.552679 | 0.158959  |

|    |    |   |            |           |           |
|----|----|---|------------|-----------|-----------|
| 22 | 6  | 0 | 5.104317   | -2.838173 | 0.416331  |
| 23 | 6  | 0 | 6.487868   | -2.881937 | 0.512084  |
| 24 | 6  | 0 | 7.096944   | -1.627092 | 0.327557  |
| 25 | 16 | 0 | 5.881111   | -0.382815 | 0.029976  |
| 26 | 1  | 0 | 7.082071   | -3.767333 | 0.707142  |
| 27 | 6  | 0 | -4.799244  | -2.286805 | -0.286819 |
| 28 | 6  | 0 | -5.514012  | -3.488696 | -0.423642 |
| 29 | 16 | 0 | -5.864726  | -0.923657 | -0.118771 |
| 30 | 6  | 0 | -6.894694  | -3.267815 | -0.410195 |
| 31 | 6  | 0 | -7.276651  | -1.933159 | -0.261156 |
| 32 | 1  | 0 | -7.638145  | -4.046968 | -0.515632 |
| 33 | 6  | 0 | -8.649954  | -1.590945 | -0.238346 |
| 34 | 6  | 0 | -10.778336 | -0.220552 | -0.117384 |
| 35 | 6  | 0 | -9.328704  | -0.401499 | -0.113614 |
| 36 | 6  | 0 | -8.700258  | 0.922526  | 0.051954  |
| 37 | 6  | 0 | -11.757138 | -1.185201 | -0.250937 |
| 38 | 6  | 0 | -11.490548 | -2.574815 | -0.413030 |
| 39 | 6  | 0 | -13.149711 | -0.887138 | -0.241121 |
| 40 | 8  | 0 | -7.505688  | 1.173018  | 0.102858  |
| 41 | 7  | 0 | -11.302486 | -3.714938 | -0.546599 |
| 42 | 7  | 0 | -14.293586 | -0.678822 | -0.237442 |
| 43 | 6  | 0 | -12.148208 | 3.357576  | 0.284450  |
| 44 | 6  | 0 | -12.208634 | 1.950532  | 0.116813  |
| 45 | 6  | 0 | -11.039935 | 1.225095  | 0.049316  |
| 46 | 6  | 0 | -9.795932  | 1.902661  | 0.149331  |
| 47 | 6  | 0 | -9.697829  | 3.255375  | 0.311802  |
| 48 | 6  | 0 | -10.883738 | 4.024378  | 0.383696  |
| 49 | 1  | 0 | -13.182829 | 1.486181  | 0.046672  |

|    |   |   |           |           |           |
|----|---|---|-----------|-----------|-----------|
| 50 | 1 | 0 | -8.722978 | 3.725911  | 0.384278  |
| 51 | 6 | 0 | 8.503433  | -1.508914 | 0.393447  |
| 52 | 6 | 0 | 10.839917 | -0.529371 | 0.354758  |
| 53 | 6 | 0 | 9.384712  | -0.459346 | 0.257067  |
| 54 | 6 | 0 | 9.009029  | 0.938640  | -0.021579 |
| 55 | 6 | 0 | 11.626908 | -1.634391 | 0.613953  |
| 56 | 6 | 0 | 11.115542 | -2.944474 | 0.838093  |
| 57 | 6 | 0 | 13.048033 | -1.577813 | 0.686562  |
| 58 | 8 | 0 | 7.883295  | 1.390333  | -0.165729 |
| 59 | 7 | 0 | 10.728832 | -4.025573 | 1.024840  |
| 60 | 7 | 0 | 14.208880 | -1.567898 | 0.752797  |
| 61 | 6 | 0 | 12.838382 | 2.724953  | -0.160815 |
| 62 | 6 | 0 | 12.641739 | 1.343199  | 0.092179  |
| 63 | 6 | 0 | 11.361921 | 0.835465  | 0.123921  |
| 64 | 6 | 0 | 10.264093 | 1.707808  | -0.097844 |
| 65 | 6 | 0 | 10.413351 | 3.043078  | -0.342554 |
| 66 | 6 | 0 | 11.717891 | 3.590480  | -0.380669 |
| 67 | 1 | 0 | 13.514043 | 0.724570  | 0.253374  |
| 68 | 1 | 0 | 9.541157  | 3.667430  | -0.505401 |
| 69 | 1 | 0 | 8.950643  | -2.475905 | 0.594362  |
| 70 | 1 | 0 | -9.263044 | -2.478610 | -0.343645 |
| 71 | 1 | 0 | 2.998838  | -5.103353 | 1.988338  |
| 72 | 1 | 0 | 4.763032  | -5.072983 | 2.094207  |
| 73 | 1 | 0 | 3.817855  | -3.698414 | 2.690892  |
| 74 | 1 | 0 | 4.091084  | -4.455379 | -1.566028 |
| 75 | 1 | 0 | 4.928187  | -5.517429 | -0.421609 |
| 76 | 1 | 0 | 3.164504  | -5.554213 | -0.530387 |
| 77 | 1 | 0 | -1.047547 | 1.367350  | -2.025491 |



|     |    |   |            |           |           |
|-----|----|---|------------|-----------|-----------|
| 78  | 1  | 0 | 0.716769   | 1.402675  | -1.923222 |
| 79  | 1  | 0 | -0.099949  | -0.006608 | -2.619987 |
| 80  | 1  | 0 | -1.206154  | 1.818230  | 0.492411  |
| 81  | 1  | 0 | -0.361915  | 0.760632  | 1.635449  |
| 82  | 1  | 0 | 0.558042   | 1.859378  | 0.593681  |
| 83  | 16 | 0 | -4.740037  | -5.057093 | -0.630750 |
| 84  | 6  | 0 | -6.157621  | -6.178158 | -0.657839 |
| 85  | 1  | 0 | -6.802953  | -5.991225 | -1.517374 |
| 86  | 1  | 0 | -5.733060  | -7.178161 | -0.750899 |
| 87  | 1  | 0 | -6.728199  | -6.123798 | 0.270202  |
| 88  | 6  | 0 | 11.941508  | 4.965238  | -0.630945 |
| 89  | 6  | 0 | 13.217026  | 5.452426  | -0.661610 |
| 90  | 6  | 0 | 14.323590  | 4.600943  | -0.445613 |
| 91  | 6  | 0 | 14.146129  | 3.269447  | -0.200479 |
| 92  | 6  | 0 | -13.337740 | 4.124255  | 0.355960  |
| 93  | 6  | 0 | -13.267699 | 5.478313  | 0.517474  |
| 94  | 6  | 0 | -12.019764 | 6.133635  | 0.615278  |
| 95  | 6  | 0 | -10.851361 | 5.429317  | 0.550895  |
| 96  | 1  | 0 | -14.308075 | 3.647334  | 0.283523  |
| 97  | 1  | 0 | -9.908029  | 5.956560  | 0.629080  |
| 98  | 1  | 0 | 11.110674  | 5.639843  | -0.799949 |
| 99  | 1  | 0 | 15.012390  | 2.639045  | -0.037886 |
| 100 | 9  | 0 | 13.458731  | 6.740572  | -0.894827 |
| 101 | 9  | 0 | 15.539956  | 5.140199  | -0.488899 |
| 102 | 9  | 0 | -14.367750 | 6.223931  | 0.587963  |
| 103 | 9  | 0 | -12.021578 | 7.455248  | 0.771902  |

**Atomic coordinates of Designed Molecule IDST7**

-----

| Center<br>Number | Atomic<br>Number | Atomic<br>Type | Coordinates (Angstroms) |           |           |
|------------------|------------------|----------------|-------------------------|-----------|-----------|
|                  |                  |                | X                       | Y         | Z         |
| 1                | 6                | 0              | -1.015403               | -0.162185 | 0.244535  |
| 2                | 6                | 0              | -0.576426               | -1.495663 | 0.036788  |
| 3                | 6                | 0              | -1.478164               | -2.541262 | -0.183532 |
| 4                | 6                | 0              | -2.827688               | -2.237377 | -0.194918 |
| 5                | 6                | 0              | -3.266049               | -0.906062 | 0.012269  |
| 6                | 6                | 0              | -2.362431               | 0.140671  | 0.233671  |
| 7                | 1                | 0              | -1.125513               | -3.555513 | -0.341321 |
| 8                | 1                | 0              | -2.716334               | 1.154683  | 0.390691  |
| 9                | 6                | 0              | 0.163509                | 0.783858  | 0.461518  |
| 10               | 6                | 0              | 0.110808                | 1.428918  | 1.855179  |
| 11               | 6                | 0              | 0.221164                | 1.866008  | -0.627791 |
| 12               | 6                | 0              | -4.004136               | -3.185701 | -0.415147 |
| 13               | 6                | 0              | -3.942923               | -3.836384 | -1.805688 |
| 14               | 6                | 0              | -4.066101               | -4.263604 | 0.678121  |
| 15               | 6                | 0              | 0.862662                | -1.464626 | 0.104573  |
| 16               | 6                | 0              | 1.320917                | -0.183192 | 0.342906  |
| 17               | 6                | 0              | 2.715776                | -0.110082 | 0.426869  |
| 18               | 6                | 0              | 3.330601                | -1.346056 | 0.247792  |
| 19               | 16               | 0              | 2.134651                | -2.606028 | -0.025121 |
| 20               | 1                | 0              | 3.280102                | 0.792458  | 0.627581  |
| 21               | 6                | 0              | -4.703897               | -0.926163 | -0.060898 |
| 22               | 6                | 0              | -5.161133               | -2.216991 | -0.305385 |
| 23               | 6                | 0              | -6.544950               | -2.272280 | -0.384095 |
| 24               | 6                | 0              | -7.161240               | -1.020743 | -0.200056 |
| 25               | 16               | 0              | -5.952005               | 0.234478  | 0.076524  |

|    |    |   |            |           |           |
|----|----|---|------------|-----------|-----------|
| 26 | 1  | 0 | -7.134196  | -3.163520 | -0.567145 |
| 27 | 6  | 0 | 4.744848   | -1.589752 | 0.233051  |
| 28 | 6  | 0 | 5.467853   | -2.788860 | 0.356469  |
| 29 | 16 | 0 | 5.800692   | -0.222011 | 0.045593  |
| 30 | 6  | 0 | 6.846626   | -2.562084 | 0.315552  |
| 31 | 6  | 0 | 7.219325   | -1.225524 | 0.159033  |
| 32 | 1  | 0 | 7.595332   | -3.338192 | 0.405203  |
| 33 | 6  | 0 | 8.589024   | -0.876349 | 0.104419  |
| 34 | 6  | 0 | 10.716141  | 0.470686  | -0.066716 |
| 35 | 6  | 0 | 9.264108   | 0.313625  | -0.035284 |
| 36 | 6  | 0 | 8.628976   | 1.647051  | -0.179595 |
| 37 | 6  | 0 | 11.708395  | -0.482550 | 0.030820  |
| 38 | 6  | 0 | 11.470397  | -1.875802 | 0.189971  |
| 39 | 6  | 0 | 13.081185  | -0.111410 | -0.024638 |
| 40 | 8  | 0 | 7.434716   | 1.889785  | -0.198278 |
| 41 | 7  | 0 | 11.289452  | -3.017368 | 0.320412  |
| 42 | 7  | 0 | 14.199157  | 0.204263  | -0.071590 |
| 43 | 6  | 0 | -8.568161  | -0.911378 | -0.254362 |
| 44 | 6  | 0 | -10.911747 | 0.023143  | -0.220620 |
| 45 | 6  | 0 | -9.458886  | 0.130886  | -0.123205 |
| 46 | 6  | 0 | -9.094002  | 1.544641  | 0.137690  |
| 47 | 6  | 0 | -11.702523 | -1.083778 | -0.451712 |
| 48 | 6  | 0 | -11.204146 | -2.401444 | -0.647289 |
| 49 | 6  | 0 | -13.119516 | -0.965874 | -0.510196 |
| 50 | 8  | 0 | -7.971704  | 1.998631  | 0.277054  |
| 51 | 7  | 0 | -10.812564 | -3.484746 | -0.809018 |
| 52 | 7  | 0 | -14.276282 | -0.857649 | -0.556021 |
| 53 | 1  | 0 | -9.014083  | -1.882087 | -0.443974 |

|    |    |   |            |           |           |
|----|----|---|------------|-----------|-----------|
| 54 | 1  | 0 | 9.211374   | -1.760200 | 0.194092  |
| 55 | 1  | 0 | -3.059683  | -4.474622 | -1.892940 |
| 56 | 1  | 0 | -4.825281  | -4.459112 | -1.974766 |
| 57 | 1  | 0 | -3.899531  | -3.080596 | -2.592472 |
| 58 | 1  | 0 | -4.107954  | -3.814323 | 1.672388  |
| 59 | 1  | 0 | -4.952259  | -4.889869 | 0.546024  |
| 60 | 1  | 0 | -3.187028  | -4.911795 | 0.630395  |
| 61 | 1  | 0 | 0.995922   | 2.048254  | 2.022751  |
| 62 | 1  | 0 | -0.769932  | 2.069527  | 1.949097  |
| 63 | 1  | 0 | 0.068836   | 0.669784  | 2.638803  |
| 64 | 1  | 0 | 1.110236   | 2.488975  | -0.499486 |
| 65 | 1  | 0 | 0.255094   | 1.420376  | -1.623971 |
| 66 | 1  | 0 | -0.655502  | 2.516659  | -0.571526 |
| 67 | 16 | 0 | 4.705622   | -4.360769 | 0.578905  |
| 68 | 6  | 0 | 6.129334   | -5.474280 | 0.585529  |
| 69 | 1  | 0 | 6.788208   | -5.280727 | 1.433242  |
| 70 | 1  | 0 | 5.711546   | -6.476038 | 0.689646  |
| 71 | 1  | 0 | 6.683568   | -5.420712 | -0.352417 |
| 72 | 6  | 0 | -12.675337 | 1.977413  | 0.013712  |
| 73 | 6  | 0 | -11.448107 | 1.373912  | -0.020939 |
| 74 | 6  | 0 | -10.368073 | 2.281645  | 0.192633  |
| 75 | 6  | 0 | -10.779214 | 3.564151  | 0.387355  |
| 76 | 16 | 0 | -12.512350 | 3.668973  | 0.309210  |
| 77 | 1  | 0 | -13.659322 | 1.551466  | -0.112726 |
| 78 | 17 | 0 | -9.831365  | 4.950484  | 0.674859  |
| 79 | 6  | 0 | 12.070692  | 2.723135  | -0.332212 |
| 80 | 6  | 0 | 10.979869  | 1.903866  | -0.229592 |
| 81 | 6  | 0 | 9.739394   | 2.606580  | -0.296516 |

|    |    |   |           |          |           |
|----|----|---|-----------|----------|-----------|
| 82 | 6  | 0 | 9.895037  | 3.950154 | -0.449295 |
| 83 | 16 | 0 | 11.580941 | 4.366902 | -0.512176 |
| 84 | 1  | 0 | 13.122451 | 2.479677 | -0.315263 |
| 85 | 17 | 0 | 8.692680  | 5.150374 | -0.573693 |

### Input script of IDSTR molecule for Geometry Optimization

#### IDSTR

%nprocshared=22

%mem=22GB

%chk=IDSTR.chk

# opt rmpw1pw91/6-31g(d,p) geom=connectivity

#### IDSTR

0 1

|   |             |             |             |
|---|-------------|-------------|-------------|
| C | -1.01814500 | -0.13715800 | 0.24836500  |
| C | -0.58373000 | -1.46880700 | 0.02121900  |
| C | -1.48920700 | -2.50670500 | -0.21909900 |
| C | -2.83754000 | -2.19687200 | -0.23049000 |
| C | -3.27106200 | -0.86738000 | -0.00349500 |
| C | -2.36388900 | 0.17165000  | 0.23752000  |
| H | -1.14045800 | -3.51990200 | -0.39171800 |
| H | -2.71383800 | 1.18461100  | 0.40960700  |
| C | 0.16357700  | 0.80058000  | 0.48475800  |
| C | 0.10793600  | 1.42361200  | 1.88828600  |
| C | 0.22966100  | 1.89964500  | -0.58691000 |
| C | -4.01750000 | -3.13640100 | -0.46965100 |

|   |             |             |             |
|---|-------------|-------------|-------------|
| C | -3.95489700 | -3.76406900 | -1.87070400 |
| C | -4.08716700 | -4.23212600 | 0.60521100  |
| C | 0.85562400  | -1.44452200 | 0.09523900  |
| C | 1.31756700  | -0.16900900 | 0.35544300  |
| C | 2.71259700  | -0.10259700 | 0.44791200  |
| C | 3.32332500  | -1.33771000 | 0.25342800  |
| S | 2.12442600  | -2.58872000 | -0.04523400 |
| H | 3.27957900  | 0.79403000  | 0.66669400  |
| C | -4.70903800 | -0.88073400 | -0.08102300 |
| C | -5.17089400 | -2.16476500 | -0.34715700 |
| C | -6.55556100 | -2.21301000 | -0.42971800 |
| C | -7.16706200 | -0.96297700 | -0.22661200 |
| S | -5.95339900 | 0.28238500  | 0.07246500  |
| H | -7.14781500 | -3.09890800 | -0.62839000 |
| C | 4.73740400  | -1.58609600 | 0.24120700  |
| C | 5.45696500  | -2.78533700 | 0.37100200  |
| S | 5.79678900  | -0.22164000 | 0.05001400  |
| C | 6.83717000  | -2.56139100 | 0.33439500  |
| C | 7.21315200  | -1.22686600 | 0.17393200  |
| H | 7.58364600  | -3.33883000 | 0.43107500  |
| C | 8.58513200  | -0.87983400 | 0.12610500  |
| C | 10.70503600 | 0.49827200  | -0.04044700 |
| C | 9.25683400  | 0.31027300  | -0.01610600 |
| C | 8.62710700  | 1.63368600  | -0.17656300 |
| C | 11.69300200 | -0.45555400 | 0.07860800  |
| C | 11.43935300 | -1.84681000 | 0.25328000  |
| C | 13.08332200 | -0.14661800 | 0.03966800  |
| O | 7.43519900  | 1.89318200  | -0.20783400 |

|   |              |             |             |
|---|--------------|-------------|-------------|
| N | 11.26295400  | -2.98728000 | 0.39651400  |
| N | 14.22504000  | 0.06994300  | 0.01219300  |
| C | 12.03258800  | 4.05308900  | -0.48247900 |
| C | 12.13802200  | 2.68243800  | -0.31321500 |
| C | 10.95511800  | 1.94617700  | -0.21938700 |
| C | 9.72501900   | 2.61155600  | -0.29849300 |
| C | 9.61717100   | 3.98203700  | -0.46809800 |
| C | 10.79443200  | 4.70110500  | -0.55965000 |
| H | 13.12629100  | 2.24732700  | -0.26211500 |
| H | 8.65309300   | 4.47229100  | -0.52755300 |
| F | 10.78001300  | 6.01990700  | -0.72293500 |
| F | 13.13157100  | 4.79481700  | -0.57718400 |
| C | -8.57486100  | -0.84725200 | -0.27974700 |
| C | -10.91185400 | 0.12852200  | -0.21825300 |
| C | -9.45642200  | 0.19829100  | -0.12833900 |
| C | -9.08832300  | 1.59625500  | 0.15779700  |
| C | -11.70316200 | -0.97136400 | -0.47403200 |
| C | -11.19574300 | -2.28301400 | -0.70265300 |
| C | -13.12513800 | -0.91052400 | -0.53779500 |
| O | -7.96935500  | 2.06054300  | 0.30331500  |
| N | -10.81364900 | -3.36477400 | -0.89298700 |
| N | -14.28603900 | -0.89752300 | -0.59704500 |
| C | -12.88582400 | 3.35802200  | 0.30768900  |
| C | -12.73116300 | 2.00525600  | 0.05331500  |
| C | -11.43176200 | 1.49463000  | 0.01921800  |
| C | -10.35062400 | 2.35674000  | 0.23990200  |
| C | -10.50255200 | 3.70970500  | 0.49375000  |
| C | -11.79306900 | 4.20462200  | 0.52562300  |

|   |              |             |             |
|---|--------------|-------------|-------------|
| H | -13.61890700 | 1.40941200  | -0.10632100 |
| H | -9.64844500  | 4.35463300  | 0.66083400  |
| F | -12.02697100 | 5.49158000  | 0.76287300  |
| F | -14.10436600 | 3.88882700  | 0.34994500  |
| H | -9.02210900  | -1.81313700 | -0.48609900 |
| H | 9.20353300   | -1.76466200 | 0.22475400  |
| H | -3.07364800  | -4.40383800 | -1.96639800 |
| H | -4.83895500  | -4.38083500 | -2.05235900 |
| H | -3.90684100  | -2.99538700 | -2.64461900 |
| H | -4.13025400  | -3.79935400 | 1.60672500  |
| H | -4.97550200  | -4.85233000 | 0.45986700  |
| H | -3.21066300  | -4.88313600 | 0.54938800  |
| H | 0.99449000   | 2.03725200  | 2.06889800  |
| H | -0.77102300  | 2.06560300  | 1.98938500  |
| H | 0.06064800   | 0.65218600  | 2.65949000  |
| H | 1.12056000   | 2.51705300  | -0.44499500 |
| H | 0.26608300   | 1.46971900  | -1.58988000 |
| H | -0.64477900  | 2.55271000  | -0.52401300 |
| S | 4.68952900   | -4.35433800 | 0.59784000  |
| C | 6.11019200   | -5.47165900 | 0.61455200  |
| H | 6.76663100   | -5.27634000 | 1.46376000  |
| H | 5.68935400   | -6.47184200 | 0.72154300  |
| H | 6.66794400   | -5.42387900 | -0.32162400 |

1 2 1.5 6 2.0 9 1.0

2 3 1.5 15 1.5

3 4 2.0 7 1.0

4 5 1.5 12 1.0



5 6 1.5 21 1.5

6 8 1.0

7

8

9 10 1.0 11 1.0 16 1.0

10 81 1.0 82 1.0 83 1.0

11 84 1.0 85 1.0 86 1.0

12 13 1.0 14 1.0 22 1.0

13 75 1.0 76 1.0 77 1.0

14 78 1.0 79 1.0 80 1.0

15 16 2.0 19 1.0

16 17 1.5

17 18 1.5 20 1.0

18 19 1.0 27 1.5

19

20

21 22 1.5 25 1.0

22 23 1.5

23 24 1.5 26 1.0

24 25 1.0 53 1.5

25

26

27 28 1.5 29 1.0

28 30 1.5 87 1.0

29 31 1.0

30 31 1.5 32 1.0

31 33 1.5

32

33 35 2.0 74 1.0

34 35 1.0 37 2.0 45 1.0

35 36 1.0

36 40 2.0 46 1.0

37 38 1.5 39 1.5

38 41 3.0

39 42 3.0

40

41

42

43 44 2.0 48 1.5 52 1.0

44 45 1.5 49 1.0

45 46 1.5

46 47 2.0

47 48 2.0 50 1.0

48 51 1.0

49

50

51

52

53 55 2.0 73 1.0

54 55 1.0 57 2.0 65 1.0

55 56 1.0

56 60 2.0 66 1.0

57 58 1.5 59 1.5

58 61 3.0

59 62 3.0

60

61

62

63 64 2.0 68 1.5 72 1.0

64 65 1.5 69 1.0

65 66 1.5

66 67 2.0

67 68 2.0 70 1.0

68 71 1.0

69

70

71

72

73

74

75

76

77

78

79

80

81

82

83

84

85

86

87 88 1.0

88 89 1.0 90 1.0 91 1.0

89

90

91

**Input script of IDSTR molecule for TD-DFT.**

**IDSTR**

%nprocshared=22

%mem=22GB

# td=(nstates=10) rmpw1pw91/6-31g(d,p) scrf=(iefpcm,solvent=chloroform)

geom=connectivity

**IDSTRes**

0 1

|   |             |             |             |
|---|-------------|-------------|-------------|
| C | -1.01814500 | -0.13715800 | 0.24836500  |
| C | -0.58373000 | -1.46880700 | 0.02121900  |
| C | -1.48920700 | -2.50670500 | -0.21909900 |
| C | -2.83754000 | -2.19687200 | -0.23049000 |
| C | -3.27106200 | -0.86738000 | -0.00349500 |
| C | -2.36388900 | 0.17165000  | 0.23752000  |
| H | -1.14045800 | -3.51990200 | -0.39171800 |
| H | -2.71383800 | 1.18461100  | 0.40960700  |
| C | 0.16357700  | 0.80058000  | 0.48475800  |
| C | 0.10793600  | 1.42361200  | 1.88828600  |
| C | 0.22966100  | 1.89964500  | -0.58691000 |
| C | -4.01750000 | -3.13640100 | -0.46965100 |
| C | -3.95489700 | -3.76406900 | -1.87070400 |
| C | -4.08716700 | -4.23212600 | 0.60521100  |
| C | 0.85562400  | -1.44452200 | 0.09523900  |

|   |             |             |             |
|---|-------------|-------------|-------------|
| C | 1.31756700  | -0.16900900 | 0.35544300  |
| C | 2.71259700  | -0.10259700 | 0.44791200  |
| C | 3.32332500  | -1.33771000 | 0.25342800  |
| S | 2.12442600  | -2.58872000 | -0.04523400 |
| H | 3.27957900  | 0.79403000  | 0.66669400  |
| C | -4.70903800 | -0.88073400 | -0.08102300 |
| C | -5.17089400 | -2.16476500 | -0.34715700 |
| C | -6.55556100 | -2.21301000 | -0.42971800 |
| C | -7.16706200 | -0.96297700 | -0.22661200 |
| S | -5.95339900 | 0.28238500  | 0.07246500  |
| H | -7.14781500 | -3.09890800 | -0.62839000 |
| C | 4.73740400  | -1.58609600 | 0.24120700  |
| C | 5.45696500  | -2.78533700 | 0.37100200  |
| S | 5.79678900  | -0.22164000 | 0.05001400  |
| C | 6.83717000  | -2.56139100 | 0.33439500  |
| C | 7.21315200  | -1.22686600 | 0.17393200  |
| H | 7.58364600  | -3.33883000 | 0.43107500  |
| C | 8.58513200  | -0.87983400 | 0.12610500  |
| C | 10.70503600 | 0.49827200  | -0.04044700 |
| C | 9.25683400  | 0.31027300  | -0.01610600 |
| C | 8.62710700  | 1.63368600  | -0.17656300 |
| C | 11.69300200 | -0.45555400 | 0.07860800  |
| C | 11.43935300 | -1.84681000 | 0.25328000  |
| C | 13.08332200 | -0.14661800 | 0.03966800  |
| O | 7.43519900  | 1.89318200  | -0.20783400 |
| N | 11.26295400 | -2.98728000 | 0.39651400  |
| N | 14.22504000 | 0.06994300  | 0.01219300  |
| C | 12.03258800 | 4.05308900  | -0.48247900 |

|   |              |             |             |
|---|--------------|-------------|-------------|
| C | 12.13802200  | 2.68243800  | -0.31321500 |
| C | 10.95511800  | 1.94617700  | -0.21938700 |
| C | 9.72501900   | 2.61155600  | -0.29849300 |
| C | 9.61717100   | 3.98203700  | -0.46809800 |
| C | 10.79443200  | 4.70110500  | -0.55965000 |
| H | 13.12629100  | 2.24732700  | -0.26211500 |
| H | 8.65309300   | 4.47229100  | -0.52755300 |
| F | 10.78001300  | 6.01990700  | -0.72293500 |
| F | 13.13157100  | 4.79481700  | -0.57718400 |
| C | -8.57486100  | -0.84725200 | -0.27974700 |
| C | -10.91185400 | 0.12852200  | -0.21825300 |
| C | -9.45642200  | 0.19829100  | -0.12833900 |
| C | -9.08832300  | 1.59625500  | 0.15779700  |
| C | -11.70316200 | -0.97136400 | -0.47403200 |
| C | -11.19574300 | -2.28301400 | -0.70265300 |
| C | -13.12513800 | -0.91052400 | -0.53779500 |
| O | -7.96935500  | 2.06054300  | 0.30331500  |
| N | -10.81364900 | -3.36477400 | -0.89298700 |
| N | -14.28603900 | -0.89752300 | -0.59704500 |
| C | -12.88582400 | 3.35802200  | 0.30768900  |
| C | -12.73116300 | 2.00525600  | 0.05331500  |
| C | -11.43176200 | 1.49463000  | 0.01921800  |
| C | -10.35062400 | 2.35674000  | 0.23990200  |
| C | -10.50255200 | 3.70970500  | 0.49375000  |
| C | -11.79306900 | 4.20462200  | 0.52562300  |
| H | -13.61890700 | 1.40941200  | -0.10632100 |
| H | -9.64844500  | 4.35463300  | 0.66083400  |
| F | -12.02697100 | 5.49158000  | 0.76287300  |

|   |              |             |             |
|---|--------------|-------------|-------------|
| F | -14.10436600 | 3.88882700  | 0.34994500  |
| H | -9.02210900  | -1.81313700 | -0.48609900 |
| H | 9.20353300   | -1.76466200 | 0.22475400  |
| H | -3.07364800  | -4.40383800 | -1.96639800 |
| H | -4.83895500  | -4.38083500 | -2.05235900 |
| H | -3.90684100  | -2.99538700 | -2.64461900 |
| H | -4.13025400  | -3.79935400 | 1.60672500  |
| H | -4.97550200  | -4.85233000 | 0.45986700  |
| H | -3.21066300  | -4.88313600 | 0.54938800  |
| H | 0.99449000   | 2.03725200  | 2.06889800  |
| H | -0.77102300  | 2.06560300  | 1.98938500  |
| H | 0.06064800   | 0.65218600  | 2.65949000  |
| H | 1.12056000   | 2.51705300  | -0.44499500 |
| H | 0.26608300   | 1.46971900  | -1.58988000 |
| H | -0.64477900  | 2.55271000  | -0.52401300 |
| S | 4.68952900   | -4.35433800 | 0.59784000  |
| C | 6.11019200   | -5.47165900 | 0.61455200  |
| H | 6.76663100   | -5.27634000 | 1.46376000  |
| H | 5.68935400   | -6.47184200 | 0.72154300  |
| H | 6.66794400   | -5.42387900 | -0.32162400 |

1 2 1.5 6 2.0 9 1.0

2 3 1.5 15 1.5

3 4 2.0 7 1.0

4 5 1.5 12 1.0

5 6 1.5 21 1.5

6 8 1.0

7

8

9 10 1.0 11 1.0 16 1.0

10 81 1.0 82 1.0 83 1.0

11 84 1.0 85 1.0 86 1.0

12 13 1.0 14 1.0 22 1.0

13 75 1.0 76 1.0 77 1.0

14 78 1.0 79 1.0 80 1.0

15 16 2.0 19 1.0

16 17 1.5

17 18 1.5 20 1.0

18 19 1.0 27 1.5

19

20

21 22 1.5 25 1.0

22 23 1.5

23 24 1.5 26 1.0

24 25 1.0 53 1.5

25

26

27 28 1.5 29 1.0

28 30 1.5 87 1.0

29 31 1.0

30 31 1.5 32 1.0

31 33 1.5

32

33 35 2.0 74 1.0

34 35 1.0 37 2.0 45 1.0

35 36 1.0



36 40 2.0 46 1.0

37 38 1.5 39 1.5

38 41 3.0

39 42 3.0

40

41

42

43 44 2.0 48 1.5 52 1.0

44 45 1.5 49 1.0

45 46 1.5

46 47 2.0

47 48 2.0 50 1.0

48 51 1.0

49

50

51

52

53 55 2.0 73 1.0

54 55 1.0 57 2.0 65 1.0

55 56 1.0

56 60 2.0 66 1.0

57 58 1.5 59 1.5

58 61 3.0

59 62 3.0

60

61

62

63 64 2.0 68 1.5 72 1.0

64 65 1.5 69 1.0

65 66 1.5

66 67 2.0

67 68 2.0 70 1.0

68 71 1.0

69

70

71

72

73

74

75

76

77

78

79

80

81

82

83

84

85

86

87 88 1.0

88 89 1.0 90 1.0 91 1.0

89

90

91

## Input Script of IDSTR molecule for Transition Density Matrix (TDM).

### IDSTR

%chk=IDSTRtdm.chk

%nprocshared=11

%mem=11GB

# td=(nstates=10) rmpw1pw91/6-31g(d,p) density=transition=1

geom=connectivity iop(6/8=3)

IDSTRtdm

0 1

|   |             |             |             |
|---|-------------|-------------|-------------|
| C | -1.01814500 | -0.13715800 | 0.24836500  |
| C | -0.58373000 | -1.46880700 | 0.02121900  |
| C | -1.48920700 | -2.50670500 | -0.21909900 |
| C | -2.83754000 | -2.19687200 | -0.23049000 |
| C | -3.27106200 | -0.86738000 | -0.00349500 |
| C | -2.36388900 | 0.17165000  | 0.23752000  |
| H | -1.14045800 | -3.51990200 | -0.39171800 |
| H | -2.71383800 | 1.18461100  | 0.40960700  |
| C | 0.16357700  | 0.80058000  | 0.48475800  |
| C | 0.10793600  | 1.42361200  | 1.88828600  |
| C | 0.22966100  | 1.89964500  | -0.58691000 |
| C | -4.01750000 | -3.13640100 | -0.46965100 |
| C | -3.95489700 | -3.76406900 | -1.87070400 |
| C | -4.08716700 | -4.23212600 | 0.60521100  |
| C | 0.85562400  | -1.44452200 | 0.09523900  |
| C | 1.31756700  | -0.16900900 | 0.35544300  |
| C | 2.71259700  | -0.10259700 | 0.44791200  |

|   |             |             |             |
|---|-------------|-------------|-------------|
| C | 3.32332500  | -1.33771000 | 0.25342800  |
| S | 2.12442600  | -2.58872000 | -0.04523400 |
| H | 3.27957900  | 0.79403000  | 0.66669400  |
| C | -4.70903800 | -0.88073400 | -0.08102300 |
| C | -5.17089400 | -2.16476500 | -0.34715700 |
| C | -6.55556100 | -2.21301000 | -0.42971800 |
| C | -7.16706200 | -0.96297700 | -0.22661200 |
| S | -5.95339900 | 0.28238500  | 0.07246500  |
| H | -7.14781500 | -3.09890800 | -0.62839000 |
| C | 4.73740400  | -1.58609600 | 0.24120700  |
| C | 5.45696500  | -2.78533700 | 0.37100200  |
| S | 5.79678900  | -0.22164000 | 0.05001400  |
| C | 6.83717000  | -2.56139100 | 0.33439500  |
| C | 7.21315200  | -1.22686600 | 0.17393200  |
| H | 7.58364600  | -3.33883000 | 0.43107500  |
| C | 8.58513200  | -0.87983400 | 0.12610500  |
| C | 10.70503600 | 0.49827200  | -0.04044700 |
| C | 9.25683400  | 0.31027300  | -0.01610600 |
| C | 8.62710700  | 1.63368600  | -0.17656300 |
| C | 11.69300200 | -0.45555400 | 0.07860800  |
| C | 11.43935300 | -1.84681000 | 0.25328000  |
| C | 13.08332200 | -0.14661800 | 0.03966800  |
| O | 7.43519900  | 1.89318200  | -0.20783400 |
| N | 11.26295400 | -2.98728000 | 0.39651400  |
| N | 14.22504000 | 0.06994300  | 0.01219300  |
| C | 12.03258800 | 4.05308900  | -0.48247900 |
| C | 12.13802200 | 2.68243800  | -0.31321500 |
| C | 10.95511800 | 1.94617700  | -0.21938700 |

|   |              |             |             |
|---|--------------|-------------|-------------|
| C | 9.72501900   | 2.61155600  | -0.29849300 |
| C | 9.61717100   | 3.98203700  | -0.46809800 |
| C | 10.79443200  | 4.70110500  | -0.55965000 |
| H | 13.12629100  | 2.24732700  | -0.26211500 |
| H | 8.65309300   | 4.47229100  | -0.52755300 |
| F | 10.78001300  | 6.01990700  | -0.72293500 |
| F | 13.13157100  | 4.79481700  | -0.57718400 |
| C | -8.57486100  | -0.84725200 | -0.27974700 |
| C | -10.91185400 | 0.12852200  | -0.21825300 |
| C | -9.45642200  | 0.19829100  | -0.12833900 |
| C | -9.08832300  | 1.59625500  | 0.15779700  |
| C | -11.70316200 | -0.97136400 | -0.47403200 |
| C | -11.19574300 | -2.28301400 | -0.70265300 |
| C | -13.12513800 | -0.91052400 | -0.53779500 |
| O | -7.96935500  | 2.06054300  | 0.30331500  |
| N | -10.81364900 | -3.36477400 | -0.89298700 |
| N | -14.28603900 | -0.89752300 | -0.59704500 |
| C | -12.88582400 | 3.35802200  | 0.30768900  |
| C | -12.73116300 | 2.00525600  | 0.05331500  |
| C | -11.43176200 | 1.49463000  | 0.01921800  |
| C | -10.35062400 | 2.35674000  | 0.23990200  |
| C | -10.50255200 | 3.70970500  | 0.49375000  |
| C | -11.79306900 | 4.20462200  | 0.52562300  |
| H | -13.61890700 | 1.40941200  | -0.10632100 |
| H | -9.64844500  | 4.35463300  | 0.66083400  |
| F | -12.02697100 | 5.49158000  | 0.76287300  |
| F | -14.10436600 | 3.88882700  | 0.34994500  |
| H | -9.02210900  | -1.81313700 | -0.48609900 |

|   |             |             |             |
|---|-------------|-------------|-------------|
| H | 9.20353300  | -1.76466200 | 0.22475400  |
| H | -3.07364800 | -4.40383800 | -1.96639800 |
| H | -4.83895500 | -4.38083500 | -2.05235900 |
| H | -3.90684100 | -2.99538700 | -2.64461900 |
| H | -4.13025400 | -3.79935400 | 1.60672500  |
| H | -4.97550200 | -4.85233000 | 0.45986700  |
| H | -3.21066300 | -4.88313600 | 0.54938800  |
| H | 0.99449000  | 2.03725200  | 2.06889800  |
| H | -0.77102300 | 2.06560300  | 1.98938500  |
| H | 0.06064800  | 0.65218600  | 2.65949000  |
| H | 1.12056000  | 2.51705300  | -0.44499500 |
| H | 0.26608300  | 1.46971900  | -1.58988000 |
| H | -0.64477900 | 2.55271000  | -0.52401300 |
| S | 4.68952900  | -4.35433800 | 0.59784000  |
| C | 6.11019200  | -5.47165900 | 0.61455200  |
| H | 6.76663100  | -5.27634000 | 1.46376000  |
| H | 5.68935400  | -6.47184200 | 0.72154300  |
| H | 6.66794400  | -5.42387900 | -0.32162400 |

1 2 1.5 6 2.0 9 1.0

2 3 1.5 15 1.5

3 4 2.0 7 1.0

4 5 1.5 12 1.0

5 6 1.5 21 1.5

6 8 1.0

7

8

9 10 1.0 11 1.0 16 1.0

10 81 1.0 82 1.0 83 1.0

11 84 1.0 85 1.0 86 1.0

12 13 1.0 14 1.0 22 1.0

13 75 1.0 76 1.0 77 1.0

14 78 1.0 79 1.0 80 1.0

15 16 2.0 19 1.0

16 17 1.5

17 18 1.5 20 1.0

18 19 1.0 27 1.5

19

20

21 22 1.5 25 1.0

22 23 1.5

23 24 1.5 26 1.0

24 25 1.0 53 1.5

25

26

27 28 1.5 29 1.0

28 30 1.5 87 1.0

29 31 1.0

30 31 1.5 32 1.0

31 33 1.5

32

33 35 2.0 74 1.0

34 35 1.0 37 2.0 45 1.0

35 36 1.0

36 40 2.0 46 1.0

37 38 1.5 39 1.5

38 41 3.0  
39 42 3.0  
40  
41  
42  
43 44 2.0 48 1.5 52 1.0  
44 45 1.5 49 1.0  
45 46 1.5  
46 47 2.0  
47 48 2.0 50 1.0  
48 51 1.0  
49  
50  
51  
52  
53 55 2.0 73 1.0  
54 55 1.0 57 2.0 65 1.0  
55 56 1.0  
56 60 2.0 66 1.0  
57 58 1.5 59 1.5  
58 61 3.0  
59 62 3.0  
60  
61  
62  
63 64 2.0 68 1.5 72 1.0  
64 65 1.5 69 1.0  
65 66 1.5



66 67 2.0

67 68 2.0 70 1.0

68 71 1.0

69

70

71

72

73

74

75

76

77

78

79

80

81

82

83

84

85

86

87 88 1.0

88 89 1.0 90 1.0 91 1.0

89

90

91

**Input Script of Density of states (DOS) for IDSTR**

**IDSTR**

%nprocshared=22

%mem=22GB

# rmpw1pw91/6-31g(d,p) pop=full geom=connectivity iop(3/33=1,3/36=-1)

IDSTRdos

0 1

|   |             |             |             |
|---|-------------|-------------|-------------|
| C | -1.01814500 | -0.13715800 | 0.24836500  |
| C | -0.58373000 | -1.46880700 | 0.02121900  |
| C | -1.48920700 | -2.50670500 | -0.21909900 |
| C | -2.83754000 | -2.19687200 | -0.23049000 |
| C | -3.27106200 | -0.86738000 | -0.00349500 |
| C | -2.36388900 | 0.17165000  | 0.23752000  |
| H | -1.14045800 | -3.51990200 | -0.39171800 |
| H | -2.71383800 | 1.18461100  | 0.40960700  |
| C | 0.16357700  | 0.80058000  | 0.48475800  |
| C | 0.10793600  | 1.42361200  | 1.88828600  |
| C | 0.22966100  | 1.89964500  | -0.58691000 |
| C | -4.01750000 | -3.13640100 | -0.46965100 |
| C | -3.95489700 | -3.76406900 | -1.87070400 |
| C | -4.08716700 | -4.23212600 | 0.60521100  |
| C | 0.85562400  | -1.44452200 | 0.09523900  |
| C | 1.31756700  | -0.16900900 | 0.35544300  |
| C | 2.71259700  | -0.10259700 | 0.44791200  |
| C | 3.32332500  | -1.33771000 | 0.25342800  |
| S | 2.12442600  | -2.58872000 | -0.04523400 |
| H | 3.27957900  | 0.79403000  | 0.66669400  |
| C | -4.70903800 | -0.88073400 | -0.08102300 |

|   |             |             |             |
|---|-------------|-------------|-------------|
| C | -5.17089400 | -2.16476500 | -0.34715700 |
| C | -6.55556100 | -2.21301000 | -0.42971800 |
| C | -7.16706200 | -0.96297700 | -0.22661200 |
| S | -5.95339900 | 0.28238500  | 0.07246500  |
| H | -7.14781500 | -3.09890800 | -0.62839000 |
| C | 4.73740400  | -1.58609600 | 0.24120700  |
| C | 5.45696500  | -2.78533700 | 0.37100200  |
| S | 5.79678900  | -0.22164000 | 0.05001400  |
| C | 6.83717000  | -2.56139100 | 0.33439500  |
| C | 7.21315200  | -1.22686600 | 0.17393200  |
| H | 7.58364600  | -3.33883000 | 0.43107500  |
| C | 8.58513200  | -0.87983400 | 0.12610500  |
| C | 10.70503600 | 0.49827200  | -0.04044700 |
| C | 9.25683400  | 0.31027300  | -0.01610600 |
| C | 8.62710700  | 1.63368600  | -0.17656300 |
| C | 11.69300200 | -0.45555400 | 0.07860800  |
| C | 11.43935300 | -1.84681000 | 0.25328000  |
| C | 13.08332200 | -0.14661800 | 0.03966800  |
| O | 7.43519900  | 1.89318200  | -0.20783400 |
| N | 11.26295400 | -2.98728000 | 0.39651400  |
| N | 14.22504000 | 0.06994300  | 0.01219300  |
| C | 12.03258800 | 4.05308900  | -0.48247900 |
| C | 12.13802200 | 2.68243800  | -0.31321500 |
| C | 10.95511800 | 1.94617700  | -0.21938700 |
| C | 9.72501900  | 2.61155600  | -0.29849300 |
| C | 9.61717100  | 3.98203700  | -0.46809800 |
| C | 10.79443200 | 4.70110500  | -0.55965000 |
| H | 13.12629100 | 2.24732700  | -0.26211500 |

|   |              |             |             |
|---|--------------|-------------|-------------|
| H | 8.65309300   | 4.47229100  | -0.52755300 |
| F | 10.78001300  | 6.01990700  | -0.72293500 |
| F | 13.13157100  | 4.79481700  | -0.57718400 |
| C | -8.57486100  | -0.84725200 | -0.27974700 |
| C | -10.91185400 | 0.12852200  | -0.21825300 |
| C | -9.45642200  | 0.19829100  | -0.12833900 |
| C | -9.08832300  | 1.59625500  | 0.15779700  |
| C | -11.70316200 | -0.97136400 | -0.47403200 |
| C | -11.19574300 | -2.28301400 | -0.70265300 |
| C | -13.12513800 | -0.91052400 | -0.53779500 |
| O | -7.96935500  | 2.06054300  | 0.30331500  |
| N | -10.81364900 | -3.36477400 | -0.89298700 |
| N | -14.28603900 | -0.89752300 | -0.59704500 |
| C | -12.88582400 | 3.35802200  | 0.30768900  |
| C | -12.73116300 | 2.00525600  | 0.05331500  |
| C | -11.43176200 | 1.49463000  | 0.01921800  |
| C | -10.35062400 | 2.35674000  | 0.23990200  |
| C | -10.50255200 | 3.70970500  | 0.49375000  |
| C | -11.79306900 | 4.20462200  | 0.52562300  |
| H | -13.61890700 | 1.40941200  | -0.10632100 |
| H | -9.64844500  | 4.35463300  | 0.66083400  |
| F | -12.02697100 | 5.49158000  | 0.76287300  |
| F | -14.10436600 | 3.88882700  | 0.34994500  |
| H | -9.02210900  | -1.81313700 | -0.48609900 |
| H | 9.20353300   | -1.76466200 | 0.22475400  |
| H | -3.07364800  | -4.40383800 | -1.96639800 |
| H | -4.83895500  | -4.38083500 | -2.05235900 |
| H | -3.90684100  | -2.99538700 | -2.64461900 |

|   |             |             |             |
|---|-------------|-------------|-------------|
| H | -4.13025400 | -3.79935400 | 1.60672500  |
| H | -4.97550200 | -4.85233000 | 0.45986700  |
| H | -3.21066300 | -4.88313600 | 0.54938800  |
| H | 0.99449000  | 2.03725200  | 2.06889800  |
| H | -0.77102300 | 2.06560300  | 1.98938500  |
| H | 0.06064800  | 0.65218600  | 2.65949000  |
| H | 1.12056000  | 2.51705300  | -0.44499500 |
| H | 0.26608300  | 1.46971900  | -1.58988000 |
| H | -0.64477900 | 2.55271000  | -0.52401300 |
| S | 4.68952900  | -4.35433800 | 0.59784000  |
| C | 6.11019200  | -5.47165900 | 0.61455200  |
| H | 6.76663100  | -5.27634000 | 1.46376000  |
| H | 5.68935400  | -6.47184200 | 0.72154300  |
| H | 6.66794400  | -5.42387900 | -0.32162400 |

1 2 1.5 6 2.0 9 1.0

2 3 1.5 15 1.5

3 4 2.0 7 1.0

4 5 1.5 12 1.0

5 6 1.5 21 1.5

6 8 1.0

7

8

9 10 1.0 11 1.0 16 1.0

10 81 1.0 82 1.0 83 1.0

11 84 1.0 85 1.0 86 1.0

12 13 1.0 14 1.0 22 1.0

13 75 1.0 76 1.0 77 1.0

14 78 1.0 79 1.0 80 1.0

15 16 2.0 19 1.0

16 17 1.5

17 18 1.5 20 1.0

18 19 1.0 27 1.5

19

20

21 22 1.5 25 1.0

22 23 1.5

23 24 1.5 26 1.0

24 25 1.0 53 1.5

25

26

27 28 1.5 29 1.0

28 30 1.5 87 1.0

29 31 1.0

30 31 1.5 32 1.0

31 33 1.5

32

33 35 2.0 74 1.0

34 35 1.0 37 2.0 45 1.0

35 36 1.0

36 40 2.0 46 1.0

37 38 1.5 39 1.5

38 41 3.0

39 42 3.0

40

41

42

43 44 2.0 48 1.5 52 1.0

44 45 1.5 49 1.0

45 46 1.5

46 47 2.0

47 48 2.0 50 1.0

48 51 1.0

49

50

51

52

53 55 2.0 73 1.0

54 55 1.0 57 2.0 65 1.0

55 56 1.0

56 60 2.0 66 1.0

57 58 1.5 59 1.5

58 61 3.0

59 62 3.0

60

61

62

63 64 2.0 68 1.5 72 1.0

64 65 1.5 69 1.0

65 66 1.5

66 67 2.0

67 68 2.0 70 1.0

68 71 1.0

69

70

71

72

73

74

75

76

77

78

79

80

81

82

83

84

85

86

87 88 1.0

88 89 1.0 90 1.0 91 1.0

89

90

91

**Input Script of Cation ground state energy taken from ground state neutral optimized geometry of IDSTR**

`%nprocshared=3`

`%mem=2GB`

`# umpw1pw91/6-31g(d,p) geom=connectivity`

IDSTRe+



12

|   |             |             |             |
|---|-------------|-------------|-------------|
| C | -1.01814500 | -0.13715800 | 0.24836500  |
| C | -0.58373000 | -1.46880700 | 0.02121900  |
| C | -1.48920700 | -2.50670500 | -0.21909900 |
| C | -2.83754000 | -2.19687200 | -0.23049000 |
| C | -3.27106200 | -0.86738000 | -0.00349500 |
| C | -2.36388900 | 0.17165000  | 0.23752000  |
| H | -1.14045800 | -3.51990200 | -0.39171800 |
| H | -2.71383800 | 1.18461100  | 0.40960700  |
| C | 0.16357700  | 0.80058000  | 0.48475800  |
| C | 0.10793600  | 1.42361200  | 1.88828600  |
| C | 0.22966100  | 1.89964500  | -0.58691000 |
| C | -4.01750000 | -3.13640100 | -0.46965100 |
| C | -3.95489700 | -3.76406900 | -1.87070400 |
| C | -4.08716700 | -4.23212600 | 0.60521100  |
| C | 0.85562400  | -1.44452200 | 0.09523900  |
| C | 1.31756700  | -0.16900900 | 0.35544300  |
| C | 2.71259700  | -0.10259700 | 0.44791200  |
| C | 3.32332500  | -1.33771000 | 0.25342800  |
| S | 2.12442600  | -2.58872000 | -0.04523400 |
| H | 3.27957900  | 0.79403000  | 0.66669400  |
| C | -4.70903800 | -0.88073400 | -0.08102300 |
| C | -5.17089400 | -2.16476500 | -0.34715700 |
| C | -6.55556100 | -2.21301000 | -0.42971800 |
| C | -7.16706200 | -0.96297700 | -0.22661200 |
| S | -5.95339900 | 0.28238500  | 0.07246500  |
| H | -7.14781500 | -3.09890800 | -0.62839000 |

|   |              |             |             |
|---|--------------|-------------|-------------|
| C | 4.73740400   | -1.58609600 | 0.24120700  |
| C | 5.45696500   | -2.78533700 | 0.37100200  |
| S | 5.79678900   | -0.22164000 | 0.05001400  |
| C | 6.83717000   | -2.56139100 | 0.33439500  |
| C | 7.21315200   | -1.22686600 | 0.17393200  |
| H | 7.58364600   | -3.33883000 | 0.43107500  |
| C | 8.58513200   | -0.87983400 | 0.12610500  |
| C | 10.70503600  | 0.49827200  | -0.04044700 |
| C | 9.25683400   | 0.31027300  | -0.01610600 |
| C | 8.62710700   | 1.63368600  | -0.17656300 |
| C | 11.69300200  | -0.45555400 | 0.07860800  |
| C | 11.43935300  | -1.84681000 | 0.25328000  |
| C | 13.08332200  | -0.14661800 | 0.03966800  |
| O | 7.43519900   | 1.89318200  | -0.20783400 |
| N | 11.26295400  | -2.98728000 | 0.39651400  |
| N | 14.22504000  | 0.06994300  | 0.01219300  |
| C | 12.03258800  | 4.05308900  | -0.48247900 |
| C | 12.13802200  | 2.68243800  | -0.31321500 |
| C | 10.95511800  | 1.94617700  | -0.21938700 |
| C | 9.72501900   | 2.61155600  | -0.29849300 |
| C | 9.61717100   | 3.98203700  | -0.46809800 |
| C | 10.79443200  | 4.70110500  | -0.55965000 |
| H | 13.12629100  | 2.24732700  | -0.26211500 |
| H | 8.65309300   | 4.47229100  | -0.52755300 |
| F | 10.78001300  | 6.01990700  | -0.72293500 |
| F | 13.13157100  | 4.79481700  | -0.57718400 |
| C | -8.57486100  | -0.84725200 | -0.27974700 |
| C | -10.91185400 | 0.12852200  | -0.21825300 |

|   |              |             |             |
|---|--------------|-------------|-------------|
| C | -9.45642200  | 0.19829100  | -0.12833900 |
| C | -9.08832300  | 1.59625500  | 0.15779700  |
| C | -11.70316200 | -0.97136400 | -0.47403200 |
| C | -11.19574300 | -2.28301400 | -0.70265300 |
| C | -13.12513800 | -0.91052400 | -0.53779500 |
| O | -7.96935500  | 2.06054300  | 0.30331500  |
| N | -10.81364900 | -3.36477400 | -0.89298700 |
| N | -14.28603900 | -0.89752300 | -0.59704500 |
| C | -12.88582400 | 3.35802200  | 0.30768900  |
| C | -12.73116300 | 2.00525600  | 0.05331500  |
| C | -11.43176200 | 1.49463000  | 0.01921800  |
| C | -10.35062400 | 2.35674000  | 0.23990200  |
| C | -10.50255200 | 3.70970500  | 0.49375000  |
| C | -11.79306900 | 4.20462200  | 0.52562300  |
| H | -13.61890700 | 1.40941200  | -0.10632100 |
| H | -9.64844500  | 4.35463300  | 0.66083400  |
| F | -12.02697100 | 5.49158000  | 0.76287300  |
| F | -14.10436600 | 3.88882700  | 0.34994500  |
| H | -9.02210900  | -1.81313700 | -0.48609900 |
| H | 9.20353300   | -1.76466200 | 0.22475400  |
| H | -3.07364800  | -4.40383800 | -1.96639800 |
| H | -4.83895500  | -4.38083500 | -2.05235900 |
| H | -3.90684100  | -2.99538700 | -2.64461900 |
| H | -4.13025400  | -3.79935400 | 1.60672500  |
| H | -4.97550200  | -4.85233000 | 0.45986700  |
| H | -3.21066300  | -4.88313600 | 0.54938800  |
| H | 0.99449000   | 2.03725200  | 2.06889800  |
| H | -0.77102300  | 2.06560300  | 1.98938500  |

|   |             |             |             |
|---|-------------|-------------|-------------|
| H | 0.06064800  | 0.65218600  | 2.65949000  |
| H | 1.12056000  | 2.51705300  | -0.44499500 |
| H | 0.26608300  | 1.46971900  | -1.58988000 |
| H | -0.64477900 | 2.55271000  | -0.52401300 |
| S | 4.68952900  | -4.35433800 | 0.59784000  |
| C | 6.11019200  | -5.47165900 | 0.61455200  |
| H | 6.76663100  | -5.27634000 | 1.46376000  |
| H | 5.68935400  | -6.47184200 | 0.72154300  |
| H | 6.66794400  | -5.42387900 | -0.32162400 |

1 2 1.5 6 2.0 9 1.0

2 3 1.5 15 1.5

3 4 2.0 7 1.0

4 5 1.5 12 1.0

5 6 1.5 21 1.5

6 8 1.0

7

8

9 10 1.0 11 1.0 16 1.0

10 81 1.0 82 1.0 83 1.0

11 84 1.0 85 1.0 86 1.0

12 13 1.0 14 1.0 22 1.0

13 75 1.0 76 1.0 77 1.0

14 78 1.0 79 1.0 80 1.0

15 16 2.0 19 1.0

16 17 1.5

17 18 1.5 20 1.0

18 19 1.0 27 1.5

19

20

21 22 1.5 25 1.0

22 23 1.5

23 24 1.5 26 1.0

24 25 1.0 53 1.5

25

26

27 28 1.5 29 1.0

28 30 1.5 87 1.0

29 31 1.0

30 31 1.5 32 1.0

31 33 1.5

32

33 35 2.0 74 1.0

34 35 1.0 37 2.0 45 1.0

35 36 1.0

36 40 2.0 46 1.0

37 38 1.5 39 1.5

38 41 3.0

39 42 3.0

40

41

42

43 44 2.0 48 1.5 52 1.0

44 45 1.5 49 1.0

45 46 1.5

46 47 2.0

47 48 2.0 50 1.0

48 51 1.0

49

50

51

52

53 55 2.0 73 1.0

54 55 1.0 57 2.0 65 1.0

55 56 1.0

56 60 2.0 66 1.0

57 58 1.5 59 1.5

58 61 3.0

59 62 3.0

60

61

62

63 64 2.0 68 1.5 72 1.0

64 65 1.5 69 1.0

65 66 1.5

66 67 2.0

67 68 2.0 70 1.0

68 71 1.0

69

70

71

72

73

74

75

76

77

78

79

80

81

82

83

84

85

86

87 88 1.0

88 89 1.0 90 1.0 91 1.0

89

90

91

**Input Script of Anion ground state energy taken from ground state neutral optimized geometry of IDSTR**

%nprocshared=3

%mem=2GB

# umpw1pw91/6-31g(d,p) geom=connectivity

IDSTRe-

-1 2

C -1.01814500 -0.13715800 0.24836500

C -0.58373000 -1.46880700 0.02121900

C -1.48920700 -2.50670500 -0.21909900

|   |             |             |             |
|---|-------------|-------------|-------------|
| C | -2.83754000 | -2.19687200 | -0.23049000 |
| C | -3.27106200 | -0.86738000 | -0.00349500 |
| C | -2.36388900 | 0.17165000  | 0.23752000  |
| H | -1.14045800 | -3.51990200 | -0.39171800 |
| H | -2.71383800 | 1.18461100  | 0.40960700  |
| C | 0.16357700  | 0.80058000  | 0.48475800  |
| C | 0.10793600  | 1.42361200  | 1.88828600  |
| C | 0.22966100  | 1.89964500  | -0.58691000 |
| C | -4.01750000 | -3.13640100 | -0.46965100 |
| C | -3.95489700 | -3.76406900 | -1.87070400 |
| C | -4.08716700 | -4.23212600 | 0.60521100  |
| C | 0.85562400  | -1.44452200 | 0.09523900  |
| C | 1.31756700  | -0.16900900 | 0.35544300  |
| C | 2.71259700  | -0.10259700 | 0.44791200  |
| C | 3.32332500  | -1.33771000 | 0.25342800  |
| S | 2.12442600  | -2.58872000 | -0.04523400 |
| H | 3.27957900  | 0.79403000  | 0.66669400  |
| C | -4.70903800 | -0.88073400 | -0.08102300 |
| C | -5.17089400 | -2.16476500 | -0.34715700 |
| C | -6.55556100 | -2.21301000 | -0.42971800 |
| C | -7.16706200 | -0.96297700 | -0.22661200 |
| S | -5.95339900 | 0.28238500  | 0.07246500  |
| H | -7.14781500 | -3.09890800 | -0.62839000 |
| C | 4.73740400  | -1.58609600 | 0.24120700  |
| C | 5.45696500  | -2.78533700 | 0.37100200  |
| S | 5.79678900  | -0.22164000 | 0.05001400  |
| C | 6.83717000  | -2.56139100 | 0.33439500  |
| C | 7.21315200  | -1.22686600 | 0.17393200  |



|   |              |             |             |
|---|--------------|-------------|-------------|
| H | 7.58364600   | -3.33883000 | 0.43107500  |
| C | 8.58513200   | -0.87983400 | 0.12610500  |
| C | 10.70503600  | 0.49827200  | -0.04044700 |
| C | 9.25683400   | 0.31027300  | -0.01610600 |
| C | 8.62710700   | 1.63368600  | -0.17656300 |
| C | 11.69300200  | -0.45555400 | 0.07860800  |
| C | 11.43935300  | -1.84681000 | 0.25328000  |
| C | 13.08332200  | -0.14661800 | 0.03966800  |
| O | 7.43519900   | 1.89318200  | -0.20783400 |
| N | 11.26295400  | -2.98728000 | 0.39651400  |
| N | 14.22504000  | 0.06994300  | 0.01219300  |
| C | 12.03258800  | 4.05308900  | -0.48247900 |
| C | 12.13802200  | 2.68243800  | -0.31321500 |
| C | 10.95511800  | 1.94617700  | -0.21938700 |
| C | 9.72501900   | 2.61155600  | -0.29849300 |
| C | 9.61717100   | 3.98203700  | -0.46809800 |
| C | 10.79443200  | 4.70110500  | -0.55965000 |
| H | 13.12629100  | 2.24732700  | -0.26211500 |
| H | 8.65309300   | 4.47229100  | -0.52755300 |
| F | 10.78001300  | 6.01990700  | -0.72293500 |
| F | 13.13157100  | 4.79481700  | -0.57718400 |
| C | -8.57486100  | -0.84725200 | -0.27974700 |
| C | -10.91185400 | 0.12852200  | -0.21825300 |
| C | -9.45642200  | 0.19829100  | -0.12833900 |
| C | -9.08832300  | 1.59625500  | 0.15779700  |
| C | -11.70316200 | -0.97136400 | -0.47403200 |
| C | -11.19574300 | -2.28301400 | -0.70265300 |
| C | -13.12513800 | -0.91052400 | -0.53779500 |

|   |              |             |             |
|---|--------------|-------------|-------------|
| O | -7.96935500  | 2.06054300  | 0.30331500  |
| N | -10.81364900 | -3.36477400 | -0.89298700 |
| N | -14.28603900 | -0.89752300 | -0.59704500 |
| C | -12.88582400 | 3.35802200  | 0.30768900  |
| C | -12.73116300 | 2.00525600  | 0.05331500  |
| C | -11.43176200 | 1.49463000  | 0.01921800  |
| C | -10.35062400 | 2.35674000  | 0.23990200  |
| C | -10.50255200 | 3.70970500  | 0.49375000  |
| C | -11.79306900 | 4.20462200  | 0.52562300  |
| H | -13.61890700 | 1.40941200  | -0.10632100 |
| H | -9.64844500  | 4.35463300  | 0.66083400  |
| F | -12.02697100 | 5.49158000  | 0.76287300  |
| F | -14.10436600 | 3.88882700  | 0.34994500  |
| H | -9.02210900  | -1.81313700 | -0.48609900 |
| H | 9.20353300   | -1.76466200 | 0.22475400  |
| H | -3.07364800  | -4.40383800 | -1.96639800 |
| H | -4.83895500  | -4.38083500 | -2.05235900 |
| H | -3.90684100  | -2.99538700 | -2.64461900 |
| H | -4.13025400  | -3.79935400 | 1.60672500  |
| H | -4.97550200  | -4.85233000 | 0.45986700  |
| H | -3.21066300  | -4.88313600 | 0.54938800  |
| H | 0.99449000   | 2.03725200  | 2.06889800  |
| H | -0.77102300  | 2.06560300  | 1.98938500  |
| H | 0.06064800   | 0.65218600  | 2.65949000  |
| H | 1.12056000   | 2.51705300  | -0.44499500 |
| H | 0.26608300   | 1.46971900  | -1.58988000 |
| H | -0.64477900  | 2.55271000  | -0.52401300 |
| S | 4.68952900   | -4.35433800 | 0.59784000  |

|   |            |             |             |
|---|------------|-------------|-------------|
| C | 6.11019200 | -5.47165900 | 0.61455200  |
| H | 6.76663100 | -5.27634000 | 1.46376000  |
| H | 5.68935400 | -6.47184200 | 0.72154300  |
| H | 6.66794400 | -5.42387900 | -0.32162400 |

1 2 1.5 6 2.0 9 1.0

2 3 1.5 15 1.5

3 4 2.0 7 1.0

4 5 1.5 12 1.0

5 6 1.5 21 1.5

6 8 1.0

7

8

9 10 1.0 11 1.0 16 1.0

10 81 1.0 82 1.0 83 1.0

11 84 1.0 85 1.0 86 1.0

12 13 1.0 14 1.0 22 1.0

13 75 1.0 76 1.0 77 1.0

14 78 1.0 79 1.0 80 1.0

15 16 2.0 19 1.0

16 17 1.5

17 18 1.5 20 1.0

18 19 1.0 27 1.5

19

20

21 22 1.5 25 1.0

22 23 1.5

23 24 1.5 26 1.0

24 25 1.0 53 1.5

25

26

27 28 1.5 29 1.0

28 30 1.5 87 1.0

29 31 1.0

30 31 1.5 32 1.0

31 33 1.5

32

33 35 2.0 74 1.0

34 35 1.0 37 2.0 45 1.0

35 36 1.0

36 40 2.0 46 1.0

37 38 1.5 39 1.5

38 41 3.0

39 42 3.0

40

41

42

43 44 2.0 48 1.5 52 1.0

44 45 1.5 49 1.0

45 46 1.5

46 47 2.0

47 48 2.0 50 1.0

48 51 1.0

49

50

51

52

53 55 2.0 73 1.0

54 55 1.0 57 2.0 65 1.0

55 56 1.0

56 60 2.0 66 1.0

57 58 1.5 59 1.5

58 61 3.0

59 62 3.0

60

61

62

63 64 2.0 68 1.5 72 1.0

64 65 1.5 69 1.0

65 66 1.5

66 67 2.0

67 68 2.0 70 1.0

68 71 1.0

69

70

71

72

73

74

75

76

77

78

79

80

81

82

83

84

85

86

87 88 1.0

88 89 1.0 90 1.0 91 1.0

89

90

91

**Input Script of neutral ground state energy taken from ground state neutral optimized geometry of IDSTR**

%nprocshared=3

%mem=2GB

# rmpw1pw91/6-31g(d,p) geom=connectivity

IDSTRe0

0 1

C -1.01814500 -0.13715800 0.24836500

C -0.58373000 -1.46880700 0.02121900

C -1.48920700 -2.50670500 -0.21909900

C -2.83754000 -2.19687200 -0.23049000

C -3.27106200 -0.86738000 -0.00349500

C -2.36388900 0.17165000 0.23752000

H -1.14045800 -3.51990200 -0.39171800

H -2.71383800 1.18461100 0.40960700

|   |             |             |             |
|---|-------------|-------------|-------------|
| C | 0.16357700  | 0.80058000  | 0.48475800  |
| C | 0.10793600  | 1.42361200  | 1.88828600  |
| C | 0.22966100  | 1.89964500  | -0.58691000 |
| C | -4.01750000 | -3.13640100 | -0.46965100 |
| C | -3.95489700 | -3.76406900 | -1.87070400 |
| C | -4.08716700 | -4.23212600 | 0.60521100  |
| C | 0.85562400  | -1.44452200 | 0.09523900  |
| C | 1.31756700  | -0.16900900 | 0.35544300  |
| C | 2.71259700  | -0.10259700 | 0.44791200  |
| C | 3.32332500  | -1.33771000 | 0.25342800  |
| S | 2.12442600  | -2.58872000 | -0.04523400 |
| H | 3.27957900  | 0.79403000  | 0.66669400  |
| C | -4.70903800 | -0.88073400 | -0.08102300 |
| C | -5.17089400 | -2.16476500 | -0.34715700 |
| C | -6.55556100 | -2.21301000 | -0.42971800 |
| C | -7.16706200 | -0.96297700 | -0.22661200 |
| S | -5.95339900 | 0.28238500  | 0.07246500  |
| H | -7.14781500 | -3.09890800 | -0.62839000 |
| C | 4.73740400  | -1.58609600 | 0.24120700  |
| C | 5.45696500  | -2.78533700 | 0.37100200  |
| S | 5.79678900  | -0.22164000 | 0.05001400  |
| C | 6.83717000  | -2.56139100 | 0.33439500  |
| C | 7.21315200  | -1.22686600 | 0.17393200  |
| H | 7.58364600  | -3.33883000 | 0.43107500  |
| C | 8.58513200  | -0.87983400 | 0.12610500  |
| C | 10.70503600 | 0.49827200  | -0.04044700 |
| C | 9.25683400  | 0.31027300  | -0.01610600 |
| C | 8.62710700  | 1.63368600  | -0.17656300 |

|   |              |             |             |
|---|--------------|-------------|-------------|
| C | 11.69300200  | -0.45555400 | 0.07860800  |
| C | 11.43935300  | -1.84681000 | 0.25328000  |
| C | 13.08332200  | -0.14661800 | 0.03966800  |
| O | 7.43519900   | 1.89318200  | -0.20783400 |
| N | 11.26295400  | -2.98728000 | 0.39651400  |
| N | 14.22504000  | 0.06994300  | 0.01219300  |
| C | 12.03258800  | 4.05308900  | -0.48247900 |
| C | 12.13802200  | 2.68243800  | -0.31321500 |
| C | 10.95511800  | 1.94617700  | -0.21938700 |
| C | 9.72501900   | 2.61155600  | -0.29849300 |
| C | 9.61717100   | 3.98203700  | -0.46809800 |
| C | 10.79443200  | 4.70110500  | -0.55965000 |
| H | 13.12629100  | 2.24732700  | -0.26211500 |
| H | 8.65309300   | 4.47229100  | -0.52755300 |
| F | 10.78001300  | 6.01990700  | -0.72293500 |
| F | 13.13157100  | 4.79481700  | -0.57718400 |
| C | -8.57486100  | -0.84725200 | -0.27974700 |
| C | -10.91185400 | 0.12852200  | -0.21825300 |
| C | -9.45642200  | 0.19829100  | -0.12833900 |
| C | -9.08832300  | 1.59625500  | 0.15779700  |
| C | -11.70316200 | -0.97136400 | -0.47403200 |
| C | -11.19574300 | -2.28301400 | -0.70265300 |
| C | -13.12513800 | -0.91052400 | -0.53779500 |
| O | -7.96935500  | 2.06054300  | 0.30331500  |
| N | -10.81364900 | -3.36477400 | -0.89298700 |
| N | -14.28603900 | -0.89752300 | -0.59704500 |
| C | -12.88582400 | 3.35802200  | 0.30768900  |
| C | -12.73116300 | 2.00525600  | 0.05331500  |



|   |              |             |             |
|---|--------------|-------------|-------------|
| C | -11.43176200 | 1.49463000  | 0.01921800  |
| C | -10.35062400 | 2.35674000  | 0.23990200  |
| C | -10.50255200 | 3.70970500  | 0.49375000  |
| C | -11.79306900 | 4.20462200  | 0.52562300  |
| H | -13.61890700 | 1.40941200  | -0.10632100 |
| H | -9.64844500  | 4.35463300  | 0.66083400  |
| F | -12.02697100 | 5.49158000  | 0.76287300  |
| F | -14.10436600 | 3.88882700  | 0.34994500  |
| H | -9.02210900  | -1.81313700 | -0.48609900 |
| H | 9.20353300   | -1.76466200 | 0.22475400  |
| H | -3.07364800  | -4.40383800 | -1.96639800 |
| H | -4.83895500  | -4.38083500 | -2.05235900 |
| H | -3.90684100  | -2.99538700 | -2.64461900 |
| H | -4.13025400  | -3.79935400 | 1.60672500  |
| H | -4.97550200  | -4.85233000 | 0.45986700  |
| H | -3.21066300  | -4.88313600 | 0.54938800  |
| H | 0.99449000   | 2.03725200  | 2.06889800  |
| H | -0.77102300  | 2.06560300  | 1.98938500  |
| H | 0.06064800   | 0.65218600  | 2.65949000  |
| H | 1.12056000   | 2.51705300  | -0.44499500 |
| H | 0.26608300   | 1.46971900  | -1.58988000 |
| H | -0.64477900  | 2.55271000  | -0.52401300 |
| S | 4.68952900   | -4.35433800 | 0.59784000  |
| C | 6.11019200   | -5.47165900 | 0.61455200  |
| H | 6.76663100   | -5.27634000 | 1.46376000  |
| H | 5.68935400   | -6.47184200 | 0.72154300  |
| H | 6.66794400   | -5.42387900 | -0.32162400 |

1 2 1.5 6 2.0 9 1.0

2 3 1.5 15 1.5

3 4 2.0 7 1.0

4 5 1.5 12 1.0

5 6 1.5 21 1.5

6 8 1.0

7

8

9 10 1.0 11 1.0 16 1.0

10 81 1.0 82 1.0 83 1.0

11 84 1.0 85 1.0 86 1.0

12 13 1.0 14 1.0 22 1.0

13 75 1.0 76 1.0 77 1.0

14 78 1.0 79 1.0 80 1.0

15 16 2.0 19 1.0

16 17 1.5

17 18 1.5 20 1.0

18 19 1.0 27 1.5

19

20

21 22 1.5 25 1.0

22 23 1.5

23 24 1.5 26 1.0

24 25 1.0 53 1.5

25

26

27 28 1.5 29 1.0

28 30 1.5 87 1.0

29 31 1.0  
30 31 1.5 32 1.0  
31 33 1.5  
32  
33 35 2.0 74 1.0  
34 35 1.0 37 2.0 45 1.0  
35 36 1.0  
36 40 2.0 46 1.0  
37 38 1.5 39 1.5  
38 41 3.0  
39 42 3.0  
40  
41  
42  
43 44 2.0 48 1.5 52 1.0  
44 45 1.5 49 1.0  
45 46 1.5  
46 47 2.0  
47 48 2.0 50 1.0  
48 51 1.0  
49  
50  
51  
52  
53 55 2.0 73 1.0  
54 55 1.0 57 2.0 65 1.0  
55 56 1.0  
56 60 2.0 66 1.0

57 58 1.5 59 1.5

58 61 3.0

59 62 3.0

60

61

62

63 64 2.0 68 1.5 72 1.0

64 65 1.5 69 1.0

65 66 1.5

66 67 2.0

67 68 2.0 70 1.0

68 71 1.0

69

70

71

72

73

74

75

76

77

78

79

80

81

82

83

84

85

86

87 88 1.0

88 89 1.0 90 1.0 91 1.0

89

90

91

### **Input Script of energy of cation taken from cation optimized geometry of IDSTR**

%nprocshared=3

%mem=2GB

# umpw1pw91/6-31g(d,p) geom=connectivity

IDSTR+e+

1 2

|   |             |             |             |
|---|-------------|-------------|-------------|
| C | 1.00935900  | -0.11813900 | 0.00052200  |
| C | 0.57691700  | -1.48265300 | 0.00029700  |
| C | 1.49329000  | -2.55404000 | 0.00002100  |
| C | 2.83154300  | -2.24886400 | -0.00004200 |
| C | 3.26280800  | -0.88396400 | 0.00017600  |
| C | 2.34970800  | 0.18559100  | 0.00046100  |
| H | 1.14399000  | -3.58119300 | -0.00013700 |
| H | 2.70117700  | 1.21182300  | 0.00062700  |
| C | -0.17515700 | 0.84419600  | 0.00081400  |
| C | -0.18616300 | 1.71983300  | -1.26267000 |
| C | -0.18597200 | 1.71927500  | 1.26469200  |
| C | 4.02161400  | -3.20500700 | -0.00033600 |
| C | 4.03633600  | -4.08137300 | 1.26261200  |

|   |              |             |             |
|---|--------------|-------------|-------------|
| C | 4.03606200   | -4.08095600 | -1.26357300 |
| C | -0.83810800  | -1.45814600 | 0.00040200  |
| C | -1.32275500  | -0.13962600 | 0.00068100  |
| C | -2.69942400  | -0.07318400 | 0.00073600  |
| C | -3.30977700  | -1.34871400 | 0.00050000  |
| S | -2.09666700  | -2.62608100 | 0.00021900  |
| H | -3.27767700  | 0.84233700  | 0.00096600  |
| C | 4.68729900   | -0.90000600 | 0.00002500  |
| C | 5.16185400   | -2.21265100 | -0.00028100 |
| C | 6.54827800   | -2.26262700 | -0.00041200 |
| C | 7.14145400   | -0.98758100 | -0.00020400 |
| S | 5.92950400   | 0.28513500  | 0.00015800  |
| H | 7.15105500   | -3.16294100 | -0.00063300 |
| C | -4.70206400  | -1.59340700 | 0.00045500  |
| C | -5.42703900  | -2.81239100 | 0.00050300  |
| S | -5.77990200  | -0.21259400 | 0.00044100  |
| C | -6.80777300  | -2.58319900 | 0.00039200  |
| C | -7.17703100  | -1.23984300 | 0.00025700  |
| H | -7.55450700  | -3.36564500 | 0.00031500  |
| C | -8.56536800  | -0.89527700 | -0.00005800 |
| C | -10.68545700 | 0.49988300  | -0.00062300 |
| C | -9.22822500  | 0.29626600  | -0.00032300 |
| C | -8.59146200  | 1.63851400  | -0.00014400 |
| C | -11.66618500 | -0.46186300 | -0.00125200 |
| C | -11.40079300 | -1.86300500 | -0.00169800 |
| C | -13.05781500 | -0.15213900 | -0.00152500 |
| O | -7.39561800  | 1.87456600  | -0.00007000 |
| N | -11.19836600 | -3.00740000 | -0.00205600 |

|   |              |             |             |
|---|--------------|-------------|-------------|
| N | -14.19793900 | 0.06957500  | -0.00175600 |
| C | -11.98396400 | 4.08420800  | 0.00014200  |
| C | -12.09687500 | 2.70452900  | -0.00018100 |
| C | -10.91711600 | 1.95624200  | -0.00027700 |
| C | -9.68062400  | 2.62102200  | -0.00003600 |
| C | -9.56604700  | 4.00340400  | 0.00027400  |
| C | -10.73897800 | 4.73274500  | 0.00035700  |
| H | -13.08798800 | 2.27279100  | -0.00033000 |
| H | -8.60129600  | 4.49558500  | 0.00044600  |
| F | -10.72062100 | 6.05615300  | 0.00064700  |
| F | -13.07270600 | 4.83618500  | 0.00025800  |
| C | 8.56339000   | -0.87602100 | -0.00027700 |
| C | 10.89401600  | 0.12790500  | -0.00006100 |
| C | 9.42533200   | 0.18457300  | -0.00002700 |
| C | 9.03509500   | 1.61641000  | 0.00002600  |
| C | 11.69341400  | -0.99016200 | 0.00024400  |
| C | 11.19189900  | -2.32482800 | 0.00067500  |
| C | 13.11765100  | -0.92689000 | 0.00019400  |
| O | 7.90144100   | 2.06364400  | 0.00016800  |
| N | 10.80150400  | -3.41956600 | 0.00102200  |
| N | 14.27911800  | -0.90798300 | 0.00015000  |
| C | 12.80537800  | 3.42836500  | -0.00074300 |
| C | 12.67388700  | 2.05026800  | -0.00058100 |
| C | 11.38089500  | 1.52108200  | -0.00030700 |
| C | 10.28146100  | 2.39266800  | -0.00020800 |
| C | 10.41123200  | 3.77327900  | -0.00035500 |
| C | 11.69423600  | 4.28521400  | -0.00062700 |
| H | 13.57334900  | 1.45067200  | -0.00068800 |

|   |             |             |             |
|---|-------------|-------------|-------------|
| H | 9.54745700  | 4.42673500  | -0.00026600 |
| F | 11.90864300 | 5.59210000  | -0.00079500 |
| F | 14.01036400 | 3.97756200  | -0.00102100 |
| H | 9.01682900  | -1.86022400 | -0.00056500 |
| H | -9.17819700 | -1.78857800 | -0.00008900 |
| H | 3.16975400  | -4.74691400 | 1.27752700  |
| H | 4.93434000  | -4.70329700 | 1.28021400  |
| H | 4.02111300  | -3.47349600 | 2.16931800  |
| H | 4.02064500  | -3.47278200 | -2.17007600 |
| H | 4.93406000  | -4.70287700 | -1.28157200 |
| H | 3.16947800  | -4.74649400 | -1.27852200 |
| H | -1.07661200 | 2.35272200  | -1.27839600 |
| H | 0.68858400  | 2.37403900  | -1.27888700 |
| H | -0.17809300 | 1.11179500  | -2.16930300 |
| H | -1.07641500 | 2.35216100  | 1.28083500  |
| H | -0.17776900 | 1.11083400  | 2.17105400  |
| H | 0.68878300  | 2.37346800  | 1.28107000  |
| S | -4.67125300 | -4.38258800 | 0.00064700  |
| C | -6.08217900 | -5.51276400 | 0.00085100  |
| H | -6.68674600 | -5.39130900 | -0.89834000 |
| H | -5.64661500 | -6.51210100 | 0.00025900  |
| H | -6.68590100 | -5.39203300 | 0.90070600  |

1 2 1.5 6 2.0 9 1.0

2 3 1.5 15 1.5

3 4 2.0 7 1.0

4 5 1.5 12 1.0

5 6 1.5 21 1.5



6 8 1.0

7

8

9 10 1.0 11 1.0 16 1.0

10 81 1.0 82 1.0 83 1.0

11 84 1.0 85 1.0 86 1.0

12 13 1.0 14 1.0 22 1.0

13 75 1.0 76 1.0 77 1.0

14 78 1.0 79 1.0 80 1.0

15 16 1.5 19 1.0

16 17 2.0

17 18 1.5 20 1.0

18 19 1.0 27 1.5

19

20

21 22 1.5 25 1.0

22 23 1.5

23 24 1.5 26 1.0

24 25 1.0 53 1.5

25

26

27 28 1.5 29 1.0

28 30 1.5 87 1.0

29 31 1.0

30 31 1.5 32 1.0

31 33 1.5

32

33 35 2.0 74 1.0

34 35 1.0 37 2.0 45 1.0

35 36 1.0

36 40 2.0 46 1.0

37 38 1.5 39 1.5

38 41 3.0

39 42 3.0

40

41

42

43 44 2.0 48 1.5 52 1.0

44 45 1.5 49 1.0

45 46 1.5

46 47 1.5

47 48 2.0 50 1.0

48 51 1.0

49

50

51

52

53 55 2.0 73 1.0

54 55 1.0 57 2.0 65 1.0

55 56 1.0

56 60 2.0 66 1.0

57 58 1.5 59 1.5

58 61 3.0

59 62 3.0

60

61

62

63 64 2.0 68 1.5 72 1.0

64 65 1.5 69 1.0

65 66 1.5

66 67 1.5

67 68 2.0 70 1.0

68 71 1.0

69

70

71

72

73

74

75

76

77

78

79

80

81

82

83

84

85

86

87 88 1.0

88 89 1.0 90 1.0 91 1.0

89

90

91

### Input Script of energy of anion taken from anion optimized geometry of IDSTR

%nprocshared=3

%mem=2GB

# umpw1pw91/6-31g(d,p) geom=connectivity

IDSTR-e-

-1 2

|   |             |             |             |
|---|-------------|-------------|-------------|
| C | 1.01964500  | -0.13261000 | -0.00069600 |
| C | 0.58815500  | -1.49125900 | 0.00042800  |
| C | 1.51602400  | -2.54705800 | 0.00152500  |
| C | 2.85742500  | -2.23048600 | 0.00147000  |
| C | 3.28842000  | -0.87433500 | 0.00032800  |
| C | 2.35873300  | 0.18262200  | -0.00076500 |
| H | 1.17797200  | -3.57872200 | 0.00239600  |
| H | 2.69780500  | 1.21400500  | -0.00163500 |
| C | -0.17507500 | 0.81994300  | -0.00175000 |
| C | -0.18874700 | 1.69529600  | -1.26353500 |
| C | -0.18917900 | 1.69761300  | 1.25840900  |
| C | 4.04988600  | -3.18602600 | 0.00253700  |
| C | 4.06026300  | -4.06152400 | 1.26414600  |
| C | 4.06068400  | -4.06387300 | -1.25742600 |
| C | -0.83802200 | -1.46873500 | 0.00019300  |
| C | -1.32296000 | -0.16668400 | -0.00104300 |
| C | -2.71063600 | -0.09268700 | -0.00147500 |
| C | -3.32841000 | -1.35304800 | -0.00057200 |

|   |              |             |             |
|---|--------------|-------------|-------------|
| S | -2.10705500  | -2.63092100 | 0.00096400  |
| H | -3.28422900  | 0.82603400  | -0.00260200 |
| C | 4.71388100   | -0.88755600 | 0.00054200  |
| C | 5.19808500   | -2.19946500 | 0.00180300  |
| C | 6.57648300   | -2.25502000 | 0.00202200  |
| C | 7.19404200   | -0.97921200 | 0.00090300  |
| S | 5.96014700   | 0.29515700  | -0.00042200 |
| H | 7.17567400   | -3.15836100 | 0.00292800  |
| C | -4.72521100  | -1.59735000 | -0.00051600 |
| C | -5.46197500  | -2.80382100 | -0.00121600 |
| S | -5.80571100  | -0.21581800 | 0.00043200  |
| C | -6.83421800  | -2.58546300 | -0.00113800 |
| C | -7.22850000  | -1.23512900 | -0.00036000 |
| H | -7.57945900  | -3.36955900 | -0.00168500 |
| C | -8.58585700  | -0.88967100 | -0.00018400 |
| C | -10.70171800 | 0.49837400  | 0.00061300  |
| C | -9.27464900  | 0.32506700  | 0.00053800  |
| C | -8.65240200  | 1.65335400  | 0.00127800  |
| C | -11.70246100 | -0.47557100 | 0.00012800  |
| C | -11.45856700 | -1.87515800 | -0.00050700 |
| C | -13.08852600 | -0.16673300 | 0.00024300  |
| O | -7.46239200  | 1.93693300  | 0.00152700  |
| N | -11.30646700 | -3.03064100 | -0.00103700 |
| N | -14.23402800 | 0.04689900  | 0.00031500  |
| C | -12.07170400 | 4.07589800  | 0.00252600  |
| C | -12.16473500 | 2.68988600  | 0.00176100  |
| C | -10.97827800 | 1.95755900  | 0.00138800  |
| C | -9.75656600  | 2.64151700  | 0.00179800  |

|   |              |             |             |
|---|--------------|-------------|-------------|
| C | -9.66081400  | 4.01988700  | 0.00257000  |
| C | -10.84636000 | 4.73857100  | 0.00292700  |
| H | -13.14861500 | 2.24175400  | 0.00149600  |
| H | -8.69946500  | 4.51948300  | 0.00288200  |
| F | -10.83809500 | 6.07561800  | 0.00366000  |
| F | -13.18707200 | 4.81227300  | 0.00290100  |
| C | 8.58850700   | -0.86311800 | 0.00093700  |
| C | 10.91610600  | 0.13097900  | 0.00014600  |
| C | 9.47703200   | 0.21182500  | -0.00004400 |
| C | 9.09918000   | 1.62926800  | -0.00161300 |
| C | 11.72903400  | -0.99995300 | 0.00146600  |
| C | 11.24419700  | -2.33623400 | 0.00296200  |
| C | 13.14878500  | -0.93838300 | 0.00145900  |
| O | 7.97892000   | 2.11900100  | -0.00219500 |
| N | 10.89309900  | -3.44695400 | 0.00421200  |
| N | 14.31348400  | -0.92898900 | 0.00149700  |
| C | 12.89162600  | 3.41257400  | -0.00344900 |
| C | 12.74059000  | 2.03251200  | -0.00188300 |
| C | 11.44360900  | 1.51952900  | -0.00137000 |
| C | 10.36059600  | 2.40605100  | -0.00242000 |
| C | 10.50750700  | 3.78041300  | -0.00396900 |
| C | 11.79998800  | 4.27962000  | -0.00448600 |
| H | 13.63076000  | 1.41915000  | -0.00113800 |
| H | 9.64850900   | 4.44064500  | -0.00475000 |
| F | 12.02669200  | 5.59616800  | -0.00598000 |
| F | 14.11739900  | 3.94346500  | -0.00399500 |
| H | 9.05052700   | -1.84390600 | 0.00193800  |
| H | -9.20848000  | -1.77669000 | -0.00071000 |

|   |             |             |             |
|---|-------------|-------------|-------------|
| H | 3.18501300  | -4.71686100 | 1.28584200  |
| H | 4.95468700  | -4.69030900 | 1.28580500  |
| H | 4.05090500  | -3.44662900 | 2.16641200  |
| H | 4.05158500  | -3.45066600 | -2.16084400 |
| H | 4.95513700  | -4.69266600 | -1.27763600 |
| H | 3.18547300  | -4.71929400 | -1.27818200 |
| H | -1.08694700 | 2.31853700  | -1.28632100 |
| H | 0.68255500  | 2.35581300  | -1.28387700 |
| H | -0.17499000 | 1.08032700  | -2.16567500 |
| H | -1.08741000 | 2.32086100  | 1.27976900  |
| H | -0.17569000 | 1.08431000  | 2.16168700  |
| H | 0.68208700  | 2.35820800  | 1.27782600  |
| S | -4.70036500 | -4.39526800 | -0.00238700 |
| C | -6.13213300 | -5.49730500 | -0.00222200 |
| H | -6.74137400 | -5.36186600 | -0.89715000 |
| H | -5.72332400 | -6.50837500 | -0.00263600 |
| H | -6.74077500 | -5.36233900 | 0.89318400  |

1 2 1.5 6 2.0 9 1.0

2 3 1.5 15 1.5

3 4 2.0 7 1.0

4 5 1.5 12 1.0

5 6 1.5 21 1.5

6 8 1.0

7

8

9 10 1.0 11 1.0 16 1.0

10 81 1.0 82 1.0 83 1.0

11 84 1.0 85 1.0 86 1.0

12 13 1.0 14 1.0 22 1.0

13 75 1.0 76 1.0 77 1.0

14 78 1.0 79 1.0 80 1.0

15 16 1.5 19 1.0

16 17 1.5

17 18 1.5 20 1.0

18 19 1.0 27 1.5

19

20

21 22 1.5 25 1.0

22 23 2.0

23 24 1.5 26 1.0

24 25 1.0 53 1.5

25

26

27 28 1.5 29 1.0

28 30 1.5 87 1.0

29 31 1.0

30 31 1.5 32 1.0

31 33 1.5

32

33 35 1.5 74 1.0

34 35 1.5 37 1.5 45 1.0

35 36 1.0

36 40 2.0 46 1.0

37 38 1.5 39 1.5

38 41 3.0



39 42 3.0  
40  
41  
42  
43 44 1.5 48 1.5 52 1.0  
44 45 1.5 49 1.0  
45 46 1.5  
46 47 2.0  
47 48 1.5 50 1.0  
48 51 1.0  
49  
50  
51  
52  
53 55 1.5 73 1.0  
54 55 1.5 57 1.5 65 1.0  
55 56 1.0  
56 60 2.0 66 1.0  
57 58 1.5 59 1.5  
58 61 3.0  
59 62 3.0  
60  
61  
62  
63 64 1.5 68 1.5 72 1.0  
64 65 1.5 69 1.0  
65 66 1.5  
66 67 2.0

67 68 2.0 70 1.0

68 71 1.0

69

70

71

72

73

74

75

76

77

78

79

80

81

82

83

84

85

86

87 88 1.0

88 89 1.0 90 1.0 91 1.0

89

90

91

**Input Script of neutral molecules' energies, that are calculated utilizing optimized cation geometries of IDSTR**

%nprocshared=3

%mem=2GB

# umpw1pw91/6-31g(d,p) geom=connectivity

IDSTR+e0

0 1

|   |             |             |             |
|---|-------------|-------------|-------------|
| C | 1.00935900  | -0.11813900 | 0.00052200  |
| C | 0.57691700  | -1.48265300 | 0.00029700  |
| C | 1.49329000  | -2.55404000 | 0.00002100  |
| C | 2.83154300  | -2.24886400 | -0.00004200 |
| C | 3.26280800  | -0.88396400 | 0.00017600  |
| C | 2.34970800  | 0.18559100  | 0.00046100  |
| H | 1.14399000  | -3.58119300 | -0.00013700 |
| H | 2.70117700  | 1.21182300  | 0.00062700  |
| C | -0.17515700 | 0.84419600  | 0.00081400  |
| C | -0.18616300 | 1.71983300  | -1.26267000 |
| C | -0.18597200 | 1.71927500  | 1.26469200  |
| C | 4.02161400  | -3.20500700 | -0.00033600 |
| C | 4.03633600  | -4.08137300 | 1.26261200  |
| C | 4.03606200  | -4.08095600 | -1.26357300 |
| C | -0.83810800 | -1.45814600 | 0.00040200  |
| C | -1.32275500 | -0.13962600 | 0.00068100  |
| C | -2.69942400 | -0.07318400 | 0.00073600  |
| C | -3.30977700 | -1.34871400 | 0.00050000  |
| S | -2.09666700 | -2.62608100 | 0.00021900  |
| H | -3.27767700 | 0.84233700  | 0.00096600  |
| C | 4.68729900  | -0.90000600 | 0.00002500  |
| C | 5.16185400  | -2.21265100 | -0.00028100 |
| C | 6.54827800  | -2.26262700 | -0.00041200 |

|   |              |             |             |
|---|--------------|-------------|-------------|
| C | 7.14145400   | -0.98758100 | -0.00020400 |
| S | 5.92950400   | 0.28513500  | 0.00015800  |
| H | 7.15105500   | -3.16294100 | -0.00063300 |
| C | -4.70206400  | -1.59340700 | 0.00045500  |
| C | -5.42703900  | -2.81239100 | 0.00050300  |
| S | -5.77990200  | -0.21259400 | 0.00044100  |
| C | -6.80777300  | -2.58319900 | 0.00039200  |
| C | -7.17703100  | -1.23984300 | 0.00025700  |
| H | -7.55450700  | -3.36564500 | 0.00031500  |
| C | -8.56536800  | -0.89527700 | -0.00005800 |
| C | -10.68545700 | 0.49988300  | -0.00062300 |
| C | -9.22822500  | 0.29626600  | -0.00032300 |
| C | -8.59146200  | 1.63851400  | -0.00014400 |
| C | -11.66618500 | -0.46186300 | -0.00125200 |
| C | -11.40079300 | -1.86300500 | -0.00169800 |
| C | -13.05781500 | -0.15213900 | -0.00152500 |
| O | -7.39561800  | 1.87456600  | -0.00007000 |
| N | -11.19836600 | -3.00740000 | -0.00205600 |
| N | -14.19793900 | 0.06957500  | -0.00175600 |
| C | -11.98396400 | 4.08420800  | 0.00014200  |
| C | -12.09687500 | 2.70452900  | -0.00018100 |
| C | -10.91711600 | 1.95624200  | -0.00027700 |
| C | -9.68062400  | 2.62102200  | -0.00003600 |
| C | -9.56604700  | 4.00340400  | 0.00027400  |
| C | -10.73897800 | 4.73274500  | 0.00035700  |
| H | -13.08798800 | 2.27279100  | -0.00033000 |
| H | -8.60129600  | 4.49558500  | 0.00044600  |
| F | -10.72062100 | 6.05615300  | 0.00064700  |

|   |              |             |             |
|---|--------------|-------------|-------------|
| F | -13.07270600 | 4.83618500  | 0.00025800  |
| C | 8.56339000   | -0.87602100 | -0.00027700 |
| C | 10.89401600  | 0.12790500  | -0.00006100 |
| C | 9.42533200   | 0.18457300  | -0.00002700 |
| C | 9.03509500   | 1.61641000  | 0.00002600  |
| C | 11.69341400  | -0.99016200 | 0.00024400  |
| C | 11.19189900  | -2.32482800 | 0.00067500  |
| C | 13.11765100  | -0.92689000 | 0.00019400  |
| O | 7.90144100   | 2.06364400  | 0.00016800  |
| N | 10.80150400  | -3.41956600 | 0.00102200  |
| N | 14.27911800  | -0.90798300 | 0.00015000  |
| C | 12.80537800  | 3.42836500  | -0.00074300 |
| C | 12.67388700  | 2.05026800  | -0.00058100 |
| C | 11.38089500  | 1.52108200  | -0.00030700 |
| C | 10.28146100  | 2.39266800  | -0.00020800 |
| C | 10.41123200  | 3.77327900  | -0.00035500 |
| C | 11.69423600  | 4.28521400  | -0.00062700 |
| H | 13.57334900  | 1.45067200  | -0.00068800 |
| H | 9.54745700   | 4.42673500  | -0.00026600 |
| F | 11.90864300  | 5.59210000  | -0.00079500 |
| F | 14.01036400  | 3.97756200  | -0.00102100 |
| H | 9.01682900   | -1.86022400 | -0.00056500 |
| H | -9.17819700  | -1.78857800 | -0.00008900 |
| H | 3.16975400   | -4.74691400 | 1.27752700  |
| H | 4.93434000   | -4.70329700 | 1.28021400  |
| H | 4.02111300   | -3.47349600 | 2.16931800  |
| H | 4.02064500   | -3.47278200 | -2.17007600 |
| H | 4.93406000   | -4.70287700 | -1.28157200 |

|   |             |             |             |
|---|-------------|-------------|-------------|
| H | 3.16947800  | -4.74649400 | -1.27852200 |
| H | -1.07661200 | 2.35272200  | -1.27839600 |
| H | 0.68858400  | 2.37403900  | -1.27888700 |
| H | -0.17809300 | 1.11179500  | -2.16930300 |
| H | -1.07641500 | 2.35216100  | 1.28083500  |
| H | -0.17776900 | 1.11083400  | 2.17105400  |
| H | 0.68878300  | 2.37346800  | 1.28107000  |
| S | -4.67125300 | -4.38258800 | 0.00064700  |
| C | -6.08217900 | -5.51276400 | 0.00085100  |
| H | -6.68674600 | -5.39130900 | -0.89834000 |
| H | -5.64661500 | -6.51210100 | 0.00025900  |
| H | -6.68590100 | -5.39203300 | 0.90070600  |

1 2 1.5 6 2.0 9 1.0

2 3 1.5 15 1.5

3 4 2.0 7 1.0

4 5 1.5 12 1.0

5 6 1.5 21 1.5

6 8 1.0

7

8

9 10 1.0 11 1.0 16 1.0

10 81 1.0 82 1.0 83 1.0

11 84 1.0 85 1.0 86 1.0

12 13 1.0 14 1.0 22 1.0

13 75 1.0 76 1.0 77 1.0

14 78 1.0 79 1.0 80 1.0

15 16 1.5 19 1.0

16 17 2.0  
17 18 1.5 20 1.0  
18 19 1.0 27 1.5  
19  
20  
21 22 1.5 25 1.0  
22 23 1.5  
23 24 1.5 26 1.0  
24 25 1.0 53 1.5  
25  
26  
27 28 1.5 29 1.0  
28 30 1.5 87 1.0  
29 31 1.0  
30 31 1.5 32 1.0  
31 33 1.5  
32  
33 35 2.0 74 1.0  
34 35 1.0 37 2.0 45 1.0  
35 36 1.0  
36 40 2.0 46 1.0  
37 38 1.5 39 1.5  
38 41 3.0  
39 42 3.0  
40  
41  
42  
43 44 2.0 48 1.5 52 1.0

44 45 1.5 49 1.0

45 46 1.5

46 47 1.5

47 48 2.0 50 1.0

48 51 1.0

49

50

51

52

53 55 2.0 73 1.0

54 55 1.0 57 2.0 65 1.0

55 56 1.0

56 60 2.0 66 1.0

57 58 1.5 59 1.5

58 61 3.0

59 62 3.0

60

61

62

63 64 2.0 68 1.5 72 1.0

64 65 1.5 69 1.0

65 66 1.5

66 67 1.5

67 68 2.0 70 1.0

68 71 1.0

69

70

71



72

73

74

75

76

77

78

79

80

81

82

83

84

85

86

87 88 1.0

88 89 1.0 90 1.0 91 1.0

89

90

91

**Input Script of neutral molecules' energies, that are calculated utilizing optimized anion geometries of IDSTR**

%nprocshared=3

%mem=2GB

# umpw1pw91/6-31g(d,p) geom=connectivity

IDSTR-e0

0 1

|   |             |             |             |
|---|-------------|-------------|-------------|
| C | 1.01964500  | -0.13261000 | -0.00069600 |
| C | 0.58815500  | -1.49125900 | 0.00042800  |
| C | 1.51602400  | -2.54705800 | 0.00152500  |
| C | 2.85742500  | -2.23048600 | 0.00147000  |
| C | 3.28842000  | -0.87433500 | 0.00032800  |
| C | 2.35873300  | 0.18262200  | -0.00076500 |
| H | 1.17797200  | -3.57872200 | 0.00239600  |
| H | 2.69780500  | 1.21400500  | -0.00163500 |
| C | -0.17507500 | 0.81994300  | -0.00175000 |
| C | -0.18874700 | 1.69529600  | -1.26353500 |
| C | -0.18917900 | 1.69761300  | 1.25840900  |
| C | 4.04988600  | -3.18602600 | 0.00253700  |
| C | 4.06026300  | -4.06152400 | 1.26414600  |
| C | 4.06068400  | -4.06387300 | -1.25742600 |
| C | -0.83802200 | -1.46873500 | 0.00019300  |
| C | -1.32296000 | -0.16668400 | -0.00104300 |
| C | -2.71063600 | -0.09268700 | -0.00147500 |
| C | -3.32841000 | -1.35304800 | -0.00057200 |
| S | -2.10705500 | -2.63092100 | 0.00096400  |
| H | -3.28422900 | 0.82603400  | -0.00260200 |
| C | 4.71388100  | -0.88755600 | 0.00054200  |
| C | 5.19808500  | -2.19946500 | 0.00180300  |
| C | 6.57648300  | -2.25502000 | 0.00202200  |
| C | 7.19404200  | -0.97921200 | 0.00090300  |
| S | 5.96014700  | 0.29515700  | -0.00042200 |
| H | 7.17567400  | -3.15836100 | 0.00292800  |
| C | -4.72521100 | -1.59735000 | -0.00051600 |
| C | -5.46197500 | -2.80382100 | -0.00121600 |

|   |              |             |             |
|---|--------------|-------------|-------------|
| S | -5.80571100  | -0.21581800 | 0.00043200  |
| C | -6.83421800  | -2.58546300 | -0.00113800 |
| C | -7.22850000  | -1.23512900 | -0.00036000 |
| H | -7.57945900  | -3.36955900 | -0.00168500 |
| C | -8.58585700  | -0.88967100 | -0.00018400 |
| C | -10.70171800 | 0.49837400  | 0.00061300  |
| C | -9.27464900  | 0.32506700  | 0.00053800  |
| C | -8.65240200  | 1.65335400  | 0.00127800  |
| C | -11.70246100 | -0.47557100 | 0.00012800  |
| C | -11.45856700 | -1.87515800 | -0.00050700 |
| C | -13.08852600 | -0.16673300 | 0.00024300  |
| O | -7.46239200  | 1.93693300  | 0.00152700  |
| N | -11.30646700 | -3.03064100 | -0.00103700 |
| N | -14.23402800 | 0.04689900  | 0.00031500  |
| C | -12.07170400 | 4.07589800  | 0.00252600  |
| C | -12.16473500 | 2.68988600  | 0.00176100  |
| C | -10.97827800 | 1.95755900  | 0.00138800  |
| C | -9.75656600  | 2.64151700  | 0.00179800  |
| C | -9.66081400  | 4.01988700  | 0.00257000  |
| C | -10.84636000 | 4.73857100  | 0.00292700  |
| H | -13.14861500 | 2.24175400  | 0.00149600  |
| H | -8.69946500  | 4.51948300  | 0.00288200  |
| F | -10.83809500 | 6.07561800  | 0.00366000  |
| F | -13.18707200 | 4.81227300  | 0.00290100  |
| C | 8.58850700   | -0.86311800 | 0.00093700  |
| C | 10.91610600  | 0.13097900  | 0.00014600  |
| C | 9.47703200   | 0.21182500  | -0.00004400 |
| C | 9.09918000   | 1.62926800  | -0.00161300 |

|   |             |             |             |
|---|-------------|-------------|-------------|
| C | 11.72903400 | -0.99995300 | 0.00146600  |
| C | 11.24419700 | -2.33623400 | 0.00296200  |
| C | 13.14878500 | -0.93838300 | 0.00145900  |
| O | 7.97892000  | 2.11900100  | -0.00219500 |
| N | 10.89309900 | -3.44695400 | 0.00421200  |
| N | 14.31348400 | -0.92898900 | 0.00149700  |
| C | 12.89162600 | 3.41257400  | -0.00344900 |
| C | 12.74059000 | 2.03251200  | -0.00188300 |
| C | 11.44360900 | 1.51952900  | -0.00137000 |
| C | 10.36059600 | 2.40605100  | -0.00242000 |
| C | 10.50750700 | 3.78041300  | -0.00396900 |
| C | 11.79998800 | 4.27962000  | -0.00448600 |
| H | 13.63076000 | 1.41915000  | -0.00113800 |
| H | 9.64850900  | 4.44064500  | -0.00475000 |
| F | 12.02669200 | 5.59616800  | -0.00598000 |
| F | 14.11739900 | 3.94346500  | -0.00399500 |
| H | 9.05052700  | -1.84390600 | 0.00193800  |
| H | -9.20848000 | -1.77669000 | -0.00071000 |
| H | 3.18501300  | -4.71686100 | 1.28584200  |
| H | 4.95468700  | -4.69030900 | 1.28580500  |
| H | 4.05090500  | -3.44662900 | 2.16641200  |
| H | 4.05158500  | -3.45066600 | -2.16084400 |
| H | 4.95513700  | -4.69266600 | -1.27763600 |
| H | 3.18547300  | -4.71929400 | -1.27818200 |
| H | -1.08694700 | 2.31853700  | -1.28632100 |
| H | 0.68255500  | 2.35581300  | -1.28387700 |
| H | -0.17499000 | 1.08032700  | -2.16567500 |
| H | -1.08741000 | 2.32086100  | 1.27976900  |

|   |             |             |             |
|---|-------------|-------------|-------------|
| H | -0.17569000 | 1.08431000  | 2.16168700  |
| H | 0.68208700  | 2.35820800  | 1.27782600  |
| S | -4.70036500 | -4.39526800 | -0.00238700 |
| C | -6.13213300 | -5.49730500 | -0.00222200 |
| H | -6.74137400 | -5.36186600 | -0.89715000 |
| H | -5.72332400 | -6.50837500 | -0.00263600 |
| H | -6.74077500 | -5.36233900 | 0.89318400  |

1 2 1.5 6 2.0 9 1.0

2 3 1.5 15 1.5

3 4 2.0 7 1.0

4 5 1.5 12 1.0

5 6 1.5 21 1.5

6 8 1.0

7

8

9 10 1.0 11 1.0 16 1.0

10 81 1.0 82 1.0 83 1.0

11 84 1.0 85 1.0 86 1.0

12 13 1.0 14 1.0 22 1.0

13 75 1.0 76 1.0 77 1.0

14 78 1.0 79 1.0 80 1.0

15 16 1.5 19 1.0

16 17 1.5

17 18 1.5 20 1.0

18 19 1.0 27 1.5

19

20

21 22 1.5 25 1.0

22 23 2.0

23 24 1.5 26 1.0

24 25 1.0 53 1.5

25

26

27 28 1.5 29 1.0

28 30 1.5 87 1.0

29 31 1.0

30 31 1.5 32 1.0

31 33 1.5

32

33 35 1.5 74 1.0

34 35 1.5 37 1.5 45 1.0

35 36 1.0

36 40 2.0 46 1.0

37 38 1.5 39 1.5

38 41 3.0

39 42 3.0

40

41

42

43 44 1.5 48 1.5 52 1.0

44 45 1.5 49 1.0

45 46 1.5

46 47 2.0

47 48 1.5 50 1.0

48 51 1.0

49

50

51

52

53 55 1.5 73 1.0

54 55 1.5 57 1.5 65 1.0

55 56 1.0

56 60 2.0 66 1.0

57 58 1.5 59 1.5

58 61 3.0

59 62 3.0

60

61

62

63 64 1.5 68 1.5 72 1.0

64 65 1.5 69 1.0

65 66 1.5

66 67 2.0

67 68 2.0 70 1.0

68 71 1.0

69

70

71

72

73

74

75

76

77

78

79

80

81

82

83

84

85

86

87 88 1.0

88 89 1.0 90 1.0 91 1.0

89

90

91
